# Supplementary material
Source: publisher figshare collection journal article supplement (https://geolsoc.figshare.com/ndownloader/files/13051181)
Supplement: Supplementary file 1 [file 13051181]

## Sheet: KLA geochron and Wr composition
				Age	U-Pb Zircon age	WR Composition	Isotopic	SiO2	TiO2	Al2O3	Fe2O3	FeO	FeoTot	MnO	MgO	CaO	Na2O	K2O	P2O5	H2O	Total	XMg-FeOTot	Sc	V	Cr	Co	Ni	Cu	Zn	Ga	P	Ti	Cs	Rb	Ba	Th	U	Nb	Ta	La	Ce	Pb	Pr	Sr	Nd	Sm	Zr	Hf	Eu
	Sample#	Rock type	Supergroup	Reference		Reference	Reference
1	Ko8-3	Granitoid	Kohistan Batholith	PB-2013	76.9	This Study	PB-2013	70.9844	0.367547	15.5555	0.304995	2.46993	2.74412	0.0617559	1.15842	3.84182	4.23028	1.10762	0.103591	0.397073	100.552	0.42926	7.3	55.1	6		14.7	4.3	30.2				0.147691	21.1	376.101	0.414765	0.134593	3.14022	0.190837	13.788	24.1596	6.12551	2.60062	303.226	9.54216	1.80763	126.792	3.17929	0.775754
2	PGUP-9	Granitoid	Kohistan Batholith	PB-2013	58.9	This Study	PB-2013	71.0299	0.349745	14.429	0.244424	1.97941	2.19915	0.0665707	0.669681	2.32103	4.17905	3.19341	0.100353	0.637	99.1749	0.351719		28.3	0.5		3.2	1.57333	27.7				2.9556	79.9934	365.759	11.1193	2.9698	5.86809	0.599627	20.9763	39.1683	8.02696	4.4424	201.812	15.9942	3.32456	174.755	4.56532	0.79612
3	PGUP-16	Granitoid	Kohistan Batholith	PB-2013	83.5	This Study	PB-2013	66.2527	0.433121	15.5586	0.350073	2.83499	3.14971	0.0645708	2.11693	4.15439	4.27161	2.19541	0.147023	0.656	99	0.544926		69	57.3		31.1	3.68267	37.5				1.47089	53.0392	304.805	6.35825	1.39059	3.63462	0.363243	15.6494	29.293	3.93783	3.2388	484.95	11.5964	2.12826	103.24	2.57806	0.701225
4	PK05-39	Granitoid	Kohistan Batholith	PB-2013	86	This Study	PB-2013	66.7099	0.375408	15.4057	0.362355	2.93445	3.26021	0.0715374	2.77837	4.76215	3.94035	1.54001	0.124938	0.69	99.6585	0.60291	11.1	92.2	90.7		34.8	29.3	44.1	15.2			1.44339	38.9904	353.342	2.46364	0.872711	2.71097	0.208177	7.55052	15.1899	6.42172	1.90114	513.839	7.92343	1.76186	74.1672	2.1078	0.582048
5	PGLT-19	Granitoid	Kohistan Batholith	PB-2013	64.8	This Study	PB-2013	62.3068	0.812857	16.6	0.539387	4.36811	4.85302	0.108315	1.98941	4.73802	4.4727	2.21399	0.269296	0.626	98.9904	0.422083		94.5	8.8		14	10.2913	56.7				1.81298	81.8266	362.459	5.18137	1.58363	19.4622	1.30678	23.2656	42.9842	9.85665	4.91202	442.586	18.5758	3.92658	218.304	4.71801	1.24209
6	PGAK-26	Granitoid	Kohistan Batholith	PB-2013	72.1	This Study	PB-2013	63.7975	0.609107	16.6681	0.476274	3.857	4.28517	0.124996	1.77177	4.47505	4.39172	1.69935	0.221223	0.791	98.835	0.424177		85.6	13.4		10.5	16.6647	74.7				4.28536	62.1997	289.302	4.97418	1.85158	5.53499	0.497269	14.0855	30.3246	9.76947	4.06007	441.776	17.4601	4.05624	185.952	4.81212	1.24396
7	PGUP-15	Granitoid	Kohistan Batholith	PB-2013	58.8	This Study	PB-2013	74.0954	0.159125	13.7424	0.109498	0.886743	0.985181	0.0735952	0.18001	0.843361	4.22277	4.29338	0.0358031	0.543	99.1741	0.245588		10	2.3		5.5	1.296	12.8				4.4926	133.523	413.019	14.758	1.39122	9.33256	1.24171	19.2617	36.2137	14.9344	3.90071	72.838	13.0492	2.86106	84.5137	3.00461	0.440196
8	PBa-04	Granitoid	Kohistan Batholith	PB-2013	61.3	This Study	PB-2013	68.1446	0.546502	15.3638	0.42665	3.45513	3.83869	0.0617179	1.10395	5.60638	3.54978	0.380262	0.1095	0.453	99.1581	0.338788		86.1	3.8		4	10.8	28.4				1.32808	12.9736	111.081	1.74915	0.613044	1.30629	0.108608	8.55092	14.1051	3.85524	1.63686	456.204	6.65205	1.47383	313.617	6.91854	0.730684
9	PBa-15	Granitoid	Kohistan Batholith	PB-2013	72	This Study	PB-2013	58.2129	1.22001	16.499	0.804885	6.51818	7.24177	0.132783	2.85633	5.91334	4.02542	2.16546	0.296515	0.162	98.7255	0.412705		182.7	6.2		14	16.993	78.4				5.65764	76.8411	237.1	8.93696	1.52148	8.87686	0.696234	24.9053	54.0544	10.3519	6.85343	356.474	27.8731	6.38445	239.393	5.84984	1.68229
10	KO8-13	Granitoid	Kohistan Batholith	PB-2013	50.4	This Study	PB-2013	65.7331	0.478711	17.5052	0.393772	3.18887	3.54288	0.0693784	1.31323	5.58298	3.27367	1.83258	0.137766	0.894737	100.364	0.397735	4.2	41.1	4.2		8.4	4.4	67.7				10.7562	85.8789	243.848	15.0143	1.50247	5.8272	0.44366	39.1557	75.2935	16.9964	8.13145	390.763	28.8213	4.70309	128.036	3.43761	1.09532
11	O1A-07	Granitoid	Kohistan Batholith	PB-2013	37.2	This study	PB-2013	70.22	0.33	15.59	0.276	2.23512	2.48325	0.05	0.76	2.58	3.41	3.84	0.13	0	99.3932	0.352865	4.08955	40	169		7	10	51				3.53376	96.6214	986.288	14.0512	1.17926	10.7598	0.754912	37.5219	67.1513	24.7861	7.28044	680.769	24.9842	4.09028	147.285	3.8955	1.07094
12	O1B-22	Granitoid	Kohistan Batholith	PB-2013	39.9	SH-2007	PB-2013	69.83	0.38	14.88	0.267	2.16224	2.40227	0.04	0.77	2.92	3.24	2.98	0.12	0	97.5623	0.36349		38	77		3	24	52				0.55	65.79	1066.56	10.58	0.183	6.48	0.153	42.59	76.09	13.52	7.18	396.16	23.09	2.94	212		0.77
13	O1B24	Granitoid	Kohistan Batholith	PB-2013	40.9	SH-2007	PB-2013	46.43	1.1	20.99	1.218	9.8637	10.9587	0.16	3.87	11.69	2.11	0.39	0.09	0	97.7887	0.386193		418	54		5	119	77				0.25	4.99	56.25	1.43	0.284	2.18	0.131	4.92	11.51	3.37	1.54	392.75	6.95	1.76	30		0.68
14	PGAK-13.1	Granitoid	Kohistan Batholith	PB-2013	47.9	This Study	PB-2013	60.5249	0.732834	16.7219	0.67029	5.42819	6.03078	0.141197	2.59624	6.05458	3.96546	1.4428	0.229694	0.563	99.0035	0.434067		143.7	4.6		9.1	7.935	63.3				1.71075	49.0364	234.25	4.17785	0.932554	4.75987	0.315966	21.0738	44.2277	6.87297	5.39476	496.493	21.2245	4.64059	142.596	3.56661	1.34379
15	PGAK-18.5	Granitoid	Kohistan Batholith	PB-2013	51.5	This Study	PB-2013	59.07	0.539	19.879	0.433369	3.50954	3.89914	0.105	2.299	6.626	4.813	1.714	0.302	0	99.2461	0.51231	9.6	64.9	1.9		4.3	56.7	56.1	16.3			3.09578	66.312	490.288	8.08201	1.60546	1.89128	0.135319	32.257	50.91	9.30386	5.28525	847.32	19.2565	3.48287	171.561	4.05298	1.29495
16	PK06-36	Granitoid	Kohistan Batholith	PB-2013	46.3	This Study	PB-2013	68.8306	0.413216	14.917	0.342793	2.77604	3.08421	0.0695871	0.958419	2.68876	3.26873	4.12299	0.108712	0.6	99.0622	0.356352	8	47	8.1		4.5	2.2	43.6	15.5			19.9127	174.375	628.129	22.9986	2.77492	7.84806	0.761741	30.1276	58.413	18.9397	6.43258	250.972	23.037	4.64283	193.447	5.44081	0.861415
17	KO8-4	Granitoid	Kohistan Batholith	PB-2013	31.66	This Study	PB-2013	64.9991	0.61382	17.0325	0.507099	4.10663	4.56251	0.0976531	1.80459	5.64196	3.15778	1.78765	0.138508	0.356436	100.193	0.413381	12.7	50.8	14.9		14.3	24.4	79.6				8.10481	139.392	1131.84	39.9824	6.84388	10.1092	0.595096	36.0824	64.0589	71.6476	6.57428	796.687	21.3478	3.08031	120.942	3.4546	0.673224
18	PJa-04	Granitoid	Kohistan Batholith	PB-2013	30.1	This Study	PB-2013	70.7676	0.282632	15.3537	0.189782	1.5369	1.70752	0.02687	0.509534	2.45114	4.05239	3.38164	0.0905618	0.478	99.1015	0.34711		28	0		2.4	21.3963	54.8				0.825444	67.612	1619.11	21.8251	3.39302	2.81552	0.198192	36.0228	60.0216	24.6316	6.06562	614.455	19.5436	2.88853	159.139	3.8537	0.758881
19	PK05-20	Granitoid	Kohistan Batholith	PB-2013	42.1	This Study	PB-2013
20	PK05-16	Granitoid	Kohistan Batholith	PB-2013	41.5	This Study	PB-2013
21	SU-01-8	Granitoid	Kohistan Batholith	This study	30.36	This study	This study	71.8	0.14	15.96	1.03		0.92597	0.02	0.2	1.95	3.75	4.23	0.02	0.06	99.056	0.277882		12	95	3	2	24	27	16			1.28362	75.7508	1144	7.48009	0.331052	3.68911	0.200544	10.3447	20.0909	25.7755	2.15309	353.98	7.64122	1.24186	103	7	0.447104
22	SU-01-9	Granitoid	Kohistan Batholith	This study	50	This study	This study	68.8	0.37	17.76	2.05		1.84295	0.03	0.73	3.38	4.54	2.39	0.12	0.25	100.213	0.413735		46	11	5	2	7	43	19			1.93412	64.8098	765	15.122	0.957912	5.94734	0.472768	33.7297	57.3289	19.8205	5.52039	613.46	18.0941	2.40586	131	8	0.589328
23	SU-01-10	Granitoid	Kohistan Batholith	This study	50.44	This study	This study	56.07	0.77	17.35	7.26		6.52674	0.15	3.41	6.76	3.41	2.96	0.27	0.62	98.2967	0.482092		166	30	15	14	79	75	16			5.21042	86.2058	888	2.73459	0.729722	7.95637	0.375152	28.6197	54.8019	12.8195	6.19369	652.67	24.7321	4.90836	108	6	1.38382
24	SU-01-11	Granitoid	Kohistan Batholith	This study	70	This study	This study	63.5	0.61	18.05	4.14		3.72186	0.07	1.76	4.48	4.49	2.14	0.24	0.46	99.5219	0.45726		90	22	7	12	26	67	17			3.76572	76.8118	577	8.80189	1.97595	7.46967	0.496691	29.0447	54.8249	13.1335	5.87839	924.78	21.4551	3.34056	139	7	0.903226
25	SU-01-13	Granitoid	Kohistan Batholith	This study	151	This study	This study	60.99	0.5	18.5	5.76		5.17824	0.18	1.73	6.37	3.57	0.85	0.19	0.43	98.4882	0.37313		66	6	10		12	79	16			0.932414	36.3888	118	1.89829	0.394452	3.18168	0.188497	10.5537	24.9699	2.68844	3.19099	507.12	13.8001	2.90336	78	4	0.953525
26	01B-25 (age 112)	Granitoid	Kohistan Batholith	SH-2007	112	SH-2007	SH-2007	61.41	0.45	16.3			5.30105	0.11	2.39	5.53	2.94	2.1	0.15	1.93	98.6111	0.445448		127	87	16	6	66	38	14			1.36	43.75	604.72	8.71	1.531	3.86	0.213	19.4	38.41	2.91	4.32	414.79	16.87	3.2	86		0.92
30	LB06-11	Granitoid	Ladakh Batholith	PB-2013	102.1	This study	PB-2013	73.9499	0.302465	13.7191	0.262981	2.12969	2.36611	0.0651717	0.47617	2.78472	4.49803	1.14158	0.066231	0.33	99.6994	0.26392	5.8	20.2	4.1		1.9	0.4	28.3	14.4			0.819746	31.6719	219.923	6.50127	0.961233	3.01291	0.271282	25.2227	42.7248	3.59402	4.42467	174.169	15.4544	2.57802	169.058	4.52502	1.25152
31	LB09-213A	Granitoid	Ladakh Batholith	PB-2013	98.6	This study	PB-2013	67.6483	0.375661	16.8657	0.299854	2.4283	2.69787	0.0686842	1.23936	4.57772	4.65421	1.05948	0.117538	0.492958	99.7975	0.450084	5.4	46.5	22.5		9.3	1.6	54.9	18.2			0.843629	30.1602	288.272	2.44326	0.48587	3.62435	0.219819	10.043	18.6438	5.72089	2.13546	528.114	8.18946	1.73196	132.818	3.49654	0.689872
32	LB09-22.7A	Granitoid	Ladakh Batholith	PB-2013	72	This study	PB-2013	76.333	0.0873492	12.4386	0.0865614	0.700998	0.778817	0.035597	0.0934049	0.692469	4.15705	3.71575	0.0196013	0.254731	98.6063	0.176056	3.9	4.5	13.9		6.3	0	14	12.3			2.63921	112.596	561.477	11.125	2.01007	4.39978	0.476321	19.8931	40.2558	19.6618	4.72706	44.6631	17.1964	4.0952	92.462	3.53885	0.309659
33	LB09-23.11A	Granitoid	Ladakh Batholith	PB-2013	62.7	This study	PB-2013	70.516	0.424386	14.7972	0.343171	2.77909	3.0876	0.0915224	1.06805	3.35414	4.23226	1.56824	0.123753	0.597116	99.8602	0.381302	10.1	53.4	12.2		5.7	0.3	54.3	15.3			2.48238	52.8188	266.761	6.57318	1.53241	4.16458	0.317076	14.6719	28.5786	8.45046	3.27297	245.716	11.9699	2.53528	150.594	4.08163	0.800841
34	LB09-5.2B	Granitoid	Ladakh Batholith	PB-2013	61.8	This study	PB-2013	76.5035	0.111522	12.2701	0.0843453	0.683051	0.758878	0.0488339	0.110974	0.810385	3.33551	4.65643	0.0193224	0.282545	98.908	0.206688	3.4	5.3	10.4		5.7	0.4	21.2	10.1			0.590667	92.4239	325.715	15.5448	0.809242	3.68212	0.20678	25.8772	46.4893	18.062	4.74943	58.8896	15.2537	2.6474	69.1897	2.10032	0.308188
35	LB08-12	Granitoid	Ladakh Batholith	PB-2013	58.5	This study	PB-2013	59.4789	0.94902	16.5555	0.689855	5.58664	6.20682	0.127808	3.26236	6.63013	3.71734	1.43804	0.19704	0.36	98.923	0.48359	21.8	184.4	29.3		11.2925	66.2	83.7	18.5			5.06703	42.72	238.238	3.12903	0.701749	2.78105	0.184297	10.9917	26.2036	9.09698	3.72578	391.427	16.6815	4.20526	126.37	3.79188	1.0731
36	LB08-7	Granitoid	Ladakh Batholith	PB-2013	58.1	This study	PB-2013	77.1471	0.112427	12.1337	0.0570753	0.462211	0.513522	0.0262883	0.0610247	0.525939	2.88366	5.63884	0.00903016	0.2	99.2515	0.174728	3	4.8	2.9		0.216721	0	6.2	10.4			0.493049	103.298	329.127	12.6736	0.708902	3.08161	0.20167	23.5249	41.6923	11.1658	4.18269	43.2572	13.375	1.93402	82.945	2.53198	0.444541
37	LB09-48	Granitoid	Ladakh Batholith	PB-2013	53.4	This study	PB-2013	60.2325	0.809001	17.0142	0.643774	5.21346	5.79221	0.139649	2.82194	5.99847	4.10366	1.31999	0.211172	1.02967	99.4725	0.46467	18.8	154.6	16.8		10.7	19.9	73.4	19.1			1.15354	35.2209	354.441	1.19353	0.330302	4.77707	0.265529	17.5851	38.1886	5.32756	4.8049	451.023	19.5729	4.32777	160.455	4.13638	1.19556
38	LB09-30	Granitoid	Ladakh Batholith	PB-2013	53.3	This study	PB-2013	61.9156	0.885793	16.4019	0.619011	5.01292	5.56941	0.107747	2.43718	5.13914	3.59349	2.93557	0.242257	0.256674	99.4848	0.438091	14.1	137	24.4		13.7	26.6	67.3	19.3			11.2586	117.58	470.664	13.1007	2.90076	6.58458	0.433241	25.5901	53.8694	9.08999	6.46982	408.412	24.5663	5.03469	328.037	8.34786	1.28777
39	LB09-24.5	Granitoid	Ladakh Batholith	PB-2013	51.5	This study	PB-2013	72.9216	0.253123	14.2919	0.1693	1.37104	1.52324	0.0537342	0.51538	1.93403	3.86814	3.83909	0.0731562	0.593681	99.8671	0.376095	3.8	21.3	6.1		3.9	1.5	15.6	12.9			2.5977	124.371	585.049	19.9361	2.95899	5.29746	0.481024	25.3011	46.619	12.2995	4.90058	244.902	16.3171	2.90625	138.466	3.73664	0.700105
40	LB09-16.7A	Granitoid	Ladakh Batholith	PB-2013	51.6	This study	PB-2013	68.5473	0.455979	15.291	0.345165	2.79524	3.10554	0.102847	1.19913	3.34478	4.38456	2.34809	0.139749	0.281889	99.2008	0.407561	8.4	61.5	12.8		5.9	3.1	47.8	16.3			1.70439	64.7214	515.899	6.937	1.46281	4.71672	0.357508	19.6652	37.2843	6.51519	4.24495	316.019	15.6981	3.25303	150.539	3.96302	0.932415
41	LB08-25	Granitoid	Ladakh Batholith	PB-2013	50.3	This study	PB-2013	72.1379	0.295545	14.3134	0.163297	1.32243	1.46923	0.0444448	0.520429	1.71991	3.83031	4.15534	0.0831383	0.46	99.0297	0.386913	3.3	23.7	4.2		0.266073	0	27.8	14			2.80903	109.966	566.288	13.122	1.28779	6.13897	0.563435	23.2352	47.0835	12.971	5.44819	268.457	18.9894	3.32746	180.211	4.97765	0.724904
42	LB08-31	Granitoid	Ladakh Batholith	PB-2013	59.5	This study	PB-2013	74.2058	0.215026	13.7141	0.127101	1.0293	1.14356	0.055986	0.339606	1.64495	4.17692	3.41107	0.0531257	0.17	99.1301	0.346019	3.3	13.8	4.7		0	0	15.8	14.2			1.01579	94.2857	467.286	10.741	1.9404	6.84338	0.605356	18.3048	34.6481	8.27322	3.74286	163.545	13.0767	2.58684	111.106	3.20206	0.761085
43	LB09-16.6A	Granitoid	Ladakh Batholith	PB-2013	60.9	This study	PB-2013	68.2509	0.56781	15.6818	0.376288	3.04728	3.38557	0.110407	1.18484	3.66718	4.77689	1.60573	0.178354	0.288511	99.6979	0.384053	12.9	55.4	12.5		6	4	52.7	17.8			1.35122	67.6872	245.064	4.94643	2.0643	13.7133	1.0053	14.1325	31.6848	7.95877	4.32025	305.609	18.1081	4.8279	197.799	5.18006	1.25383
44	LB09-33	Granitoid	Ladakh Batholith	PB-2013	66	This study	PB-2013	72.9275	0.25401	14.1922	0.197173	1.59676	1.77402	0.0560051	0.533418	2.05833	3.98252	3.3646	0.0783752	0.380815	99.6018	0.348835	3.8	18.6	7.8		4.2	1.4	32.5	14.1			3.17802	110.189	538.381	15.2483	3.20581	7.90712	0.91815	28.8298	49.7852	13.0404	5.08752	206.935	16.7968	3.02969	144.689	3.96943	0.69661
45	LB08-23	Granitoid	Ladakh Batholith	PB-2013	48.1	This study	PB-2013	62.2039	0.659023	15.6718	0.45198	3.66026	4.06659	0.0873223	2.28356	4.62656	4.38443	3.6039	0.446161	0.63	98.6632	0.500116	8.8	100	38.5		19.0424	7.3	63.8	18.5			3.94932	124.044	2544.37	70.0171	8.01164	16.4309	0.97116	83.0542	144.165	71.8134	15.0412	1113.64	51.9717	8.83298	251.877	6.48204	2.0934
46	LB09-11.4A	Granitoid	Ladakh Batholith	PB-2013	39.81	This study	PB-2013	70.4022	0.392205	15.1446	0.231288	1.87304	2.08096	0.0554374	0.847965	2.31446	4.20312	3.36478	0.188264	0.533163	99.5271	0.420624	5.7	41.8	14		9.3	26.6	73.8	22.8			30.8501	252.806	712.698	29.2778	6.01033	11.9627	1.3339	39.5787	71.9289	56.2873	7.50973	472.703	25.135	3.89272	138.193	3.97973	0.816385
47	LB09-11.5	Granitoid	Ladakh Batholith	PB-2013	29.64	This study	PB-2013	71.3462	0.302575	14.536	0.172509	1.39703	1.55211	0.0314836	0.463409	1.52976	3.42858	4.78655	0.141382	0.646073	98.7641	0.347232	3.5	25.8	8.5		4.8	1.1	53.4	22.9			13.9905	305.51	627.701	42.6333	8.82778	11.6877	1.53432	51.7254	97.0618	69.4907	10.4355	262.835	34.1367	5.80333	156.019	4.67016	0.814043
48	LB11-010	Granitoid	Ladakh Batholith	PB-2013	21.5		PB-2013
49	LB11-016	Granitoid	Ladakh Batholith	PB-2013	25.1		PB-2013
50	LB11-S36	Granitoid	Ladakh Batholith	PB-2013	68.5		PB-2013
51	C75	Granitoid	Chilas Granitoids	This study	79.6	This study	This study	70.45	0.234	16.02	2.29		2.05871	0.053	1.07	4	4.56	0.78	0.05	0.37	99.6457	0.480787		20.9742	24.0679	4.57972				14.99			0.223107	11.067	315.578	0.405523	0.078557	1.1976	0.059364	8.61933	14.3297		1.45657	430.808	4.69506	0.702565	82.9604	2.2991	0.544995
52	C220 **	Granitoid	Chilas Granitoids	This study	74.62	This study	This study	55.37	0.82	17.78	8.86		7.96514	0.15	4.49	8.52	2.91	0.77	0.14		98.7551	0.501078		186	29	26	22	49	64	18				7	153	0.23	0.07	3	0.26	11.5	22.6		2.89	333	12.1	3.1	88	2.7	1.06
53	C 03 45II	Ultramafic	Chilas UM	US-2002	85	OJ_2006	OJ_2006	41.94	0.057	0.89	12.46		11.2015	0.177	38.72	5.58	0.06				99.864	86.0235		35.3081	1310		551.994		49.7706	1.02273	0.857605	341.657					0.010524			0.093646	0.346363		0.064946	6.3178	0.451612	0.171801	1.08401		0.062575
54	C03_45	Ultramafic	Chilas UM	US-2002	85	OJ_2006	OJ_2006	41.94	0.057	0.89	12.46		11.2015	0.177	38.72	5.58	0.06				99.864	86.0235		35.3081	1310		551.994		49.7706	1.02273	0.857605	341.657					0.010524			0.093646	0.346363		0.064946	6.3178	0.451612	0.171801	1.08401		0.062575
55	CO3_43 Wr	Ultramafic	Chilas UM	US-2002	85	OJ_2006	OJ_2006
56	C03_44 WR	Ultramafic	Chilas UM	US-2002	85	OJ_2006	OJ_2006
57	C03_45 Wr	Ultramafic	Chilas UM	US-2002	85	OJ_2006	OJ_2006
58	C 174	Ultramafic	Chilas UM	US-2002	85	OJ_2006	OJ_2006	37.55	0.045	1.05	13.75		12.3613	0.188	46.41	0.95	0.02	0	0		99.963	86.9879		54.0531	7240	158.815	1100		89.6261	2.82546	0.925987	269.73				0	0	0	0		0.060635		0.012533		0.0816327	0.0401251	2.33218	0	0.01571
59	C 123	Ultramafic	Chilas UM	US-2002	85	OJ_2006	OJ_2006	37.91	0.017	0.42	13.21		11.8758	0.175	46.63	0.31	0	0.03	0.01		98.712	87.4866		16.0123	2930	166.685	1470	20.3511	47.0993	1.0834	0.846744	101.898				0		2.22156	0	0.441148	0.33038		0.083068		0.198998	0.042989	3.24909	0.147754	0.006592
60	C 218	Ultramafic	Chilas UM	US-2002	85	OJ_2006	OJ_2006	43.41	0.171	4.39	13.68		12.2983	0.198	28.95	9.49	0.23	0	0.01		100.529	80.7376	43	106.124	1460	111.718	545.236		69.2602	4.12034	1.1553	1024.97				0	0.588903	0	0	0.168373	0.639748		0.134788	58.2786	0.94053	0.422148	4.7503	0.220047	0.173897
61	C219	Ultramafic	Chilas UM	US-2002	85	OJ_2006	OJ_2006	40.06	0.117	1.09	16.53		14.8605	0.216	37.46	3.25	0.09	0.02	0.01		98.843	81.78	19	61.9363	1850	184.179	911.641	34.7764	102.482	2.40693	1.00328	701.297				0	0.0163453	0.990152	0	0.417902	0.809134	5.8907	0.183649	6.99567	0.954956	0.383815	5.58871	0.279296	0.130438
62	C134	Gabbronorite	Chilas GNR	US-2002	85	OJ_2006	OJ_2006	54.2	0.851	18.89	8.39		7.54261	0.143	4.66	8.89	3.69	0.35	0.21		100.274	52.3829	26	195.878	45.5666	25.1439	28.5281	56.7613	74.3055	18.763	1.34129	5100.89	0.341972		106.934	0.113054	0.040441	2.89348	0.136796	6.89938	13.9856		1.87437	384.838	8.51577	2.46502	39.5895	1.35702	1.05714
63	C 48	Gabbronorite	Chilas GNR	US-2002	85	OJ_2006	OJ_2006	52.38	0.268	18.75	7.76		6.97624	0.131	7.53	9.81	2.76	0.13	0.03		99.549	65.776	28	136.719	180.458	35.2662	83.6791	38.2713	47.1404	16.3447	1.19768	1606.39		1.13023	48.6931	0	0.010816	0.918676	0	1.22557	2.44749		0.34983	376.975	1.68017	0.561452	7.3371	0.296952	0.453419
64	C138	Gabbronorite	Chilas GNR	US-2002	85	OJ_2006	OJ_2006	55.37	0.912	18.08	8.28		7.44372	0.138	4.5	8.73	3.65	0.44	0.17		100.27	51.8404	24	170.997	52.265	25.2933	31.8127	28.5326	80.0262	18.9109	1.09399	5466.52			151.598	0.138594	0.074123	2.90951	0.186927	8.99799	18.7849		2.55988	394.17	11.0932	2.98471	45.9881	1.39167	1.0745
65	C132	Gabbronorite	Chilas GNR	US-2002	85	OJ_2006	OJ_2006	52.44	0.394	18.63	7.43		6.67957	0.135	7.12	10.57	2.77	0.28	0.05		99.819	65.4933	27	97.0619	140.869	28.2472	57.9418	27.8704	52.3048	16.2819	1.24412	2361.63	0.216149	4.29095	75.1248	0.441623	0.09949	0.62394	0.031621	3.45073	7.10254		0.976615	364.542	4.18879	1.24215	21.0077	0.71563	0.665751
66	C7	Gabbronorite	Chilas GNR	US-2002	85	OJ_2006	OJ_2006	52.15	0.297	18.86	7.86		7.06614	0.133	7.77	9.68	2.69	0.16	0.02		99.62	66.1928	26	115.134	216.879	36.2283	88.6365		58.7362	16.8536	1.19453	1780.22			46.3321	0	0.024937	0.370125	0	1.49674	2.96907		0.414924	366.629	2.08668	0.708159	7.21789	0.317091	0.472488
67	C135	Gabbronorite	Chilas GNR	US-2002	85	OJ_2006	OJ_2006	52.09	0.836	19.66	8.68		7.80332	0.141	5.16	9.73	3.47	0.22	0.15		100.137	54.0742	25	190.841	50.3834	26.202	29.7519	38.1181	37.8332	18.9994	0.74797	5010.98		1.24277	95.0555	0.100396	0.032457	1.43433	0.089418	5.64137	11.5834		1.63622	424.58	7.17259	1.95596	27.5328	0.928549	0.823885
68	C136	Gabbronorite	Chilas GNR	US-2002	85	OJ_2006	OJ_2006	52.45	0.85	19.61	8.85		7.95615	0.153	4.87	9.46	3.7	0.1	0.19		100.233	52.1509	24	185.174	41.8309	26.8145	26.3656	86.1594	79.0286	19.1591	1.15563	5094.89			72.6109	0.074563	0.037086	1.2496	0.068353	4.31603	9.17998		1.2741	452.464	5.97723	1.65949	21.6307	0.701636	0.880375
69	J 21	Ultramafic	SPC UM	BD-2006	116	This Study	This Study	51.63	0.055	1.13	4.41		3.96459	0.135	23	17.74	0.17				98.25	91.1737		77.0795	2620	24.9537	109.251				0.517516	329.67									0.085047		0.021621	12.5727	0.21509	0.128476			0.061068
70	J 34	Ultramafic	SPC UM	BD-2006	116	This Study	This Study	42.27	0.007	0.32	9.22		8.28878	0.138	42.73	3.11	0.08	0.04			97.905	90.176		22.7286	1960	88.0668	1400	106.556	35.8873		0.854693	41.9579			3.58663								0.011747		0.0740099	0.027291			0.006076
71	J 23	Ultramafic	SPC UM	BD-2006	116	This Study	This Study	49.02	0.149	2.27	9.43		8.47757	0.182	22.85	15.79	0.16	0.1			99.941	82.7565		181.622	1110	55.8425	190.708			2.36008	1.37298	893.105									0.230088		0.063055	8.20261	0.576639	0.30044			0.136386
72	j 3 rep	Ultramafic	SPC UM	BD-2006	116	This Study	This Study
73	J 3	Ultramafic	SPC UM	BD-2006	116	This Study	This Study	41.66	0.445	15.73	15.46		13.8985	0.375	10.97	12.84	0.56		0.03		98.06	58.4269		365.584	86.8678	33.2573	29.7296		40.5282	8.52684	1.50589	2667.33								0.161916	0.708123		0.170928	15.3256	1.65801	0.949884	5.6273	0.242708	0.587467
74	J 45	Grt-Gabbro	SPC Mafic	DB-2011	97.7	This Study	This Study
75	J 43	Grt-Gabbro	SPC Mafic	DB-2011	97.7	This Study	This Study
76	J 46	Grt-Gabbro	SPC Mafic	DB-2011	97.7	This Study	This Study
77	j 40 rep	Grt-Gabbro	SPC Mafic	DB-2011	97.7	This Study	This Study
78	J 40	Grt-Gabbro	SPC Mafic	DB-2011	97.7	This Study	This Study	50.15	0.719	19.24	11.23			0.189	5.47	10.62	2.41	0.1	0.08		100.208	49.1027		294.125	22.4597	25.1013	20.5017	51.1264	74.5472	15.3389	1.24944	4309.68			75.5275	0.05227	0.012258			2.40936	5.5106		0.784612	277.02	4.17239	1.34984	8.894	0.395425	0.724521
79	j 29	ultramafic	SPC UM	BD-2006	116	This Study	This Study	51.45	0.022	0.64	4.6			0.109	21.92	18.68	0.13				97.531	90.4197		95.5996	1840	40.1368	299.938	198.856			1.46399	131.868					0.010615
80	J10	ultramafic	SPC UM	BD-2006	116	This Study	This Study	40.93	0.011	0.57	10.05			0.153	41.68	4.42	0.03				97.824	89.1472		24.7289	3810	95.4194	547.936		39.8998		0.915865	65.9339
81	J12	ultramafic	SPC UM	BD-2006	116	This Study	This Study	50.66	0.308	3.86	8.96			0.193	16.92	18	0.27				99.151	78.9039		322.871	933.986	39.9782	84.3633	25.782	32.0791	4.39254	1.75158	1846.15								0.165769	0.721197		0.17307	12.3434	1.53495	0.690892	2.43914	0.159062	0.306394
82	P63	granitoids	Sapat Crust	PB-2011	98.91	PB-2011	PB-2011	79.5146	0.0368004	12.1342	0.17505			0.00497302	0.0487356	3.63428	3.47216	0.0228759	0.00895144	0.537368	99.5901		3.1	3.98996	9.44043	2.03899	0.575079	5.01244	4.01481	10.6		373.846	0.222304	0.218994	10.8546	0.0189741	0.00356634	0.0400507	0.00494669	0.208707	0.365261	1.43868	0.0367738	146.595	0.17711	0.0628039	0.433284	0.0508792	0.22954
83	D101	granitoids	Sapat mantle	PB-2011	103.81	PB-2011	PB-2011	64.0126	0.0138916	20.771	0.302639			0.0138916	0.132963	5.61222	7.14625	0.0178607	0.0119071	0.764768	98.8011		3.7	0.0272514	5.16634	3.6369	3.86995	17.0951	2.82204	17.9		66.2046	0.0372051	0.143118	17.9466	0.016556	0.00278583	0.0184707	0.00351087	0.620518	1.39767	0.602228	0.16877	126.378	0.789608	0.166976	3.00612	0.127697	0.646099
84	G13	granitoids	Sapat Crust	PB-2011	98.84	PB-2011	PB-2011	75.8027	0.0963337	13.0726	0.92957			0.0417115	0.368451	2.93967	4.71836	0.0238351	0.0178764	0.677944	98.6913		5	8.26873	3.30347	3.77095	2.75933	117.527	10.3485	13.4		531.568	0.0654938	0.101208	15.8849	0.0189381	0.0039628	0.290392	0.0214774	0.89242	2.08302	1.17271	0.275916	58.4871	1.32849	0.299704	46.8671	1.34459	0.508892
85	P8	granitoids	Sapat Crust	PB-2011	104.77	PB-2011	PB-2011	62.6402	0.0963267	20.1134	1.32077			0.0605766	1.44589	4.12815	9.06265	0.0546182	0.0188681	0.69158	99.634		3.9	3.06197	5.9463	4.08578	7.67994	3.40758	40.3615	12.4		604.592	2.38647	2.06924	72.2255	0.01	0.0038945	0.307518	0.0177062	0.55127	1.63588	1.2692	0.29326	198.62	1.90667	0.815365	3.42012	0.208746	0.765284
86	G12	granitoids	Sapat Crust	PB-2011	104.38	PB-2011	PB-2011	63.6325	0.0998567	19.2951	1.15082			0.021751	0.692076	3.65812	9.66237	0.0365812	0.0148302	1.12508	99.3915		0.1	12.5449	3.9407	4.30563	19.1135	22.3771	23.2898	2.1		619.104	0.090351	0.209756	9.64799	0.003665	0.0024225	0.0620844	0.00338026	0.328764	0.729901	0.0871285	0.09731	40.617	0.493692	0.120448	2.07052	0.0211159	0.549561
87	K08-18†	granitoids	Sapat Crust	PB-2011	93.58	PB-2011	PB-2011	62.2104	0.632938	16.2748	6.00751			0.116775	2.20302	6.40494	3.26282	0.787002	0.168783	1.869	99.9411		13.3	110.7	9.1	16.3	13.8	13.5	76.2	18.6		3431.96	0.738495	17.4081	251.583	1.46854	0.262241	2.25544	0.0846422	10.7305	26.4263	2.66063	3.47026	417.307	15.4765	3.39364	142.902	4.08168	0.973138
88	LD10	Gabbro	Sapat mantle	PB-2011	104	PB-2011	PB-2011	40.8049	0.0450332	19.8922	3.83741			0.0613218	13.0002	17.8993	0.154263	0	0.0105397	4.19158	100.167	0.870319	26.9	63.1	1592.7	41	383.1	7.8	20.5	9		238.994	0.093091	0.078133	5.58608	0.007829	0.007434	0.0197885	0.00735796	0.038903	0.097694	0.134937	0.018912	96.7936	0.139804	0.076547	0.393188	0.0204934	0.0777265
89	D104	Gabbro	Sapat mantle	PB-2011	104	PB-2011	PB-2011	47.0215	0.185445	16.2396	5.49269			0.0981188	11.0874	15.9394	1.58462	0.0166802	0.00686832	1.8743	99.6336	0.799954	48.9	149.4	453.4	46.4	175.6	75	21.5	11.8		1058.62	0.069465	0.198444	1.60275	0.005871	0.001914	0.0191572	0.00615739	0.052437	0.210606	0.163132	0.053297	82.4335	0.451989	0.272322	1.44118	0.0911556	0.190594
90	D64	ultramafic	Sapat mantle	PB-2011	104	PB-2011	PB-2011	44.487	0.0592015	1.57377	7.9478			0.13123	33.9422	9.95572	0.079922	0.00296007	0.00592015	1.33324	100.179	0.894295	35.5	90.9	3579.5	108.2	1144.9	10	30.3	3		344.798	0.0120688	0.0255894	0.141416	0.00374664	0.000401696	0.00757302	0.000146851	0.0286736	0.077651	0.053976	0.0215771	2.2056	0.167521	0.10534	0.584912	0.0346679	0.0520399
91	LD5	ultramafic	Sapat mantle	PB-2011	104	PB-2011	PB-2011	39.5114	0.0259659	2.78604	9.54872			0.153872	40.703	2.73604	0	0	0.0067319	3.83091	100.024	0.894118	12.9	38.8	3363.4	135.2	2027.6	23.1	49.5	2.8		117.319	0.0079254	0.010239	0.302978	0.00842092	0.00155376	0.00874908	0.00271346	0.0210548	0.0521674	0.305191	0.00886837	7.43417	0.0641133	0.0496099	0.406821	0.0176988	0.0245815
92	D18	ultramafic	Sapat mantle	PB-2011	104	PB-2011	PB-2011	48.8903	0.0887196	2.65671	5.58836			0.110168	20.3119	19.0474	0.0380227	0	0.00584964	2.50532	99.9733	0.878055	65.3	201.2	4784.1	47.1	393.5	32.1	23.7	3.9		482.417	0.0257438	0.0279499	0.806095	0.00383154	0.00247273	0.0119049	0.00302034	0.0532601	0.0722604	0.365208	0.0202829	9.82475	0.125996	0.118482	0.559612	0.018975	0.0642962
93	G59	gabbro	Sapat Crust	PB-2011	104	PB-2011	PB-2011	48.6661	0.174786	11.3218	9.33533			0.174786	12.8173	14.9246	0.365283	0.0127653	0.0068736	1.79964	99.6659	0.731178	71.5	289.6	393.2	55.5	81.9	83.1	36.5	8.6		1048.54	0.010184	0.051157	0.672499	0.005114	0.00316	0.00740371	0.00190469	0.0115	0.041018	0.082361	0.011282	21.7059	0.115229	0.100059	0.219638	0.0174954	0.0847546
94	G54	gabbro	Sapat Crust	PB-2011	104	PB-2011	PB-2011	47.1255	0.151971	17.588	8.21515			0.151003	9.26249	13.1779	0.96216	0.00967968	0.00774374	3.19893	99.8672	0.690746	50.7	159.3	81	46.2	41.8	72.9	51.4	11.4		925.763	0.111298	0.131358	6.94393	0.004697	0.0040505	0.0111862	0.00172427	0.100774	0.337454	0.347714	0.06697	76.8809	0.488565	0.248345	0.993604	0.0453272	0.190979
95	G49	gabbro	Sapat Crust	PB-2011	104	PB-2011	PB-2011	45.8403	0.257799	16.4327	11.2924			0.222644	7.98297	14.3332	1.17767	0.00683557	0.00781208	2.34682	99.9082	0.583413	51.2	220.6	13	49.6	42	57.2	76	15.2		1597.05	0.101576	0.200301	1.43833	0.00626	0.002527	0.00756575	0.00233303	0.087684	0.145572	0.093093	0.037254	47.3124	0.31492	0.211261	0.427376	0.026117	0.260203
96	G36	gabbro	Sapat Crust	PB-2011	104	PB-2011	PB-2011	48.88	0.127604	9.31896	10.1752			0.197737	14.9092	13.8445	0.150981	0.00389629	0.00681852	2.59965	100.271	0.743767	65.3	217.3	290.9	61.3	118.8	83.2	57.3	6.9		765.476	0.014054	0.030795	0.684111	0.005241	0.011049	0.00983376	0.00104182	0.065397	0.191825	0.089146	0.043657	15.4643	0.362484	0.238916	0.689672	0.0366282	0.138491
97	G11	gabbro	Sapat Crust	PB-2011	104	PB-2011	PB-2011	42.0607	0.117855	21.6351	5.70921			0.111093	9.127	16.4978	0.635644	0.0125583	0.00869422	3.3765	99.3805	0.760017	24.6	71.6	445.2	52.8	207.5	37.4	484.3	14.4		743.571	0.161336	0.189005	2.72627	0.00422463	0.00134953	0.0434441	0.00240972	0.174777	0.433912	0.35481	0.07964	203.302	0.582789	0.259436	1.31578	0.0644041	0.240798
98	G24	Tonalite	Sapat Crust	PB-2011	99	PB-2011	PB-2011	60.4758	0.792639	14.9723	8.23192			0.122996	2.46284	9.23932	0.822899	0.0107377	0.148376	2.37626	99.6583	0.37213	24.3	223.2	5.1	24.6	12.4	19.5	63.9	16.1		5011.5	0.054295	0.0623598	2.58282	0.00683278	0.00185413	0.0362289	0.00279264	0.146533	0.427178	0.109374	0.0919381	81.5009	0.687414	0.33877	0.321746	0.0140303	0.353887
99	G14	Tonalite	Sapat Crust	PB-2011	99	PB-2011	PB-2011	66.5997	0.521394	13.9478	6.2518			0.0993599	1.43629	5.66253	2.97981	0.00688633	0.108214	1.61131	99.2284	0.312772	19.8	119.1	12.9	16.1	12.2	23.6	53.8	17.6		3269.69	0.00623163	0.0560692	6.71102	0.0230278	0.0123537	0.314639	0.0155063	1.4352	4.29894	0.245969	0.71171	99.8973	4.29362	1.55762	2.72333	0.1388	1.05174
100	G32	Tonalite	Sapat Crust	PB-2011	99	PB-2011	PB-2011	68.0207	0.653477	14.3499	4.88876			0.0916642	1.65784	5.83398	2.68882	0	0.168544	1.43333	99.7888	0.401839	15.2	113.6	6.3	13.8	7.2	7	49.1	8.9		4128.35	0.0134801	0.0367326	2.43177	0.00444136	0.00183918	0.433391	0.0170024	0.411622	1.35583	0.662002	0.258839	83.1515	1.87961	0.79493	0.948146	0.0409368	0.754171
101	P7	ultramafic	Sapat Crust	PB-2011	102	PB-2011	PB-2011	52.2881	0.0373128	0.82481	3.89625			0.11292	20.2746	20.3797	0.0667704	0	0.00687342	1.81321	100.272	0.911571	33.4	73.8	3781.2	36.5	230.7	9.7	22.1	2.7		205.73	0.292942	0.052056	0.816195	0.002871	0.001652	0.00404456	0.000216314	0.040486	0.0530245	0.0356075	0.0106895	2.89332	0.068642	0.0367475	0.098067	0.00362673	0.0202432
102	P9	ultramafic	Sapat Crust	PB-2011	102	PB-2011	PB-2011	52.6431	0.0820587	1.85769	5.1697			0.13248	18.0064	21.0298	0.105787	0	0.00593195	1.14015	100.533	0.873419	56.2	159.7	2385.1	43	119.2	26.6	21.3	2.6		491.284	0.278375	0.205842	0.716816	0.004838	0.001395	0.00549655	0.000184946	0.020852	0.0692005	0.0764115	0.0138565	3.80437	0.106746	0.0747805	0.259634	0.0124595	0.0427208
103	P18	ultramafic	Sapat Crust	PB-2011	102	PB-2011	PB-2011	48.8215	0.0393822	0.83279	5.71235			0.120068	24.27	16.3849	0.069159	0.00288163	0.00576325	3.97307	100.692	0.893807	39	85.6	2942.7	70.5	383	7.4	26.9	1.7		215.404	0.0485885	0.014924	0.301975	0.000989	0.000613	0.00578974	0.0017772	0.012038	0.0351835	0.0459425	0.0060405	2.1901	0.047816	0.0334015	0.100479	0.0043171	0.0175636
104	P42	ultramafic	Sapat Crust	PB-2011	102	PB-2011	PB-2011	46.9266	0.127898	3.08254	11.27			0.181855	26.7787	11.6607	0.118905	0.00399682	0.00899283	0.0799947	100.48	0.82478	49.4	148.4	1333.8	104.3	355	255.1	47.1	2.7		732.32	0.0535015	0.208087	3.09845	0.008293	0.0027	0.014006	0.000583065	0.046705	0.143972	0.178126	0.0292225	9.99977	0.226607	0.137873	0.861263	0.0350504	0.0777975
105	P51	ultramafic	Sapat Crust	PB-2011	102	PB-2011	PB-2011	45.4964	0.107076	9.50101	8.13975			0.134836	21.2853	13.8951	0.244887	0.0208203	0.0109059	0.854926	99.9178	0.838197	45.4	128.8	1315	86	287.3	124.4	32.9	5.5		594.883	0.178655	0.257193	2.86069	0.028568	0.011552	0.0515197	0.00622591	0.043732	0.131455	1.83114	0.0254225	28.8428	0.187308	0.109572	0.976924	0.0322334	0.0763361
106	P31	ultramafic	Sapat Crust	PB-2011	102	PB-2011	PB-2011	43.3324	0.0891972	19.5739	5.99366			0.10471	10.8888	16.5703	0.453742	0.0164821	0.0184212	3.05252	100.196	0.782561	30.8	85.2	612	49.7	124	23.5	34.8	10.7		517.243	0.109874	0.215023	2.76015	0.005884	0.0047785	0.0131578	0.00321153	0.089334	0.217516	0.381305	0.036925	95.6931	0.235808	0.107589	0.705596	0.0295833	0.102637
107	KH97-118*	mafic	SPC Mafic	US-2002	98.9	BD-2009	BD-2009	53.15	1.05	16.7	8.95			0.16	4.81	9.45	2.41	0.45	0.17	1.12	98.42	49	33	221	61		16					-	0.11	2.51	139	0.42	0.13	1.78	0.12	6.65	15.5	2.88	2.1	238	10.3	2.8	43		1.09
108	KG-07	mafic	SPC Mafic	US-2002	98.9	BD-2009	BD-2009
109	KG-11*	mafic	SPC Mafic	US-2002	98.9	BD-2009	BD-2009	53.49	0.84	16.62	9.12			0.17	4.93	9.1	2.32	0.34	0.09	1.08	98.1	49	33	301	94		20					4081	0.09	1.02	71.7	0.17	0.09	0.6	0.04	4.18	9.77	1.7	1.36	256	6.75	1.99	35.8		0.79
110	KG-30	mafic	SPC Mafic	US-2002	91.8	BD-2009	BD-2009	58.48	0.59	18.19	5.17			0.11	2.58	7.17	4.15	0.5	0.22	1.44	98.6	47	11	137	121		14					3360	0.15	4.04	172	0.13	0.09	2.39	0.13	7.27	18.4	3.61	2.56	641	11.7	2.62	127		0.9
111	KG-31	mafic	SPC Mafic	US-2002	91.8	BD-2009	BD-2009	56.98	0.57	18.94	5.92			0.15	2.7	7.4	3.84	0.43	0.22	1.87	99.02	45	10	104	247		17					3175	0.14	3.58	130	0.14	0.04	2.81	0.13	8.52	21.2	2.99	2.91	426	13.4	2.95	94.3		1.02
112	KG-50*	granitoid	SPC Mafic	US-2002	97.1	BD-2009	BD-2009	67.88	0.21	16.56	2.35			0.06	0.86	4.52	3.88	1.15	0.09	1.54	99.1	39	2	30	39		3					1415	0.51	44	516	2.08	0.32	1.82	0.09	11	20.3	2.6	2.02	332	7.44	1.11	73.7		0.58
113	KG-18	mafic	SPC Mafic	DB-2011	100.9	BD-2009	BD-2009	50.78	1.04	18.12	10.31			0.21	4.93	9.8	2.59	0.29	0.19	0.15	98.41	46	36	276	40		9					6039	0.01	0.65	86.9	0.06	0.03	2.28	0.12	9.38	24.1	2.03	3.37	291	16.3	4.15	68.2		1.35
114	UM01-133	mafic	SPC Mafic	DB-2011	84.3	BD-2009	BD-2009	52.08	0.72	19.01	7.34			0.15	5.72	10.06	3.07	0.42	0.1	0	98.67	58	21	132	72		48					3936	0.13	3.25	118	0.25	0.06	1.41	0.1	6.46	14.3	3.54	1.9	604	8.8	2.14	31		0.84
115	UM01-134	mafic	SPC Mafic	DB-2011	84.6	BD-2009	BD-2009	54.66	0.9	16.34	7.7			0.16	5.33	8.1	3.21	0.52	0.18	1.53	98.63	55	25	220	257		75					5843	0.15	1.41	145	0.06	0.02	2.78	0.2	9.26	20.4	4.52	2.56	288	11.6	2.77	90		0.95
116	UM01-135	mafic	SPC Mafic	DB-2011	81.1	BD-2009	BD-2009	51.16	0.82	16.16	8.4			0.18	6.99	9.18	2.86	0.36	0.11	2.04	98.26	60	27	206	164		108					4820	1.24	1.26	101	0.06	0.02	2.14	0.14	6.08	14.1	4.38	1.96	349	9.4	2.47	70		0.89
117			Lherz_lense		116	BD-2009	BD-2009
Data source:
			PB-2013	Bouilhol et al. 2013
			SH-2007	Heuberger et al. 2007
			US-2002	Schaltegger et al. 2002		Italic means data from the reference provided	Italic means data from the reference provided
			BD-2006	Dhuime et al. 2006		Italic & underlined ages means estimated age from reference provided	Italic & underlined ages means estimated age from reference provided
			SH-2007	Heuberger et al. 2007
			DB-2011	Bosch et al. 2011
			PB-2011	Bouilhol et al. 2011
			BD-2009	Dhuime et al. 2009
Karakoram Samples:
	01B-16	Karakoram			130	SH-2007	SH-2007	57.6	0.5	16.88			5.44505	0.09	3.07	6.3	4.79	1.55	0.25	1.52	97.9951	0.501126		145	158	17	25	71	42	17			0.17	21.59	1440.86	5.42	1.274	6.44	0.402	19.08	32.88	4.06	3.5	589.48	13.16	2.56	90		0.8
	01A-50b	Karakoram			107	SH-2007	SH-2007	69.46	0.3	15.1			1.77302	0.03	0.73	2.43	2.71	5.74	0.06	1.2	99.533	0.423149		44	126	6	6	8	20	14			0.63	117.68	853.4	11.87	2.205	8.17	0.643	21.32	32.1	6.86	2.95	282.5	9.7	1.65	128		0.44
	sh25-00 XRF	Karakoram			107	SH-2007	SH-2007	55.5	0.77	18.49			6.52507	0.15	3.52	7.67	3.51	1.51	0.22	1.08	98.9451	0.490087		147	95	23	16	20	72	18				60	693.67	4		9		23	33	12		537	18		105
	01B-04	Karakoram			104	SH-2007	SH-2007	69.85	0.44	15.14			2.08802	0.05	0.8	1.85	4.11	3.6	0.13	0.91	98.968	0.405686		288	36	35	12	125	102	15			1.3	91.39	382	13.98	1.857	15.63	1.004	35.4	66.45	18.46	6.52	353.77	21.46	3.15	137		0.73
[truncated: 62 more columns]

## Sheet: Sample list
Table 5 Sample list
Ladakh BATHOLITH
LB-11-O-36	N34.83696	E76.816994
KOHISTAN BATHOLITH
SU-01-8	Coarse-grained biotite leucogranite, Indus-Gilgit confluence, Kohistan
SU-01-9	Fine-grained biotite-granite, 300 m north of Indus-Gilgit confluence, Kohistan
SU-01-10	Diorite intruded by leucogranite and aplite, same locality as 9
SU-01-11	Granodiorite, Jutal, Hunza valley
SU-01-12	Matum Das tonalite, Rahimabad village, Hunza valley
01A-07 a)	Granitic dyke
01B-22 a)	Granitic dyke
01B-24 a)	Gabbro
01B-25 a)	Diorite
JIJAL
90/02/01	Sarangar Gabbro,, 2 km ENE of Patan along the Karakorum Highway
91/07/01	Diorite, 1 km S of the bridge at Kiru along the Karakorum Highway
91/08/01
KARAKORUM
01A-50b a)	Granitic dyke
01B-04 a)	Granite
01B-16 a)	Quartz monzodiorite, Tar Gol
sh25-00 a)	Diorite
JPB95.29.II.98	Granite, Hunza valley
JPB95.30.00	Diorite, Hunza valley
INDIAN PLATE
00/30/14	Diorite from the Indian Plate, 100 m south of Duber Bazar along the Karakorum Highway
a) from Heuberger (2004)

## Sheet: New WR composition dated rocks
Tab. 1
	SU-01-8	SU-01-9	SU-01-10	SU-01-11	SU-01-13	900201*	910701*	910801*	C75	C220 **
	Leuco-granite	Biotite-Granite	Diorite	Grano-diorite	Tonalite	Gabbro	Diorite	Granite	Tonalite	Diorite
	--------- Indus confluence ------			Jutal	Matum Das	--- Jijal metaplutonic complex ---			--- Chilas complex ---
SiO2 [%]	71.8	68.8	56.07	63.5	60.99	45.8	56.17	74.05	70.45	55.37
TiO2	0.14	0.37	0.77	0.61	0.5	1.27	0.55	0.05	0.234	0.82
Al2O3	15.96	17.76	17.35	18.05	18.5	19.11	18.52	14.74	16.02	17.78
Fe2O3	1.03	2.05	7.26	4.14	5.76	11.84	6.31	0.85	2.29	8.86
MnO	0.02	0.03	0.15	0.07	0.18	0.14	0.14	0.15	0.053	0.15
MgO	0.2	0.73	3.41	1.76	1.73	5.13	2.66	0.17	1.07	4.49
CaO	1.95	3.38	6.76	4.48	6.37	10.49	7.93	2.01	4	8.52
Na2O	3.75	4.54	3.41	4.49	3.57	3.32	4.27	3.64	4.56	2.91
K2O	4.23	2.39	2.96	2.14	0.85	0.19	0.36	1.77	0.78	0.77
P2O5	0.02	0.12	0.27	0.24	0.19	0.34	0.22	0.06	0.05	0.14
LOI	0.06	0.25	0.62	0.46	0.43	1.53	1.78	1.19	0.37	-0.16
Sum	99.15	99.87	99.02	99.93	99.08	99.16	98.91	98.68	99.877	99.65
Nb [ppm]	3.68911	5.94734	7.95637	7.46967	3.18168	1.8	2.96	6.31	1.1976	3
Zr	103	131	108	139	78	41	104	48	82.9604	88
Hf	7	8	6	7	4	--	--	--	2.2991	2.7
Y	3	6	25	11	21	28	20	11.37	1.92254	20.1
Sr	353.98	613.46	652.67	924.78	507.12	353	428	195	430.808	333
U	0.331052	0.957912	0.729722	1.97595	0.394452	0.07	0.04	0.42	0.078557	0.07
Th	7.48009	15.122	2.73459	8.80189	1.89829	0.18	0.15	1.49	0.405523	0.23
Rb	75.7508	64.8098	86.2058	76.8118	36.3888	0.85	2.69	50.78	11.067	7
Pb	25.7755	19.8205	12.8195	13.1335	2.68844	29.7	4.4	73.3	b. d. l.	b. d. l.
Ba	1144	765	888	577	118	67	108	1123	315.578	153
Ga	16	19	16	17	16	15	14	10	14.99	18
Zn	27	43	75	67	79	80	69	35	b. d. l.	64
Cu	24	7	79	26	12	73	7	b. d. l.	b. d. l.	49
Ni	2	2	14	12	b. d. l.	b. d. l.	b. d. l.	b. d. l.	b. d. l.	22
Co	3	5	15	7	10	--	--	--	4.57972	26
Cr	95	11	30	22	6	b. d. l.	b. d. l.	b. d. l.	24.0679	29
V	12	46	166	90	66	194	75	b. d. l.	20.9742	186
Cs	1.28362	1.93412	5.21042	3.76572	0.932414	0.1	0.1	1.1	0.223107	b. d. l.
Ta	0.200544	0.472768	0.375152	0.496691	0.188497	0.07	0.12	0.52	0.059364	0.26
La [ppm]	10.3447	33.7297	28.6197	29.0447	10.5537	5.2	8.62	6.44	8.61933	11.5
Ce	20.0909	57.3289	54.8019	54.8249	24.9699	14.81	21.52	13.36	14.3297	22.6
Pr	2.15309	5.52039	6.19369	5.87839	3.19099	2.31	2.89	1.51	1.45657	2.89
Nd	7.64122	18.0941	24.7321	21.4551	13.8001	12.9	13.31	5.83	4.69506	12.1
Sm	1.24186	2.40586	4.90836	3.34056	2.90336	3.72	2.95	1.23	0.702565	3.1
Eu	0.447104	0.589328	1.38382	0.903226	0.953525	1.23	0.96	0.27	0.544995	1.06
Gd	0.766079	1.44185	4.34475	2.33036	2.73321	4.32	2.87	1.29	0.44379	3.22
Tb	0.0817701	0.181389	0.663859	0.308824	0.45448	0.75	0.47	0.22	0.063669	0.6
Dy	0.327566	0.863489	3.69304	1.5961	2.84177	4.59	2.89	1.39	0.331685	3.66
Ho	0.0540156	0.163138	0.774206	0.313589	0.639217	1.01	0.65	0.3	0.064066	0.77
Er	0.12363	0.415962	2.13395	0.828033	1.87127	2.88	1.9	0.81	0.20288	2.06
Tm	0.0167296	0.0631639	0.300573	0.118046	0.279663	0.41	0.29	0.13	0.030515	0.343
Yb	0.0948414	0.382467	1.96649	0.741402	1.83546	2.39	1.89	0.91	0.239832	2.16
Lu	0.0151459	0.056466	0.312202	0.117362	0.282402	0.38	0.3	0.15	0.04263	0.319
* data from Zeilinger (2002)
** data from Jagoutz et al. (2004)

## Sheet: New KLA Bath WR Data
		BOU PK	BOULB0		BOULB0	BOULB0	BOULB0	BOU LB	BOU	BOULB0	BOULB0	BOULB0	BOULB0	BOU LB			BOU PK						BOU LB	BOULB0	BOULB0	BOU LB		BOULB0	BOULB0						BOU PK								Pja-2	PGLT 57.1	BOU	BOU LB	BOU LB	URS data
		06-11	9-213A	Ko8-3	9-227A	92311A	9-52B	08-12	LB08-7	9-48	9-30	9-245	9-167A	08-25	PGUP-9	PGUP-16	05-39	PGLT-19	PGAK-26	PGUP-15	PBa-04	PBa-15	08-31	9-166A	9-33	08-23	Ko8-13	9-114A	9-115	O1A-07	O1B-22	O1B24	PGAK-13,1	PGAK-18,5	06-36	Ko8-4	PJa-04	LB11-010	LB11-016	LB11-S36	PK05-20	PK05-16	3.94633e+06	3.97309e+06	LB08-4	08-36	08-38		SU-01-8
Location (UTM-WGS1984)	Northing	3869906	3828865	3942112	3822477	3810450	3760463	3826627	3787912	3768552	3808235	3798089	3.77417e+06	3774936	4003763	4006683	3938738	3989516	4002072	3998723	3988739	3998126	3796128	3769896	3819161	3824622	3956536	3714094	3716910	3930468	3931657	3922976	4008937	4008678	3892534	3961913	3952766				3874950	3882204	465077	440751					Leuco-granite
	Easting	509255	594044	362876	636965	659724	758794	603150	723697	749877	683825	695491	771835	740850	334840	342237	528932	422611	386266	347648	356574	349040	739770	769686	683181	647205	379587	792703	792261	209417	208900	206395	384570	384781	556405	354739	466314				538460	507148	DO NOT USE. AGE MOSTLIKELY WRONG. DATA not updated						--------- Indus confluence ------
crystallization	age	102.1	98.6	76.9	72	62.7	61.8	58.5	58.1	53.4	53.3	51.5	51.6	50.3	58.9	83.5	86	64.8	72.1	58.8	61.3	72	59.5	60.9	66	48.1	50.4	39.81	29.64	37.2	39.9	40.9	47.9	51.5	46.3	31.66	30.1	21.5	25.1	68.5	42.1	41.5							30.36
	SiO2	73.9499	67.6483	70.9844	76.333	70.516	76.5035	59.4789	77.1471	60.2325	61.9156	72.9216	68.5473	72.1379	71.0299	66.2527	66.7099	62.3068	63.7975	74.0954	68.1446	58.2129	74.2058	68.2509	72.9275	62.2039	65.7331	70.4022	71.3462	70.22	69.83	46.43	60.5249	59.07	68.8306	64.9991	70.7676						49.5879	75.053	44.363	58.1749	76.274	SiO2 [%]	71.8
	TiO2	0.302465	0.375661	0.367547	0.0873492	0.424386	0.111522	0.94902	0.112427	0.809001	0.885793	0.253123	0.455979	0.295545	0.349745	0.433121	0.375408	0.812857	0.609107	0.159125	0.546502	1.22001	0.215026	0.56781	0.25401	0.659023	0.478711	0.392205	0.302575	0.33	0.38	1.1	0.732834	0.539	0.413216	0.61382	0.282632						2.87863	0.048	0.706237	1.27264	0.131839	TiO2	0.14
	Al2O3	13.7191	16.8657	15.5555	12.4386	14.7972	12.2701	16.5555	12.1337	17.0142	16.4019	14.2919	15.291	14.3134	14.429	15.5586	15.4057	16.6	16.6681	13.7424	15.3638	16.499	13.7141	15.6818	14.1922	15.6718	17.5052	15.1446	14.536	15.59	14.88	20.99	16.7219	19.879	14.917	17.0325	15.3537						19.5783	14.204	11.945	16.1144	12.1937	Al2O3	15.96
	Fe2O3	0.262981	0.299854	0.304995	0.0865614	0.343171	0.0843453	0.689855	0.0570753	0.643774	0.619011	0.1693	0.345165	0.163297	0.244424	0.350073	0.362355	0.539387	0.476274	0.109498	0.42665	0.804885	0.127101	0.376288	0.197173	0.45198	0.393772	0.231288	0.172509	0.276	0.267	1.218	0.67029	0.433369	0.342793	0.507099	0.189782						0.840069	0.0647	1.1598	0.571605	0.128818	Fe2O3	1.03
	FeO	2.12969	2.4283	2.46993	0.700998	2.77909	0.683051	5.58664	0.462211	5.21346	5.01292	1.37104	2.79524	1.32243	1.97941	2.83499	2.93445	4.36811	3.857	0.886743	3.45513	6.51818	1.0293	3.04728	1.59676	3.66026	3.18887	1.87304	1.39703	2.23512	2.16224	9.8637	5.42819	3.50954	2.77604	4.10663	1.5369						6.80311	0.523958	9.39236	4.62902	1.04321
	FeoTot	2.36611	2.69787	2.74412	0.778817	3.0876	0.758878	6.20682	0.513522	5.79221	5.56941	1.52324	3.10554	1.46923	2.19915	3.14971	3.26021	4.85302	4.28517	0.985181	3.83869	7.24177	1.14356	3.38557	1.77402	4.06659	3.54288	2.08096	1.55211	2.48325	2.40227	10.9587	6.03078	3.89914	3.08421	4.56251	1.70752	0	0	0	0	0	7.55834	0.582124	10.435	5.14289	1.15901	FeoTot	0.92597
	MnO	0.0651717	0.0686842	0.0617559	0.035597	0.0915224	0.0488339	0.127808	0.0262883	0.139649	0.107747	0.0537342	0.102847	0.0444448	0.0665707	0.0645708	0.0715374	0.108315	0.124996	0.0735952	0.0617179	0.132783	0.055986	0.110407	0.0560051	0.0873223	0.0693784	0.0554374	0.0314836	0.05	0.04	0.16	0.141197	0.105	0.0695871	0.0976531	0.02687						0.130472	0.084	0.219824	0.102395	0.0389083	MnO	0.02
	MgO	0.47617	1.23936	1.15842	0.0934049	1.06805	0.110974	3.26236	0.0610247	2.82194	2.43718	0.51538	1.19913	0.520429	0.669681	2.11693	2.77837	1.98941	1.77177	0.18001	1.10395	2.85633	0.339606	1.18484	0.533418	2.28356	1.31323	0.847965	0.463409	0.76	0.77	3.87	2.59624	2.299	0.958419	1.80459	0.509534						4.67096	0.012	16.4179	3.98597	0.165924	MgO	0.2
	CaO	2.78472	4.57772	3.84182	0.692469	3.35414	0.810385	6.63013	0.525939	5.99847	5.13914	1.93403	3.34478	1.71991	2.32103	4.15439	4.76215	4.73802	4.47505	0.843361	5.60638	5.91334	1.64495	3.66718	2.05833	4.62656	5.58298	2.31446	1.52976	2.58	2.92	11.69	6.05458	6.626	2.68876	5.64196	2.45114						9.94205	1.633	8.01017	5.94702	0.618079	CaO	1.95
	Na2O	4.49803	4.65421	4.23028	4.15705	4.23226	3.33551	3.71734	2.88366	4.10366	3.59349	3.86814	4.38456	3.83031	4.17905	4.27161	3.94035	4.4727	4.39172	4.22277	3.54978	4.02542	4.17692	4.77689	3.98252	4.38443	3.27367	4.20312	3.42858	3.41	3.24	2.11	3.96546	4.813	3.26873	3.15778	4.05239						3.60025	5.899	1.31325	4.14582	3.90607	Na2O	3.75
	K2O	1.14158	1.05948	1.10762	3.71575	1.56824	4.65643	1.43804	5.63884	1.31999	2.93557	3.83909	2.34809	4.15534	3.19341	2.19541	1.54001	2.21399	1.69935	4.29338	0.380262	2.16546	3.41107	1.60573	3.3646	3.6039	1.83258	3.36478	4.78655	3.84	2.98	0.39	1.4428	1.714	4.12299	1.78765	3.38164						0.67219	1.114	0.425499	2.34891	3.52112	K2O	4.23
	P2O5	0.066231	0.117538	0.103591	0.0196013	0.123753	0.0193224	0.19704	0.00903016	0.211172	0.242257	0.0731562	0.139749	0.0831383	0.100353	0.147023	0.124938	0.269296	0.221223	0.0358031	0.1095	0.296515	0.0531257	0.178354	0.0783752	0.446161	0.137766	0.188264	0.141382	0.13	0.12	0.09	0.229694	0.302	0.108712	0.138508	0.0905618						0.236125	0.014	0.212929	0.40243	0.0222	P2O5	0.02
	H2O	0.33	0.492958	0.397073	0.254731	0.597116	0.282545	0.36	0.2	1.02967	0.256674	0.593681	0.281889	0.46	0.637	0.656	0.69	0.626	0.791	0.543	0.453	0.162	0.17	0.288511	0.380815	0.63	0.894737	0.533163	0.646073	0	0	0	0.563	0	0.6	0.356436	0.478						0.43	0.23	3.56	1.64	1.03	LOI	0.06
	Total	99.6994	99.7975	100.552	98.6063	99.8602	98.908	98.923	99.2515	99.4725	99.4848	99.8671	99.2008	99.0297	99.1749	99	99.6585	98.9904	98.835	99.1741	99.1581	98.7255	99.1301	99.6979	99.6018	98.6632	100.364	99.5271	98.7641	99.3932	97.5623	97.7887	99.0035	99.2461	99.0622	100.193	99.1015	0	0	0	0	0	99.2852	98.8731	97.6088	99.2774	99.0608	0	99.056
	XMg-FeOTot	0.26392	0.450084	0.42926	0.176056	0.381302	0.206688	0.48359	0.174728	0.46467	0.438091	0.376095	0.407561	0.386913	0.351719	0.544926	0.60291	0.422083	0.424177	0.245588	0.338788	0.412705	0.346019	0.384053	0.348835	0.500116	0.397735	0.420624	0.347232	0.352865	0.36349	0.386193	0.434067	0.51231	0.356352	0.413381	0.34711	#DIV/0!	#DIV/0!	#DIV/0!	#DIV/0!	#DIV/0!	0.524043	0.0354259	0.737059	0.579982	0.203224		0.277882
	Sample ID	06-11	LB09-21.3A	Ko8-3	LB09-22.7A	LB09-23.11A	LB09-5.2B	LB08-12	LB08-7	LB09-48	LB09-30	LB09-24.5	LB09-16.7A	LB08-25	PGUP-9	PGUP-16	05-39	PGLT-19	PGAK-26	PGUP-15	PBa-04	PBa-15	LB08-31	LB09-16.6A	LB09-33	LB08-23	Ko8-13	LB09-11.4A	LB09-11.5	O1A-07	O1B-22	O1B24	PGAK-13,1	PGAK-18,5	06-36	Ko8-4	PJa-04						Pja-2	PGLT 57.1	LB08-4	LB08-36	LB08-38
	Sc	5.8	5.4	7.3	3.9	10.1	3.4	21.8	3	18.8	14.1	3.8	8.4	3.3			11.1						3.3	12.9	3.8	8.8	4.2	5.7	3.5	4.08955				9.6	8	12.7							37.7		26.04	14.4	2.7
	V	20.2	46.5	55.1	4.5	53.4	5.3	184.4	4.8	154.6	137	21.3	61.5	23.7	28.3	69	92.2	94.5	85.6	10	86.1	182.7	13.8	55.4	18.6	100	41.1	41.8	25.8	40	38	418	143.7	64.9	47	50.8	28						255	0	170.38	150.6	6.5	V	12
	Cr	4.1	22.5	6	13.9	12.2	10.4	29.3	2.9	16.8	24.4	6.1	12.8	4.2	0.5	57.3	90.7	8.8	13.4	2.3	3.8	6.2	4.7	12.5	7.8	38.5	4.2	14	8.5	169	77	54	4.6	1.9	8.1	14.9	0						3.8		375.2	91.8	5.1	Cr	95
	Co																																															Co	3
	Ni	1.9	9.3	14.7	6.3	5.7	5.7	11.2925	0.216721	10.7	13.7	3.9	5.9	0.266073	3.2	31.1	34.8	14	10.5	5.5	4	14	0	6	4.2	19.0424	8.4	9.3	4.8	7	3	5	9.1	4.3	4.5	14.3	2.4						7.1		160.939	65.9093	0	Ni	2
	Cu	0.4	1.6	4.3	0	0.3	0.4	66.2	0	19.9	26.6	1.5	3.1	0	1.57333	3.68267	29.3	10.2913	16.6647	1.296	10.8	16.993	0	4	1.4	7.3	4.4	26.6	1.1	10	24	119	7.935	56.7	2.2	24.4	21.3963						9.5	0	45.5	27.1	1.3	Cu	24
	Zn	28.3	54.9	30.2	14	54.3	21.2	83.7	6.2	73.4	67.3	15.6	47.8	27.8	27.7	37.5	44.1	56.7	74.7	12.8	28.4	78.4	15.8	52.7	32.5	63.8	67.7	73.8	53.4	51	52	77	63.3	56.1	43.6	79.6	54.8						63.7	13.52	122.08	63.9	28.2	Zn	27
	Ga	14.4	18.2		12.3	15.3	10.1	18.5	10.4	19.1	19.3	12.9	16.3	14			15.2						14.2	17.8	14.1	18.5		22.8	22.9					16.3	15.5								20.7	17.57	12.18	17.1	10.5	Ga	16
	Cs	0.819746	0.843629	0.147691	2.63921	2.48238	0.590667	5.06703	0.493049	1.15354	11.2586	2.5977	1.70439	2.80903	2.9556	1.47089	1.44339	1.81298	4.28536	4.4926	1.32808	5.65764	1.01579	1.35122	3.17802	3.94932	10.7562	30.8501	13.9905	3.53376	0.55	0.25	1.71075	3.09578	19.9127	8.10481	0.825444						0.557989	1.5798	0.462787	0.891377	2.83498	Cs	1.28362
	Rb	31.6719	30.1602	21.1	112.596	52.8188	92.4239	42.72	103.298	35.2209	117.58	124.371	64.7214	109.966	79.9934	53.0392	38.9904	81.8266	62.1997	133.523	12.9736	76.8411	94.2857	67.6872	110.189	124.044	85.8789	252.806	305.51	96.6214	65.79	4.99	49.0364	66.312	174.375	139.392	67.612						9.84735	66.6156	11.6431	41.2267	87.4195	Rb	75.7508
	Ba	219.923	288.272	376.101	561.477	266.761	325.715	238.238	329.127	354.441	470.664	585.049	515.899	566.288	365.759	304.805	353.342	362.459	289.302	413.019	111.081	237.1	467.286	245.064	538.381	2544.37	243.848	712.698	627.701	986.288	1066.56	56.25	234.25	490.288	628.129	1131.84	1619.11						165.635	2.26597	89.5271	278.719	557.294	Ba	1144
	Th	6.50127	2.44326	0.414765	11.125	6.57318	15.5448	3.12903	12.6736	1.19353	13.1007	19.9361	6.937	13.122	11.1193	6.35825	2.46364	5.18137	4.97418	14.758	1.74915	8.93696	10.741	4.94643	15.2483	70.0171	15.0143	29.2778	42.6333	14.0512	10.58	1.43	4.17785	8.08201	22.9986	39.9824	21.8251						0.783667	32.8923	2.43824	6.83839	10.2494	Th	7.48009
	U	0.961233	0.48587	0.134593	2.01007	1.53241	0.809242	0.701749	0.708902	0.330302	2.90076	2.95899	1.46281	1.28779	2.9698	1.39059	0.872711	1.58363	1.85158	1.39122	0.613044	1.52148	1.9404	2.0643	3.20581	8.01164	1.50247	6.01033	8.82778	1.17926	0.183	0.284	0.932554	1.60546	2.77492	6.84388	3.39302						0.21781	38.7647	0.473875	1.99967	2.03697	U	0.331052
	Nb	3.01291	3.62435	3.14022	4.39978	4.16458	3.68212	2.78105	3.08161	4.77707	6.58458	5.29746	4.71672	6.13897	5.86809	3.63462	2.71097	19.4622	5.53499	9.33256	1.30629	8.87686	6.84338	13.7133	7.90712	16.4309	5.8272	11.9627	11.6877	10.7598	6.48	2.18	4.75987	1.89128	7.84806	10.1092	2.81552						11.819	50.2022	2.45469	15.8777	8.6615	Nb [ppm]	3.68911
	Ta	0.271282	0.219819	0.190837	0.476321	0.317076	0.20678	0.184297	0.20167	0.265529	0.433241	0.481024	0.357508	0.563435	0.599627	0.363243	0.208177	1.30678	0.497269	1.24171	0.108608	0.696234	0.605356	1.0053	0.91815	0.97116	0.44366	1.3339	1.53432	0.754912	0.153	0.131	0.315966	0.135319	0.761741	0.595096	0.198192						0.765961	6.90149	0.129408	1.15551	0.804054	Ta	0.200544
	La	25.2227	10.043	13.788	19.8931	14.6719	25.8772	10.9917	23.5249	17.5851	25.5901	25.3011	19.6652	23.2352	20.9763	15.6494	7.55052	23.2656	14.0855	19.2617	8.55092	24.9053	18.3048	14.1325	28.8298	83.0542	39.1557	39.5787	51.7254	37.5219	42.59	4.92	21.0738	32.257	30.1276	36.0824	36.0228						17.3512	5.19958	12.1942	24.4307	20.4988	La [ppm]	10.3447
	Ce	42.7248	18.6438	24.1596	40.2558	28.5786	46.4893	26.2036	41.6923	38.1886	53.8694	46.619	37.2843	47.0835	39.1683	29.293	15.1899	42.9842	30.3246	36.2137	14.1051	54.0544	34.6481	31.6848	49.7852	144.165	75.2935	71.9289	97.0618	67.1513	76.09	11.51	44.2277	50.91	58.413	64.0589	60.0216						44.9203	11.477	24.6098	49.4802	44.2209	Ce	20.0909
	Pb	3.59402	5.72089	6.12551	19.6618	8.45046	18.062	9.09698	11.1658	5.32756	9.08999	12.2995	6.51519	12.971	8.02696	3.93783	6.42172	9.85665	9.76947	14.9344	3.85524	10.3519	8.27322	7.95877	13.0404	71.8134	16.9964	56.2873	69.4907	24.7861	13.52	3.37	6.87297	9.30386	18.9397	71.6476	24.6316						6.82394	27.9008	27.0513	5.61956	15.7868	Pb	25.7755
	Pr	4.42467	2.13546	2.60062	4.72706	3.27297	4.74943	3.72578	4.18269	4.8049	6.46982	4.90058	4.24495	5.44819	4.4424	3.2388	1.90114	4.91202	4.06007	3.90071	1.63686	6.85343	3.74286	4.32025	5.08752	15.0412	8.13145	7.50973	10.4355	7.28044	7.18	1.54	5.39476	5.28525	6.43258	6.57428	6.06562						6.69248	1.53502	3.01255	5.95051	4.42096	Pr	2.15309
	Sr	174.169	528.114	303.226	44.6631	245.716	58.8896	391.427	43.2572	451.023	408.412	244.902	316.019	268.457	201.812	484.95	513.839	442.586	441.776	72.838	456.204	356.474	163.545	305.609	206.935	1113.64	390.763	472.703	262.835	680.769	396.16	392.75	496.493	847.32	250.972	796.687	614.455						558.29	16.8947	149.676	526.176	85.912	Sr	353.98
	Nd	15.4544	8.18946	9.54216	17.1964	11.9699	15.2537	16.6815	13.375	19.5729	24.5663	16.3171	15.6981	18.9894	15.9942	11.5964	7.92343	18.5758	17.4601	13.0492	6.65205	27.8731	13.0767	18.1081	16.7968	51.9717	28.8213	25.135	34.1367	24.9842	23.09	6.95	21.2245	19.2565	23.037	21.3478	19.5436						31.3654	6.19874	12.5845	23.2235	15.7489	Nd	7.64122
	Sm	2.57802	1.73196	1.80763	4.0952	2.53528	2.6474	4.20526	1.93402	4.32777	5.03469	2.90625	3.25303	3.32746	3.32456	2.12826	1.76186	3.92658	4.05624	2.86106	1.47383	6.38445	2.58684	4.8279	3.02969	8.83298	4.70309	3.89272	5.80333	4.09028	2.94	1.76	4.64059	3.48287	4.64283	3.08031	2.88853						8.73952	2.37215	2.99497	4.84224	3.27475	Sm	1.24186
	Zr	169.058	132.818	126.792	92.462	150.594	69.1897	126.37	82.945	160.455	328.037	138.466	150.539	180.211	174.755	103.24	74.1672	218.304	185.952	84.5137	313.617	239.393	111.106	197.799	144.689	251.877	128.036	138.193	156.019	147.285	212	30	142.596	171.561	193.447	120.942	159.139						103.248	118.604	58.7515	222.124	137.157	Zr	103
	Hf	4.52502	3.49654	3.17929	3.53885	4.08163	2.10032	3.79188	2.53198	4.13638	8.34786	3.73664	3.96302	4.97765	4.56532	2.57806	2.1078	4.71801	4.81212	3.00461	6.91854	5.84984	3.20206	5.18006	3.96943	6.48204	3.43761	3.97973	4.67016	3.8955			3.56661	4.05298	5.44081	3.4546	3.8537						3.00022	6.73122	1.57519	5.07684	3.89968	Hf	7
	Eu	1.25152	0.689872	0.775754	0.309659	0.800841	0.308188	1.0731	0.444541	1.19556	1.28777	0.700105	0.932415	0.724904	0.79612	0.701225	0.582048	1.24209	1.24396	0.440196	0.730684	1.68229	0.761085	1.25383	0.69661	2.0934	1.09532	0.816385	0.814043	1.07094	0.77	0.68	1.34379	1.29495	0.861415	0.673224	0.758881						3.02537	0.226222	0.984161	1.39184	0.567711	Eu	0.447104
	Gd	2.12532	1.51065	1.62952	4.26296	2.60055	2.00019	4.17279	1.18342	4.18301	4.48332	2.3281	2.90476	2.50224	3.04607	1.73317	1.59547	3.56226	3.72665	2.70515	1.50545	6.26126	2.42017	5.1405	2.55323	5.80492	3.09477	2.53197	3.72714	2.4593	1.7	1.77	4.13989	2.91476	4.04143	1.6448	1.51067						9.33011	3.13464	2.91773	4.34074	3.18515	Gd	0.766079
	Tb	0.32081	0.234916	0.254439	0.831225	0.456742	0.272478	0.696266	0.145562	0.700161	0.693157	0.379297	0.488435	0.366934	0.529917	0.262713	0.252875	0.561983	0.621121	0.508893	0.245996	1.05179	0.423225	1.00288	0.408884	0.714333	0.409244	0.348604	0.530804	0.307537	0.201	0.305	0.67202	0.430836	0.670776	0.202868	0.163364						1.56929	0.673404	0.445488	0.690533	0.554872	Tb	0.0817701
	Dy	1.91819	1.39957	1.50628	5.58297	2.84924	1.38863	4.23656	0.75008	4.19621	4.10779	2.2583	2.98589	1.97871	3.41799	1.51234	1.44649	3.37671	3.87991	3.50496	1.55572	6.47996	2.70169	6.70244	2.629	3.39984	1.99791	1.78742	2.68294	1.49191	0.85	1.89	4.07673	2.56034	3.98767	0.984097	0.775546						9.81852	4.98845	2.625	3.89706	3.53831	Dy	0.327566
	Y	12.5489	7.22082	7.98624	34.4052	16.6673	6.45796	21.9372	4.44863	22.0473	21.61	13.0894	16.7714	10.9951	20.4725	7.84099	8.36076	17.564	21.2154	22.3582	8.90873	34.6774	16.8581	37.7199	15.7305	16.0763	9.14706	8.67775	11.4214	6.63585	3.54	10.15	21.9513	12.5105	22.2163	5.1088	3.47613						48.9719	34.7094	12.6905	19.2926	21.1693	Y	3
	Ho	0.410072	0.279549	0.303933	1.20885	0.616674	0.242716	0.863934	0.156171	0.853788	0.824826	0.468614	0.613063	0.387306	0.730592	0.29259	0.283998	0.670025	0.805084	0.752077	0.336493	1.33085	0.58236	1.44494	0.563965	0.584013	0.343715	0.31726	0.427733	0.244022	0.148	0.418	0.842063	0.495729	0.808664	0.168671	0.133506						1.96989	1.16907	0.511888	0.752816	0.760182	Ho	0.0540156
	Er	1.23188	0.768914	0.822987	3.57409	1.74468	0.578125	2.34541	0.474373	2.33444	2.22553	1.33496	1.70651	0.985802	2.20338	0.770825	0.750273	1.77803	2.19951	2.26306	1.00662	3.58785	1.74767	4.01264	1.6328	1.41531	0.839293	0.791211	0.975411	0.595853	0.33	1.18	2.31497	1.3109	2.2408	0.43282	0.329265						5.26772	3.676	1.31962	1.95566	2.21294	Er	0.12363
	Tm	0.200324	0.10823	0.117622	0.561723	0.262089	0.0846678	0.33342	0.0817897	0.345615	0.317848	0.209739	0.264519	0.142927	0.346291	0.111761	0.107114	0.263407	0.327608	0.369846	0.159649	0.526908	0.280854	0.607414	0.263867	0.195422	0.116483	0.113348	0.127965	0.081732	0.038	0.163	0.332507	0.184475	0.332107	0.060146	0.0481037						0.740068	0.609654	0.187257	0.278033	0.359665	Tm	0.0167296
	Yb	1.42621	0.73076	0.760848	3.71495	1.79439	0.569638	2.02068	0.599442	2.1474	2.05349	1.38943	1.7098	0.875991	2.39014	0.730897	0.687799	1.66696	2.07652	2.55679	1.1446	3.32568	1.96987	3.85199	1.81976	1.17401	0.701572	0.682444	0.700531	0.495666	0.2	1.09	2.17865	1.15455	2.14051	0.400001	0.323712						4.34236	4.36872	1.15752	1.69868	2.40869	Yb	0.0948414
	Lu	0.256266	0.116889	0.132672	0.606027	0.30484	0.106377	0.313153	0.118123	0.347902	0.328412	0.225362	0.270422	0.149076	0.404069	0.113589	0.106024	0.268048	0.346115	0.425852	0.206629	0.53618	0.331388	0.603711	0.301001	0.183346	0.107364	0.108508	0.0932512	0.0749771	0.028	0.173	0.348983	0.183664	0.3406	0.056313	0.0458595						0.645852	0.748238	0.187603	0.258694	0.397115	Lu	0.0151459
crystallization	age	102.1	98.6	76.9	72	62.7	61.8	58.5	58.1	53.4	53.3	51.5	51.6	50.3	58.9	83.5	86	64.8	72.1	58.8	61.3	72	59.5	60.9	66	48.1	50.4	39.81	29.64	37.2	39.9	40.9	47.9	51.5	46.3	31.66	30.1	21.5	25.1	68.5	42.1	41.5
2 sig	(95%conf.)	2.1	2.6	2.1	1.5	1.4	1.1	1.1	1.8	1.9	1.3	1.6	1.6	2.1	1.4	2.8	2.6	3.9	1.4	1.4	1.6	3	1.9	1.6	2.2	1.1	1.6	0.73	0.82	1.1	1.4	1.1	1.6	2.7	1.3	0.8	1.3	1.2	1.3	1.5	0.87	1
176/177Hf																																																	0.283003
εHf(i)	weighted mean	12.1	9.57	6.18	9.1	10	8.46	10.42	8.6	8.88	9.1	9.63	9.01	9.25	10.79	13.21	13.77	9.9	9.22	9.4	10.68	8.99	9.08	8.52	9.35	4.13						11.7	11.27	11.79	6.83					9.2	3.98	3.9							8.99969
2 sig	(95%conf.)	1.09	0.5	0.96	1.1	1.1	0.68	0.49	1.1	0.77	1	0.67		0.79	0.79	0.54	0.65	1.1	0.86	1	0.74	0.48	0.52	0.59	0.85	0.58						2	0.81	0.79	0.66						0.64	0.51
Sm	ppm	2.6	1.63	1.73	4.16	2.97	2.91	4.23	1.82	4.46	4.77	2.86		3.29	3.34	2.16	1.7	3.87	4.15	2.76	1.47	6.52	2.59	3.6	2.88	9.09	4.34	3.86	6.06	3.87	3.13	1.93	4.7	3.39	4.74	2.98	2.87	1.616	2.895	2.098
1sig	s.e	0.007	0.004	0.005	0.012	0.008	0.007	0.011	0.005	0.012	0.012	0.008		0.009	0.008	0.006	0.005	0.01	0.01	0.007	0.004	0.016	0.007	0.009	0.008	0.022	0.06	0.01	0.016	0.01	0.008	0.005	0.08	0.008	0.012	0.08	0.007	0.004	0.008	0.006
Nd	ppm	16.82	8.52	9.49	17.8	14.06	17.3	17.16	13.66	20.31	23.97	16.59	17.03	19.33	16.86	12.23	7.66	19.5	18.01	13.3	6.82	28.32	13.66	14.08	17.11	52.77	27.2	25.09	36.52	23.57	23.53	7.44	22.07	18.51	24.07	21.18	20.1	6.17	14.37	15.24			32.66	6.28
1sig	s.e	0.04	0.02	0.02	0.05	0.04	0.04	0.04	0.03	0.05	0.06	0.04		0.05	0.05	0.04	0.02	0.06	0.05	0.03	0.02	0.08	0.03	0.04	0.04	0.14	0.07	0.06	0.09	0.06	0.06	0.02	0.06	0.05	0.07	0.05	0.05	0.015	0.04	0.04
147Sm/144Nd		0.0936	0.1159	0.1102	0.1414	0.1278	0.1016	0.14909	0.08037	0.1329	0.1202	0.1041	0.1224	0.10283	0.1197	0.1068	0.134	0.12	0.1393	0.1252	0.1299	0.1392	0.11467	0.1546	0.1019	0.10419	0.0965	0.093	0.1003	0.0994	0.0805	0.1566	0.1289	0.1106	0.119	0.085	0.0863	0.1583	0.1218	0.0832
2sig	s.e	0.0004	0.0005	0.0005	0.0007	0.0006	0.0004	0.00063	0.00034	0.0006	0.0005	0.0005		0.00043	0.0005	0.0005	0.0006	0.0006	0.0006	0.0006	0.0006	0.0006	0.0005	0.0007	0.0004	0.00044	0.0004	0.0004	0.0004	0.0004	0.0003	0.0007	0.0005	0.0005	0.0006	0.0004	0.0004	0.0007	0.0005	0.0004
143Nd/144Nd		0.512825	0.512787	0.512656	0.51274	0.512757	0.512718	0.512751	0.512721	0.512727	0.512754	0.512678	0.512724	0.512686	0.512851	0.512848	0.512881	0.512853	0.512701	0.512789	0.512787	0.512772	0.512734	0.512753	0.512682	0.512281	0.512421	0.512301	0.512124	0.512702	0.512684	0.512919	0.512764	0.51279	0.512674	0.512487	0.51267	0.512276	0.512296	0.512722									0.512708
Nd initial		0.512763	0.512712	0.512601	0.512673	0.512705	0.512677	0.512694	0.51269	0.512681	0.512712	0.512643	0.512683	0.512652	0.512805	0.51279	0.512806	0.512802	0.512635	0.512741	0.512735	0.512706	0.512689	0.512691	0.512638	0.512248	0.512389	0.512277	0.512105	0.512678	0.512663	0.512877	0.512724	0.512753	0.512753	0.512638	0.512653	0.512254	0.512276	0.512685			0.512686	0.512687					0.512688
2sig	s.e	8e-06	8.20459e-06	5.12656e-06	7.17836e-06	8.20411e-06	8.20349e-06	4e-06	5e-06	5.12727e-06	7.17856e-06	1.02536e-05		3e-06	6e-06	6e-06	1e-05	4e-06	8e-06	8e-06	8e-06	6e-06	4e-06	5.12753e-06	7.17755e-06	4e-06	6.14905e-06	7.17221e-06	7.16974e-06	1e-05	6e-06	8e-06	8.20422e-06	1e-05	8e-06	8.19979e-06	6e-06	8e-06	8e-06	8e-06
ε Nd(i)		4.99113	3.92421	1.20018	2.49823	2.87302	2.31085	2.56005	2.48186	2.17112	2.78345	1.38895	2.2	1.53899	4.73438	5.05544	5.42946	4.82898	1.75736	3.48252	3.42957	3.14278	2.49583	2.57085	1.65697	-6.39699	-3.58909	-6.04771	-9.66371	1.71043	1.48903	5.6913	2.8726	3.5313	1.1138	-2.49539	1.04828	-6.95655	-6.43192	2.63112			2.19961	1.98342					1.73852
	1/nd*100	5.9453	11.7371	10.5374	5.61798	7.11238	5.78035	5.82751	7.32064	4.92368	4.17188	6.02773	5.87199	5.17331	5.9312	8.17661	13.0548	5.12821	5.55247	7.5188	14.6628	3.53107	7.32064	7.10227	5.84454	1.89502	3.67647	3.98565	2.73823	4.24268	4.24989	13.4409	4.53104	5.40249	4.15455	4.72144	4.97512	16.2075	6.95894	6.56168			3.06185	15.9236	#DIV/0!	#DIV/0!	#DIV/0!
	Client #	PK06-11	LB09-21.3A	KO8-3	LB09-22.7A	LB09-23.11A	LB09-5.2B	08-12	LB08-7	LB09-48	LB09-30	LB09-24.5A	LB09-16.7	08-25	PGUP-9	PGUP-16	PK05-39	PGLT-19	PGAK-26	Pba-15	Pba-04	PGUP-15	08-31	LB09-16.6A	LB09-33	08-23	KO8-13	LB09-11.4A	LB09-11.5	OA1-07	O1B22	O1B-24	PGAK13.1	PGAK-18.5	PK06-36	KO8-4	Pja-04						Pja-02	PGLT-57.1
	206/204	18.7203	18.5568	18.6229	18.6845	18.7477	18.5974	18.6179	18.5853	18.6106	18.711	18.8072	18.6924	18.7641	18.7105	18.619	18.4963	18.6796	18.7975	18.703	18.6568	18.7314	18.6834	18.7048	18.7232	18.9721	18.822	19.1545	18.9297	18.7964	18.6688	18.6154	18.7202	18.8259	18.902	18.8487	18.7462						18.7269	19.3399
Pb Isotopic Ratios (1)	207/204	15.6166	15.6648	15.7119	15.7486	15.7241	15.7086	15.6725	15.6606	15.6905	15.6629	15.692	15.7064	15.7351	15.6246	15.5715	15.6214	15.6824	15.7828	15.7211	15.6806	15.7202	15.6712	15.7312	15.6508	15.8436	15.788	15.8968	15.8387	15.714	15.6628	15.6765	15.6576	15.6901	15.7379	15.7807	15.7047						15.699	15.7813
	208/204	39.1044	38.9472	39.0235	39.2081	39.1405	39.1546	38.9278	39.0352	38.9877	39.0222	39.3031	39.1541	39.3527	38.9151	38.7646	38.6649	38.9887	39.5176	39.1746	38.9847	39.1869	39.0856	39.1305	39.0213	39.8306	39.5059	39.854	38.7363	39.289	39.0574	39.0029	38.9923	39.1895	39.4241	39.4254	39.0781						39.0916	39.3156
	207/206	0.834206	0.844154	0.843687	0.842868	0.838721	0.844663	0.8418	0.842634	0.843097	0.837095	0.834359	0.840257	0.838574	0.835074	0.836323	0.84457	0.839548	0.839623	0.840567	0.840479	0.839244	0.838777	0.841024	0.835905	0.835099	0.838801	0.829925	0.83671	0.836012	0.838982	0.842125	0.836403	0.83343	0.832606	0.837229	0.837756						0.838313	0.815998
	208/206	2.08888	2.09881	2.09546	2.09843	2.08775	2.10538	2.09088	2.10033	2.09492	2.08552	2.08978	2.09465	2.09724	2.07986	2.08199	2.09041	2.08724	2.10228	2.09457	2.08958	2.09204	2.09199	2.09201	2.08411	2.09943	2.09892	2.08065	2.04633	2.09024	2.09212	2.0952	2.0829	2.08168	2.08571	2.09168	2.08458						2.08746	2.03287
	206/204	0.0023	0.0023	0.0024	0.003	0.0028	0.0021	0.0028	0.0021	0.0019	0.0043	0.048	0.002	0.0019	0.0031	0.0024	0.0024	0.003	0.0022	0.0022	0.0026	0.0062	0.0032	0.0021	0.0052	0.0023	0.0028	0.0028	0.0025	0.0023	0.0062	0.0058	0.0025	0.0041	0.002	0.0069	0.0027						0.0029	0.003
Uncertainty, 1 sigma, % SE	207/204	0.0025	0.0022	0.0029	0.0036	0.0031	0.0022	0.0028	0.0021	0.002	0.0054	0.044	0.002	0.002	0.0038	0.0024	0.0024	0.0035	0.0023	0.0022	0.0028	0.0075	0.0035	0.0021	0.0056	0.0024	0.0028	0.0028	0.0026	0.0029	0.0065	0.0055	0.0031	0.0046	0.0019	0.0078	0.0028						0.0028	0.0038
	208/204	0.0026	0.0022	0.0043	0.0035	0.0031	0.0022	0.0031	0.0021	0.002	0.0057	0.048	0.0019	0.002	0.0038	0.0024	0.0027	0.004	0.0024	0.0022	0.003	0.0134	0.0034	0.0022	0.0066	0.0025	0.0028	0.003	0.0024	0.0039	0.0067	0.0063	0.0033	0.0049	0.002	0.0082	0.0028						0.0027	0.0045
	207/206	0.0012	0.0005	0.001	0.0009	0.0007	0.0005	0.0007	0.0006	0.0006	0.0014	0.004	0.0005	0.0005	0.001	0.0005	0.0007	0.001	0.0006	0.0006	0.0008	0.003	0.0008	0.0006	0.0013	0.0005	0.0006	0.0005	0.0006	0.0011	0.0011	0.0013	0.0008	0.0011	0.0004	0.0016	0.0005						0.0008	0.0011
	208/206	0.0011	0.0005	0.0017	0.001	0.0008	0.0005	0.0008	0.0006	0.0005	0.0019	0.0044	0.0005	0.0005	0.0012	0.0006	0.0007	0.0019	0.0006	0.0006	0.001	0.0059	0.0009	0.0006	0.0011	0.0006	0.0006	0.0005	0.0004	0.0021	0.0014	0.0018	0.0012	0.0018	0.0003	0.0022	0.0005						0.0006	0.002
206Pb/204Pb
207Pb/204Pb
208Pb/204Pb
206/204i		18.4458	18.4729	18.6059	18.6104	18.6334	18.5696	18.5728	18.5484	18.5775	18.5406	18.6825	18.5761	18.7138	18.4926	18.3247	18.3799	18.5753	18.6592	18.6763	18.5592	18.5965	18.5435	18.5461	18.5606	18.9175	18.777	19.1111	18.8921	18.7652	18.6634	18.5809	18.6551	18.7365	18.8406	18.8183	18.7047						18.7109	18.7592
207/204i		15.6034	15.6608	15.7111	15.745	15.7187	15.7072	15.6704	15.6589	15.689	15.6549	15.6861	15.7009	15.7327	15.6144	15.5574	15.6158	15.6775	15.7763	15.7176	15.676	15.716	15.6646	15.7237	15.6431	15.841	15.7858	15.8948	15.8369	15.7125	15.6626	15.6748	15.6546	15.6858	15.7351	15.7793	15.7028						15.6982	15.7541
208/204i		38.4961	38.8088	39.0063	39.0735	38.9795	38.9794	38.8617	38.8185	38.9484	38.7694	39.0268	38.9729	39.1842	38.6471	38.3231	38.5571	38.8766	39.3956	38.995	38.8932	38.9694	38.8312	39.0057	38.7672	39.6737	39.358	39.7845	38.6766	39.248	38.9547	38.9458	38.8965	39.0417	39.2568	39.3669	38.9902						39.0727	39.1536
208/206
Sample		PK06-11	LB09-21.3A	KO8-3	LB09-22.7	LB09-23.11A	LB09-5.2B	LB08-12	LB08-7	LB09-48	LB09-30	LB09-24.5	LB09-16.7	LB08-25	PGUP-9	PGUP-16	PK05-39	PGLT-19	PGAK-26	PGUP-15	Pba-4	Pba-15	LB08-31a	LB09-16.6A	LB09-33	LB08-23	KO8-13	LB09-11.4A	LB09-11.5A	O1A-7	01B-22	01b-24	PGAK-13.1	PGAK-18.5	PK06-36	KO8-4	PJA-4	LB11-O10	LB11-O16	LB11-S36
Rb (ppm)	ICPMS	31.6719	30.1602	21.1	112.596	52.8188	92.4239	42.72	103.298	35.2209	117.58	124.371	64.7	109.966	79.9934	53.0392	38.9904	81.8266	62.1997	133.523	12.9736	76.8411	94.2857	67.6872	110.189	124.044	85.8789	252.806	305.51	103	65.79	-	49.0364	66.312	174.375	139.392	67.612	-	-	-
	TIMS	-	-	-	-	-	-	42.7	128.3	-	-	-	-	125	-	-	-	-	-	-	-	-	105.5	-	-	156.8	-	-	-	-	-	5.3	-	-	-	-	-	291.3	125.8	67.67
Sr (ppm)	ICPMS	174.169	528.114	303.226	44.6631	245.716	58.8896	391.427	43.2572	451.023	408.412	244.902	316	268.457	201.812	484.95	513.839	442.586	441.776	72.838	456.204	356.474	163.545	305.609	206.935	1113.64	390.763	472.703	262.835	652	396.16	392.75	496.493	847.32	250.972	796.687	614.455	-	-	-
	TIMS	162	509	292	40.12	228	54.41	373.66	40.13	447.9	385.2	222.9	279.4	248.98	188.9	451.6	466.8	404.8	423.9	67.42	428.5	329.7	154.37	287.2	189.1	1306.1	373.9	452.6	236.1	652.3	380.8	396.1	457.2	929.4	233	759.2	546.4	162.4	294.1	17.42
87Sr/86Sr		0.704506	0.704102	0.704531	0.711811	0.704743	0.708706	0.704644	0.709976	0.704421	0.704863	0.705598	0.704696	0.705258	0.705064	0.704029	0.704079	0.704347	0.704924	0.70857	0.704276	0.704588	0.705452	0.704715	0.705732	0.710577	0.706317	0.709787	0.714583	0.704767	0.705289	0.704044	0.704445	0.70451	0.706374	0.706179	0.705095	0.711286	0.707863	0.714552
2sig s.e		7.04506e-06	1.83067e-05	8.45437e-06	1.28126e-05	8.45692e-06	8.50447e-06	8e-06	1.1e-05	1.26796e-05	1.40973e-05	9.87837e-06	8.45635e-06	1e-05	9.8709e-06	1.12645e-05	8.44895e-06	8.45216e-06	8.45909e-06	8.50284e-06	9.85986e-06	9.86423e-06	1e-05	8.45658e-06	8.46878e-06	1.3e-05	9.88844e-06	9.93702e-06	8.575e-06	8.4572e-06	8.46347e-06	8.44853e-06	7.04445e-06	9.86314e-06	8.47649e-06	7.06179e-06	9.87133e-06	7e-06	8e-06	1.3e-05
87Rb/86Srb		0.525962	0.165173	0.201265	7.29686	0.62175	4.54124	0.3305	9.2521	0.225865	0.832725	1.469	0.592371	1.4518	1.14652	0.316323	0.219464	0.534737	0.407244	5.30421	0.0822512	0.623476	1.9769	0.64062	1.54031	0.3474	0.635772	1.54766	3.36527	0.456932	0.480367	0.03868	0.285663	0.226358	2.00997	0.506142	0.31828	5.192	1.238	11.27
87Sr/86Sr initial		0.703744	0.703871	0.704311	0.704347	0.704189	0.704719	0.704382	0.704127	0.70425	0.704233	0.704523	0.704263	0.704221	0.704105	0.703654	0.703811	0.703855	0.704507	0.704139	0.704204	0.70395	0.703781	0.704161	0.704288	0.71034	0.705862	0.708912	0.71317	0.704526	0.705017	0.704022	0.704251	0.704344	0.705061	0.705952	0.704959	0.709701	0.707422	0.703582
87Sr/86Sr																																											0.704204	0.712567	0.704356	0.704134	0.706973		0.705168
87Sr/86Sri																																											0.704155	0.706082	0.704148	0.703941	0.704464		0.704908
		06-11	9-213A	Ko8-3	9-227A	92311A	9-52B	08-12	LB08-7	9-48	9-30	9-245	9-167A	08-25	PGUP-9	PGUP-16	05-39	PGLT-19	PGAK-26	PGUP-15	PBa-04	PBa-15	08-31	9-166A	9-33	08-23	Ko8-13	9-114A	9-115	O1A-07	O1B-22	O1B24	PGAK-13,1	PGAK-18,5	06-36	Ko8-4	PJa-04						Pja-2	PGLT 57.1	LB08-4	08-36	08-38
2	Cs	0.409873	0.421815	0.0738457	1.31961	1.24119	0.295334	2.53351	0.246524	0.57677	5.62929	1.29885	0.852195	1.40451	1.4778	0.735443	0.721696	0.906491	2.14268	2.2463	0.664038	2.82882	0.507895	0.67561	1.58901	1.97466	5.37811	15.4251	6.99523	1.76688	0.275	0.125	0.855376	1.54789	9.95635	4.05241	0.412722				0	0	0.278994	0.789902	0.231393	0.445688	1.41749
49	Rb	0.646366	0.615515	0.430613	2.29788	1.07794	1.8862	0.871838	2.10812	0.718793	2.39959	2.53818	1.32084	2.2442	1.63252	1.08243	0.795722	1.66993	1.26938	2.72495	0.264767	1.56819	1.9242	1.38137	2.24876	2.53151	1.75263	5.15932	6.23489	1.97187	1.34265	0.101837	1.00074	1.35331	3.55867	2.84474	1.37984				0	0	0.200966	1.3595	0.237614	0.841361	1.78407
456	Ba	0.482288	0.632176	0.824782	1.23131	0.585002	0.714287	0.522452	0.721769	0.777283	1.03216	1.283	1.13136	1.24186	0.802103	0.668432	0.774873	0.794865	0.634434	0.905744	0.243599	0.519956	1.02475	0.537421	1.18066	5.57976	0.534753	1.56294	1.37654	2.16291	2.33895	0.123355	0.513705	1.07519	1.37748	2.48211	3.55068				0	0	0.363236	0.00496923	0.196331	0.611225	1.22214
5.6	Th	1.16094	0.436296	0.0740653	1.9866	1.17378	2.77586	0.558756	2.26314	0.213131	2.3394	3.56001	1.23875	2.34321	1.98559	1.1354	0.439935	0.925244	0.888246	2.63536	0.312348	1.59589	1.91804	0.883291	2.7229	12.503	2.68112	5.22818	7.6131	2.50915	1.88929	0.255357	0.746045	1.44322	4.10689	7.13971	3.89734				0	0	0.139941	5.87363	0.4354	1.22114	1.83025		1.33573
1.3	U	0.73941	0.373746	0.103533	1.54621	1.17878	0.622494	0.539807	0.54531	0.254078	2.23136	2.27614	1.12524	0.990608	2.28446	1.06969	0.671316	1.21818	1.42429	1.07017	0.471572	1.17037	1.49261	1.58792	2.466	6.1628	1.15575	4.62333	6.7906	0.907121	0.140769	0.218462	0.71735	1.23497	2.13456	5.26452	2.61002				0	0	0.167546	29.819	0.364519	1.5382	1.5669		0.254655
8	Nb	0.376613	0.453044	0.392528	0.549973	0.520573	0.460265	0.347631	0.385201	0.597134	0.823073	0.662183	0.589589	0.767372	0.733512	0.454327	0.338871	2.43278	0.691874	1.16657	0.163286	1.10961	0.855422	1.71416	0.98839	2.05386	0.7284	1.49534	1.46096	1.34498	0.81	0.2725	0.594984	0.23641	0.981007	1.26364	0.35194				0	0	1.47738	6.27527	0.306836	1.98471	1.08269		0.461139
0.7	Ta	0.387546	0.314027	0.272625	0.680458	0.452965	0.2954	0.263281	0.2881	0.379327	0.618916	0.687177	0.510726	0.804907	0.85661	0.518918	0.297396	1.86683	0.710384	1.77388	0.155154	0.99462	0.864795	1.43614	1.31164	1.38737	0.6338	1.90557	2.19189	1.07845	0.218571	0.187143	0.45138	0.193313	1.0882	0.850137	0.283131				0	0	1.09423	9.85927	0.184869	1.65073	1.14865		0.286492
20	La	1.26114	0.502152	0.689399	0.994653	0.733596	1.29386	0.549585	1.17625	0.879255	1.2795	1.26505	0.983259	1.16176	1.04882	0.782472	0.377526	1.16328	0.704274	0.963083	0.427546	1.24526	0.915239	0.706624	1.44149	4.15271	1.95778	1.97893	2.58627	1.87609	2.1295	0.246	1.05369	1.61285	1.50638	1.80412	1.80114				0	0	0.867561	0.259979	0.609708	1.22154	1.02494		0.517237
43	Ce	0.9936	0.433576	0.561852	0.936182	0.664619	1.08115	0.609386	0.969589	0.888108	1.25278	1.08416	0.867078	1.09497	0.91089	0.681232	0.353253	0.999632	0.705224	0.84218	0.328026	1.25708	0.805769	0.736856	1.1578	3.35267	1.75101	1.67276	2.25725	1.56166	1.76953	0.267674	1.02855	1.18395	1.35844	1.48974	1.39585				0	0	1.04466	0.266908	0.57232	1.1507	1.02839		0.46723
11	Pb	0.326729	0.520081	0.556865	1.78744	0.768223	1.642	0.826998	1.01507	0.484324	0.826363	1.11814	0.59229	1.17918	0.729724	0.357984	0.583792	0.896059	0.888134	1.35767	0.350476	0.941083	0.752111	0.723525	1.18549	6.52849	1.54513	5.11703	6.31734	2.25328	1.22909	0.306364	0.624815	0.845806	1.72179	6.51342	2.23924				0	0	0.620358	2.53644	2.45921	0.510869	1.43517		2.34323
4.9	Pr	0.902995	0.435809	0.530738	0.964706	0.667952	0.969271	0.760363	0.853611	0.980591	1.32037	1.00012	0.866316	1.11188	0.906612	0.660979	0.387988	1.00245	0.828585	0.796063	0.334054	1.39866	0.763849	0.881684	1.03827	3.06964	1.65948	1.5326	2.12969	1.4858	1.46531	0.314286	1.10097	1.07862	1.31277	1.34169	1.23788				0	0	1.36581	0.313268	0.614806	1.21439	0.902236		0.439406
320	Sr	0.544279	1.65036	0.947581	0.139572	0.767864	0.18403	1.22321	0.135179	1.40945	1.27629	0.76532	0.987559	0.838927	0.630663	1.51547	1.60575	1.38308	1.38055	0.227619	1.42564	1.11398	0.511078	0.955028	0.646671	3.48013	1.22113	1.4772	0.82136	2.1274	1.238	1.22734	1.55154	2.64788	0.784287	2.48965	1.92017				0	0	1.74466	0.052796	0.467738	1.6443	0.268475		1.10619
20	Nd	0.772719	0.409473	0.477108	0.85982	0.598494	0.762686	0.834075	0.668752	0.978646	1.22831	0.815853	0.784906	0.94947	0.799711	0.579819	0.396172	0.928789	0.873004	0.65246	0.332602	1.39365	0.653835	0.905405	0.83984	2.59858	1.44106	1.25675	1.70683	1.24921	1.1545	0.3475	1.06123	0.962826	1.15185	1.06739	0.977181				0	0	1.56827	0.309937	0.629227	1.16117	0.787446		0.382061
3.9	Sm	0.661031	0.444092	0.463494	1.05005	0.650071	0.678822	1.07827	0.495904	1.10969	1.29095	0.745192	0.834111	0.853196	0.852451	0.545706	0.451758	1.00681	1.04006	0.733604	0.377904	1.63704	0.663291	1.23792	0.776843	2.26487	1.20592	0.998134	1.48803	1.04879	0.753846	0.451282	1.18989	0.893043	1.19047	0.789822	0.740648				0	0	2.2409	0.608243	0.767941	1.2416	0.839679		0.318425
132	Zr	1.28075	1.0062	0.960544	0.700469	1.14087	0.524164	0.957347	0.628371	1.21557	2.48513	1.04899	1.14045	1.36523	1.3239	0.78212	0.561873	1.65382	1.40873	0.640255	2.37589	1.81358	0.841711	1.49848	1.09613	1.90816	0.969972	1.04691	1.18196	1.11579	1.60606	0.227273	1.08027	1.2997	1.46551	0.916226	1.2056				0	0	0.782185	0.898514	0.445087	1.68276	1.03907		0.780303
3.7	Hf	1.22298	0.94501	0.859268	0.956446	1.10314	0.567655	1.02483	0.684318	1.11794	2.25618	1.0099	1.07109	1.34531	1.23387	0.696773	0.569675	1.27514	1.30057	0.812057	1.86988	1.58104	0.865421	1.40002	1.07282	1.7519	0.929084	1.0756	1.26221	1.05284	0	0	0.963948	1.0954	1.47049	0.933675	1.04154				0	0	0.810869	1.81925	0.425727	1.37212	1.05397		1.89189
1.1	Eu	1.13775	0.627156	0.705231	0.281508	0.728038	0.280171	0.97555	0.404128	1.08687	1.1707	0.636459	0.84765	0.659004	0.723745	0.637478	0.529134	1.12917	1.13087	0.400178	0.664258	1.52935	0.691895	1.13984	0.633282	1.90309	0.995746	0.742168	0.740039	0.973586	0.7	0.618182	1.22163	1.17723	0.783105	0.612021	0.689892				0	0	2.75034	0.205656	0.894692	1.26531	0.516101		0.406458
3.7	Gd	0.574411	0.408284	0.440411	1.15215	0.702851	0.540593	1.12778	0.319844	1.13054	1.21171	0.629216	0.785071	0.67628	0.823262	0.468423	0.431209	0.962773	1.0072	0.731122	0.406878	1.69223	0.654101	1.38932	0.690063	1.5689	0.836425	0.684316	1.00734	0.664675	0.459459	0.478378	1.11889	0.787772	1.09228	0.44454	0.40829				0	0	2.52165	0.847199	0.788576	1.17317	0.860852		0.207048
0.6	Tb	0.534683	0.391527	0.424066	1.38538	0.761237	0.454129	1.16044	0.242604	1.16693	1.15526	0.632162	0.814058	0.611556	0.883194	0.437854	0.421458	0.936639	1.0352	0.848155	0.409993	1.75299	0.705375	1.67147	0.681474	1.19055	0.682073	0.581006	0.884673	0.512562	0.335	0.508333	1.12003	0.718059	1.11796	0.338113	0.272273				0	0	2.61549	1.12234	0.742479	1.15089	0.924787		0.136284
3.6	Dy	0.53283	0.38877	0.41841	1.55083	0.791457	0.38573	1.17682	0.208355	1.16561	1.14105	0.627305	0.829414	0.549643	0.94944	0.420094	0.401803	0.937976	1.07775	0.9736	0.432144	1.79999	0.750468	1.86179	0.730278	0.9444	0.554974	0.496506	0.745262	0.414419	0.236111	0.525	1.13242	0.711205	1.10769	0.27336	0.21543				0	0	2.72737	1.38568	0.729167	1.08252	0.982864		0.0909905
19	Y	0.660466	0.380043	0.420328	1.8108	0.877227	0.339893	1.15459	0.234138	1.16038	1.13737	0.688917	0.882706	0.578688	1.0775	0.412683	0.44004	0.924423	1.1166	1.17675	0.468881	1.82512	0.887266	1.98526	0.827922	0.84612	0.481424	0.456724	0.601127	0.349255	0.186316	0.534211	1.15533	0.658448	1.16928	0.268884	0.182954				0	0	2.57747	1.82681	0.667922	1.0154	1.11417		0.157895
0.77	Ho	0.532561	0.363051	0.394718	1.56993	0.800876	0.315216	1.12199	0.20282	1.10882	1.0712	0.60859	0.796186	0.502995	0.948821	0.379988	0.368828	0.870163	1.04556	0.976724	0.437004	1.72837	0.756312	1.87655	0.732421	0.758458	0.446383	0.412026	0.555497	0.316912	0.192208	0.542857	1.09359	0.643803	1.05021	0.219053	0.173384				0	0	2.55829	1.51827	0.66479	0.977683	0.987249		0.0701501
2.1	Er	0.586607	0.36615	0.391898	1.70195	0.830798	0.275298	1.11686	0.225892	1.11164	1.05977	0.635694	0.812622	0.469429	1.04923	0.367059	0.357273	0.846683	1.04739	1.07765	0.479343	1.7085	0.832224	1.91078	0.777524	0.673955	0.399663	0.376767	0.464482	0.28374	0.157143	0.561905	1.10237	0.62424	1.06705	0.206105	0.156793				0	0	2.50844	1.75047	0.628388	0.931269	1.05378		0.0588715
0.28	Tm	0.715445	0.386534	0.420078	2.00615	0.936033	0.302385	1.19078	0.292106	1.23434	1.13517	0.749069	0.944709	0.510453	1.23675	0.399148	0.382551	0.940738	1.17003	1.32088	0.570174	1.88181	1.00305	2.16934	0.942383	0.697935	0.41601	0.404813	0.457017	0.2919	0.135714	0.582143	1.18753	0.658838	1.1861	0.214807	0.171799				0	0	2.6431	2.17733	0.668774	0.992977	1.28452		0.0597486
1.9	Yb	0.750638	0.384611	0.400446	1.95524	0.944414	0.299809	1.06351	0.315496	1.13021	1.08078	0.731281	0.899892	0.461048	1.25797	0.384683	0.361999	0.877347	1.0929	1.34568	0.602422	1.75036	1.03677	2.02736	0.957769	0.617901	0.369248	0.359181	0.368701	0.260877	0.105263	0.573684	1.14666	0.607656	1.12658	0.210527	0.170375				0	0	2.28545	2.29933	0.60922	0.894044	1.26773		0.0499165
0.3	Lu	0.854219	0.38963	0.442242	2.02009	1.01613	0.35459	1.04384	0.393742	1.15967	1.09471	0.751207	0.901406	0.49692	1.3469	0.378631	0.353415	0.893494	1.15372	1.41951	0.688764	1.78727	1.10463	2.01237	1.00334	0.611154	0.357881	0.361693	0.310837	0.249924	0.0933333	0.576667	1.16328	0.612215	1.13533	0.18771	0.152865				0	0	2.15284	2.49413	0.625343	0.862314	1.32372		0.0504863
Prim mantle		PK06-11	LB09-21.3A	K08-3	LB09-22.7A	LB09-23.11A	LB09-5.2B	LB08-12	LB08-7	LB09-48	LB09-30	LB09-24.5	LB09-16.7A	LB08-25	PGUP 9	PGUP 16	PK05-39	PGLT 19	PGAK 26	PGUP 15	PBA-04	PBA-15	LB08-31	LB09-16.6A	LB09-33	LB08-23	K08-13	LB09-11.4A	LB09-11.5				PGUP 9	PGAK 18.5	PK06-36	K08-4	PJA-04						PJA-2	PGLT 57.1	LB08-4	LB08-36	LB08-38
0.0079	Cs	103.765	106.789	18.6951	334.078	314.226	74.768	641.396	62.4112	146.018	1425.14	328.822	215.746	355.573	374.127	186.188	182.708	229.491	542.451	568.683	168.111	716.157	128.581	171.041	402.281	499.914	1361.55	3905.08	1770.94	447.312	69.6203	31.6456	216.551	391.871	2520.59	1025.93	104.487	0	0	0	0	0	70.6315	199.975	58.5806	112.832	358.858		162.484
0.635	Rb	49.8771	47.4964	33.2284	177.317	83.1793	145.549	67.2757	162.674	55.4659	185.166	195.859	101.923	173.175	125.974	83.5263	61.4022	128.861	97.9523	210.272	20.4309	121.01	148.481	106.594	173.526	195.345	135.242	398.12	481.118	152.16	103.606	7.85827	77.2227	104.428	274.606	219.515	106.476	0	0	0	0	0	15.5076	104.906	18.3356	64.9239	137.668		119.293
6.989	Ba	31.4671	41.2465	53.8132	80.3372	38.1687	46.6039	34.0876	47.0921	50.7141	67.3435	83.71	73.8159	81.0255	52.3335	43.6121	50.5569	51.8613	41.3939	59.0956	15.8937	33.9247	66.8602	35.0643	77.0326	364.054	34.8902	101.974	89.8127	141.12	152.606	8.04836	33.5169	70.1514	89.8739	161.946	231.665	0	0	0	0	0	23.6994	0.324219	12.8097	39.8796	79.7387		163.686
0.085	Th	76.4856	28.7442	4.87959	130.882	77.3316	182.88	36.8121	149.101	14.0416	154.125	234.542	81.6118	154.376	130.815	74.8029	28.984	60.9572	58.5197	173.624	20.5782	105.141	126.365	58.1933	179.391	823.73	176.638	344.445	501.569	165.309	124.471	16.8235	49.1512	95.0825	270.572	470.381	256.766	0	0	0	0	0	9.21962	386.968	28.6852	80.4517	120.581		88.0011
0.021	U	45.773	23.1367	6.40921	95.7178	72.9718	38.5353	33.4166	33.7573	15.7287	138.132	140.904	69.6577	61.3233	141.419	66.2188	41.5577	75.4111	88.1704	66.2485	29.1926	72.4515	92.3999	98.3001	152.657	381.507	71.5462	286.206	420.37	56.1551	8.71429	13.5238	44.4074	76.4503	132.139	325.899	161.572	0	0	0	0	0	10.3719	1845.94	22.5655	95.2221	96.9986		15.7644
0.713	Nb	4.22568	5.08324	4.40424	6.17081	5.84093	5.16426	3.90049	4.32204	6.69996	9.23504	7.42982	6.61531	8.61006	8.23014	5.09764	3.8022	27.2962	7.76296	13.0891	1.83211	12.45	9.598	19.2332	11.0899	23.0447	8.1728	16.778	16.3923	15.0909	9.08836	3.0575	6.67584	2.65256	11.0071	14.1783	3.94884	0	0	0	0	0	16.5765	70.4098	3.44277	22.2689	12.148		5.17407
0.041	Ta	6.61664	5.36143	4.65457	11.6176	7.73355	5.04341	4.49504	4.91878	6.47631	10.5669	11.7323	8.71971	13.7423	14.625	8.85958	5.07749	31.8727	12.1285	30.2857	2.64897	16.9813	14.7648	24.5195	22.3939	23.6868	10.821	32.5341	37.4225	18.4125	3.73171	3.19512	7.70649	3.30047	18.5791	14.5145	4.83395	0	0	0	0	0	18.682	168.329	3.1563	28.1832	19.6111		4.89132
0.687	La	36.7143	14.6187	20.0698	28.9564	21.3565	37.6669	15.9996	34.243	25.597	37.249	36.8283	28.6247	33.8213	30.5332	22.7794	10.9906	33.8655	20.5029	28.0374	12.4468	36.2522	26.6445	20.5713	41.9648	120.894	56.9951	57.6109	75.2917	54.617	61.9942	7.16157	30.6752	46.9535	43.8538	52.5217	52.435	0	0	0	0	0	25.2565	7.56852	17.7499	35.5615	29.8381		15.0578
1.775	Ce	24.0703	10.5035	13.6111	22.6793	16.1006	26.1912	14.7626	23.4886	21.5147	30.3489	26.2642	21.0053	26.5259	22.0666	16.5031	8.55767	24.2164	17.0843	20.4021	7.94655	30.4532	19.52	17.8506	28.048	81.2197	42.4188	40.5233	54.6827	37.8317	42.8676	6.48451	24.917	28.6817	32.9087	36.0895	33.815	0	0	0	0	0	25.3072	6.46593	13.8647	27.8762	24.9132		11.3188
0.071	Pb	50.62	80.5759	86.2748	276.927	119.021	254.394	128.126	157.265	75.0361	128.028	173.233	91.7632	182.691	113.056	55.4623	90.4467	138.826	137.598	210.344	54.2992	145.802	116.524	112.095	183.668	1011.46	239.386	792.779	978.743	349.1	190.423	47.4648	96.8023	131.04	266.756	1009.12	346.924	0	0	0	0	0	96.1118	392.97	381.004	79.1487	222.35		363.036
0.276	Pr	16.0314	7.73719	9.42253	17.127	11.8586	17.2081	13.4992	15.1547	17.409	23.4414	17.7557	15.3802	19.7398	16.0956	11.7348	6.8882	17.7972	14.7104	14.133	5.93066	24.8313	13.5611	15.6531	18.4331	54.4972	29.4618	27.2092	37.8096	26.3784	26.0145	5.57971	19.5462	19.1495	23.3065	23.8199	21.9769	0	0	0	0	0	24.2481	5.56165	10.915	21.5598	16.018		7.80104
21.1	Sr	8.25446	25.0291	14.3709	2.11673	11.6453	2.79098	18.551	2.0501	21.3755	19.356	11.6067	14.9772	12.7231	9.56455	22.9834	24.3526	20.9756	20.9372	3.45204	21.6211	16.8945	7.75094	14.4838	9.80734	52.7793	18.5196	22.403	12.4566	32.2639	18.7754	18.6137	23.5305	40.1574	11.8944	37.7577	29.1211	0	0	0	0	0	26.4592	0.800697	7.09365	24.9372	4.07166		16.7763
1.354	Nd	11.4139	6.04835	7.04739	12.7004	8.84038	11.2657	12.3202	9.87816	14.4556	18.1435	12.051	11.5939	14.0247	11.8126	8.56454	5.85187	13.7192	12.8952	9.63752	4.91288	20.5857	9.65783	13.3738	12.4053	38.3838	21.286	18.5635	25.2117	18.4521	17.0532	5.13294	15.6754	14.222	17.014	15.7665	14.434	0	0	0	0	0	23.165	4.5781	9.29434	17.1517	11.6314		5.64344
0.444	Sm	5.80635	3.90081	4.07123	9.22343	5.71008	5.96262	9.4713	4.35591	9.74724	11.3394	6.5456	7.32665	7.49429	7.48775	4.79337	3.96815	8.84364	9.13568	6.44382	3.31943	14.3794	5.82621	10.8737	6.82362	19.8941	10.5926	8.76739	13.0706	9.21234	6.62162	3.96396	10.4518	7.8443	10.4568	6.93763	6.50569	0	0	0	0	0	19.6836	5.34267	6.74542	10.906	7.37556		2.79698
11.2	Zr	15.0945	11.8587	11.3207	8.25553	13.4459	6.17765	11.283	7.40581	14.3263	29.289	12.363	13.441	16.0903	15.6032	9.21784	6.62207	19.4914	16.6028	7.54586	28.0015	21.3744	9.92016	17.6606	12.9186	22.489	11.4318	12.3386	13.9303	13.1504	18.9286	2.67857	12.7318	15.3179	17.272	10.7984	14.2088	0	0	0	0	0	9.2186	10.5896	5.24567	19.8325	12.2462		9.19643
0.309	Hf	14.6441	11.3156	10.289	11.4526	13.2092	6.79716	12.2715	8.19409	13.3863	27.0157	12.0927	12.8253	16.1089	14.7745	8.34323	6.82136	15.2686	15.5732	9.72366	22.3901	18.9315	10.3626	16.764	12.846	20.9775	11.125	12.8794	15.1138	12.6068	0	0	11.5424	13.1164	17.6078	11.1799	12.4715	0	0	0	0	0	9.70944	21.7839	5.0977	16.4299	12.6203		22.6537
0.168	Eu	7.44954	4.10638	4.61758	1.84321	4.76691	1.83445	6.38753	2.64608	7.11643	7.66532	4.16729	5.55009	4.31491	4.73881	4.17396	3.46457	7.3934	7.40453	2.62021	4.34931	10.0136	4.53027	7.46324	4.14649	12.4607	6.51977	4.85944	4.84549	6.37467	4.58333	4.04762	7.99875	7.70803	5.12747	4.00728	4.51715	0	0	0	0	0	18.0082	1.34656	5.8581	8.28474	3.37923		2.66133
0.596	Gd	3.56597	2.53465	2.7341	7.15262	4.36333	3.35603	7.00133	1.98561	7.01848	7.52235	3.9062	4.87376	4.19838	5.11085	2.908	2.67697	5.97695	6.25276	4.53884	2.52592	10.5055	4.06069	8.62499	4.28395	9.73979	5.19257	4.24827	6.25359	4.12634	2.85235	2.9698	6.94612	4.89053	6.78093	2.75973	2.53469	0	0	0	0	0	15.6545	5.25946	4.89553	7.28312	5.34421		1.28537
0.108	Tb	2.97046	2.17515	2.35592	7.69653	4.2291	2.52294	6.44691	1.3478	6.48297	6.41812	3.51201	4.52254	3.39754	4.90664	2.43252	2.34143	5.20355	5.75112	4.71197	2.27774	9.73882	3.91875	9.28596	3.78597	6.61419	3.7893	3.22781	4.91485	2.84757	1.86111	2.82407	6.2224	3.98922	6.21089	1.87841	1.51263	0	0	0	0	0	14.5305	6.23522	4.12489	6.39383	5.1377		0.757131
0.737	Dy	2.6027	1.89901	2.04379	7.57527	3.866	1.88416	5.74838	1.01775	5.69364	5.57367	3.06418	4.05141	2.68482	4.6377	2.05202	1.96267	4.5817	5.26447	4.75571	2.11088	8.79234	3.66579	9.09422	3.56716	4.61308	2.71086	2.42527	3.64036	2.0243	1.15332	2.56445	5.53152	3.474	5.41068	1.33527	1.0523	0	0	0	0	0	13.3223	6.7686	3.56174	5.28774	4.80096		0.444458
4.55	Y	2.75799	1.58699	1.75522	7.56157	3.66315	1.41933	4.82136	0.97772	4.84555	4.74945	2.8768	3.68602	2.4165	4.49946	1.72329	1.83753	3.86023	4.66272	4.91389	1.95796	7.6214	3.70507	8.29009	3.45726	3.53325	2.01034	1.9072	2.5102	1.45843	0.778022	2.23077	4.82446	2.74956	4.88271	1.12281	0.763986	0	0	0	0	0	10.763	7.62845	2.78912	4.24013	4.65258		0.659341
0.164	Ho	2.50044	1.70457	1.85325	7.37102	3.76021	1.47998	5.26789	0.952264	5.20603	5.02943	2.8574	3.73819	2.36162	4.45483	1.78409	1.73169	4.08552	4.90905	4.58584	2.05179	8.11491	3.55097	8.81061	3.43881	3.56105	2.09582	1.93451	2.60813	1.48794	0.902439	2.54878	5.13453	3.02274	4.93088	1.02848	0.81406	0	0	0	0	0	12.0115	7.12848	3.12127	4.59034	4.63525		0.329363
0.48	Er	2.56641	1.6019	1.71456	7.44603	3.63474	1.20443	4.88628	0.988277	4.86342	4.63651	2.78116	3.55522	2.05375	4.59038	1.60589	1.56307	3.70424	4.58231	4.71471	2.09713	7.47469	3.64098	8.35967	3.40167	2.94855	1.74853	1.64836	2.03211	1.24136	0.6875	2.45833	4.82285	2.73105	4.66834	0.901708	0.685968	0	0	0	0	0	10.9744	7.65833	2.7492	4.0743	4.61029		0.257563
0.074	Tm	2.70709	1.46256	1.58949	7.59086	3.54174	1.14416	4.50567	1.10527	4.67048	4.29525	2.83431	3.57457	1.93144	4.6796	1.51029	1.44749	3.55955	4.42714	4.99792	2.15741	7.12038	3.79533	8.2083	3.56577	2.64084	1.57409	1.53173	1.72925	1.10449	0.513514	2.2027	4.49334	2.4929	4.48793	0.812784	0.65005	0	0	0	0	0	10.0009	8.23856	2.5305	3.75721	4.86034		0.226076
0.493	Yb	2.89293	1.48227	1.5433	7.53539	3.63973	1.15545	4.09874	1.21591	4.35577	4.16529	2.81832	3.46814	1.77686	4.84816	1.48255	1.39513	3.38125	4.212	5.1862	2.32171	6.74581	3.99567	7.81337	3.6912	2.38136	1.42307	1.38427	1.42096	1.00541	0.40568	2.21095	4.41917	2.34188	4.34181	0.811361	0.656617	0	0	0	0	0	8.80804	8.8615	2.34791	3.44561	4.88579		0.192376
0.074	Lu	3.46305	1.57958	1.79287	8.18956	4.11946	1.43753	4.23179	1.59625	4.70138	4.438	3.04543	3.65435	2.01454	5.46039	1.53499	1.43276	3.62227	4.67724	5.75475	2.79229	7.24568	4.47821	8.15826	4.06758	2.47765	1.45087	1.46632	1.26015	1.0132	0.378378	2.33784	4.71598	2.48195	4.60271	0.760986	0.619724	0	0	0	0	0	8.72773	10.1113	2.53517	3.49587	5.36641		0.204674
	Gd/Yb	1.23265	1.70997	1.77159	0.949204	1.19881	2.90452	1.70817	1.63303	1.61131	1.80596	1.386	1.40529	2.36281	1.05418	1.96148	1.9188	1.76767	1.48451	0.875178	1.08796	1.55733	1.01627	1.10388	1.16058	4.09001	3.64886	3.06897	4.40098	4.10415	7.03104	1.34322	1.57182	2.08829	1.56178	3.40136	3.86022	#DIV/0!	#DIV/0!	#DIV/0!	#DIV/0!	#DIV/0!	1.7773	0.593518	2.08506	2.11374	1.09383	#DIV/0!	6.68153
	Sr/Y	13.8793	73.1377	37.9685	1.29815	14.7424	9.11891	17.8431	9.72372	20.4571	18.8992	18.7099	18.8427	24.4161	9.8577	61.8481	61.4584	25.1984	20.8234	3.25778	51.2087	10.2797	9.70129	8.10205	13.155	69.2724	42.72	54.473	23.0125	102.59	111.91	38.6946	22.618	67.7287	11.2967	155.944	176.764	#DIV/0!	#DIV/0!	#DIV/0!	#DIV/0!	#DIV/0!	11.4002	0.486747	11.7943	27.2735	4.05834	#VALUE!	117.993
	Th/Yb	26.4388	19.392	3.16179	17.369	21.2465	158.276	8.98133	122.626	3.22367	37.0023	83.2203	23.5318	86.8816	26.9824	50.4555	20.7751	18.028	13.8936	33.478	8.86338	15.5861	31.6255	7.44791	48.5997	345.907	124.125	248.828	352.98	164.42	306.82	7.60917	11.1223	40.6009	62.3178	579.744	391.044	#DIV/0!	#DIV/0!	#DIV/0!	#DIV/0!	#DIV/0!	1.04673	43.6685	12.2174	23.3491	24.68	#DIV/0!	457.443
	Ba/La	0.857079	2.8215	2.6813	2.77442	1.78721	1.23727	2.13053	1.37523	1.98126	1.80793	2.27298	2.57875	2.3957	1.71399	1.91454	4.60002	1.53139	2.01893	2.10775	1.27694	0.935798	2.50934	1.70452	1.83565	3.01135	0.612161	1.77005	1.19286	2.58381	2.46161	1.12383	1.09264	1.49406	2.0494	3.08342	4.41815	#DIV/0!	#DIV/0!	#DIV/0!	#DIV/0!	#DIV/0!	0.93835	0.0428378	0.721679	1.12143	2.67238	#DIV/0!	10.8705
[truncated: 93 more columns]

## Sheet: New Pb-isotope WR Data
Table 2 New Pb isotopic analyses of whole rocks
sample			Pb [ppm]			206/204	2SE	207/204	2SE	208/204	2SE
No.
KARAKORUM
01B-16						19.768	0.001	15.765	0.001	38.894	0.0235
01A-50b			6.86			18.5631	0.0082	15.4835	0.0084	38.2876	0.002
sh25-00			12			18.715	0.008	15.651	0.013	38.847	0.058
KOHISTAN BATHOLITH
SU-01-10			12.8195			18.842	0.0044	15.6048	0.0054	38.993	0.0176
SU-01-11			13.1335			18.729	0.004	15.611	0.0053	38.8794	0.0012
SU-01-13			2.68844			18.309	0.004	15.536	0.005	38.331	0.018
01B-25			2.97			19.226	0.02	15.715	0.039	39.579	0.073
01B-24			3.37			18.565	0.004	15.61	0.005	38.889	0.017
01B-22			13.52			18.654	0.01	15.657	0.016	39.027	0.034
01A-07			24			18.761	0.005	15.698	0.006	39.214	0.023
Chilas
C 03 45 rep			0.0316908			18.1781	0.0128719	15.5478	0.0125349	38.17	0.0292438
C03_45			0.0241237			18.437	0.015316	15.6514	0.0155885	38.598	0.0346064
C 174			0.0253461			18.1252	0.0229265	15.6487	0.0238695	38.1234	0.0528507
C 123			0.00114504			18.8175	0.052897	15.6827	0.0661368	38.6547	0.133921
C 218			0.0634092			18.3269	0.0138355	15.6141	0.0124924	38.3007	0.0313279
C219			0.0481762			18.5659	0.0173164	15.6354	0.0153241	38.5949	0.0374882
C134			2.82886			18.4612	0.00212	15.6114	2.02e-05	38.6142	0.00452266
C 48			0.898443			18.4451	0.00422	15.6237	2.16e-05	38.5905	0.00888452
C138			3.5336			18.4739	0.001172	15.6127	1.37e-05	38.611	0.00255432
C132			1.71316			18.4997	0.00292	15.616	2.22e-05	38.6526	0.00615744
C7 GNR			0.886665			18.4466	0.00318	15.6217	2.36e-05	38.5987	0.00671458
C135			2.38785			18.4678	0.00366	15.6211	3e-05	38.6385	0.00831154
C136			1.90639			18.4523	0.0033	15.6115	0.0001312	38.6073	0.00700725
C220			5.11791			18.5963	0.00244	15.6554	1.898e-05	38.836	0.00528305
JIJAL
J 21			0.117818			18.2055	0.00676198	15.5811	0.00604524	38.0762	0.015841
J 34			0.111472			18.6951	0.00687776	15.6484	0.00621663	38.6346	0.016042
J 23			0.0487891			17.3717	0.0286141	15.447	0.0256794	37.0404	0.063928
J 3			0.155837			18.134	0.0110033	15.5124	0.00968839	38.0705	0.025504
J 40			1.15872			18.5592	0.00653039	15.5887	0.00571057	38.7221	0.0154109

## Sheet: New Nd, Sr Wr data
Table 2a Sr, Nd isotopic analyses
sample	age		ppm Rb	ppm Sr	87Rb/86Sr	87Sr/86Sr		87Sr/86Sr	ppm Sm	ppm Nd	147Sm/144Nd	143Nd/144Nd		143Nd/144Nd	eNd(0)	eNd (T)	T DM (Nd)	lambda Sm	lambda Rb
No.						sample (0)		sample (T)				sample (0)		sample (T)			(Ga)
KOHISTAN BATHOLITH
SU-01-8	30		75.8	354	0.603857	0.705088	8	0.705062	1.24	7.64	0.101864	0.512708	19	0.512688	1.32647	1.729	0.603663	6.54e-06	1.42e-06
SU-01-9	50		64.8	613	0.298114	0.70483	8	0.704809	2.41	18.9	0.0800292	0.512712	10	0.512686	1.40449	2.18876	0.50058	6.54e-06	1.42e-06
SU-01-10	50		86.2	653	0.372273	0.704804	9	0.704778	4.91	24.73	0.124609	0.512756	5	0.512715	2.2628	2.76273	0.675483	6.54e-06	1.42e-06
SU-01-11	70		76.8	925	0.234146	0.70418	18	0.704157	3.34	21.46	0.097681	0.512729	3	0.512684	1.73611	2.66096	0.554322	6.54e-06	1.42e-06
SU-01-13	153		36.4	507	0.20247	0.703509	8	0.703465	2.9	13.8	0.13189	0.512841	4	0.512709	3.92088	5.22953	0.577147	6.54e-06	1.42e-06
01B-25	112		43.75	414.79	0.297452	0.704155	9	0.704108	3.2	16.57	0.121205	0.512832	6	0.512743	3.74532	4.86625	0.525358	6.54e-06	1.42e-06
01B-24	44		4.99	392.75	0.0358304	0.704024	8	0.704022	1.76	6.95	0.158936	0.512837	6	0.512791	3.84285	4.09491	0.873015	6.54e-06	1.42e-06
01B-22	47		65.79	396.16	0.468336	0.704205	45	0.704174	2.94	23.09	0.0799129	0.512706	12	0.512681	1.28745	2.02768	0.506985	6.54e-06	1.42e-06
01A-07	38		103	652	0.44551	0.704453	20	0.704429	XRF	XRF	0.1	0.512686	32	0.512661	0.897316	1.4058	0.62327	6.54e-06	1.42e-06
																			1.42e-06
JIJAL
90/02/01	99		0.85	353	0.00679066	0.703821	9	0.70382	3.72	12.9	0.180987	0.512876	6	0.512759	4.60362	4.84364	1.27926	6.54e-06	1.42e-06
91/07/01	95		2.7	428	0.0177905	0.703605	13	0.703603	2.95	13.31	0.139103	0.513265	25	0.513179	12.1918	12.9334	-0.236221	6.54e-06	1.42e-06
91/08/01	93		50.78	195	0.734389	0.704886	10	0.704789	1.23	5.83	0.132413	0.512883	18	0.512802	4.74017	5.54465	0.502034	6.54e-06	1.42e-06
KARAKORUM
01B-16	130		21.59	589.48	0.103288	0.704914	9	0.704895	2.56	13.16	0.122089	0.512613	8	0.512509	-0.526685	0.752162	0.89465	6.54e-06	1.42e-06
01A-50b	107		117.7	853.4	0.388948	0.706601	9	0.706542	1.65	9.7	0.106759	0.512721	13	0.512646	1.58006	2.84938	0.612734	6.54e-06	1.42e-06
01B-04	104		91.4	353.8	0.728545	0.706372	14	0.706264	3.15	21.46	0.0921243	0.512688	16	0.512625	0.93633	2.36526	0.580431	6.54e-06	1.42e-06
sh25-00	107		60	537	0.315097	0.704877	9	0.704829	XRF	XRF	0.1	0.512659	7	0.512589	0.37063	1.73195	0.65946	6.54e-06	1.42e-06

## Sheet: New Hf Zircon data
Table 2c
Sample nr.	176Hf/177Hf	± 2s	176Hf/177Hf	eps Hf	eps Hf	±2s	T2 (DM)	206/238
	measured		(T)	(0)	(T)		(Ga)	Zircon age
Leucogranite
SU-01-8/3	0.282958	5e-06	0.282969	7.08841	7.81808	0.176834	0.570832	30.21
SU-01-8/4	0.283059	3.8e-06	0.283031	9.26268	9.99251	0.134394	0.4424	30.42
SU-01-8/5	0.282977	4e-06	0.282988	7.74621	8.47593	0.141467	0.53201	30.68
SU-01-8/6	0.282359	1.2e-05	0.282334	-14.1099	-4.96809	0.424759	1.63946	161.7
SU-01-8/7	0.282843	9e-06	0.282854	3.00718	3.73655	0.318301	0.811044	37
SU-01-8/8	0.283038	3.1e-06	0.28301	8.52009	9.24987	0.109637	0.4863	30.12
SU-01-8/9	0.283044	2.2e-06	0.283016	8.73226	9.46205	0.0778069	0.473761	30.08
Matum Das
SU-01-12/1	0.283243	2.5e-05	0.283203	15.7691	19.1973	0.884407	--	153.5
SU-01-12/2	0.283339	1e-05	0.283299	19.1638	22.5931	0.353763	--	154
SU-01-12/3	0.283319	9.8e-06	0.283279	18.4424	21.8715	0.346688	--	154.3
SU-01-12/4	0.283297	9.6e-06	0.283257	17.6786	21.1074	0.339612	--	150.4
Hbl Peg
SU-01-6/1	0.283078	4e-06	0.283064	10.6086	12.4344	0.141483	0.339513	70.4
SU-01-6/2	0.283044	6e-06	0.28303	9.40621	11.2319	0.212224	0.410782	67.57
SU-01-6/5	0.283061	2e-06	0.283037	9.65265	11.4783	0.5	0.396183	69.68
SU-01-6/6	0.28307	2e-06	0.283046	9.97091	11.7967	0.5	0.377322	68.74
SU-01-6/7	0.283051	2e-06	0.283027	9.29902	11.1247	0.5	0.417131	67.74
Dirite
SU-01-10/1	0.283025	2e-06	0.283012	8.73431	10.3315	0.0707396	0.455387	74.3
SU-01-10/2	0.283033	3e-06	0.28302	9.01721	10.6144	0.106109	0.438644	74.96
SU-01-10/4	0.283039	4.4e-06	0.283021	9.05203	10.6492	0.7	0.436583	74.69
Tonalite
C75/1	0.282848	6e-06	0.282907	4.81515	6.6125	0.5	0.667446	79
C75/4	0.28293	2e-06	0.282989	7.71563	9.51351	0.5	0.496209	79.6
C75/6	0.282922	2e-06	0.282994	7.89385	9.69176	0.5	0.485669	80.4
C75/7	0.282863	2e-06	0.282922	5.34573	7.14317	0.5	0.636165	79.41
Diorte Chilas
C220/1	0.282771	7e-06	0.282821	1.77244	3.45683	0.5	0.849733	74.3
C220/2	0.282789	7e-06	0.282839	2.40911	4.09361	0.5	0.812331	74.96
C220/3	0.282789	7e-06	0.282839	2.40911	4.09361	0.5	0.812331	74.69
C220/4	0.282774	7e-06	0.282824	1.87855	3.56296	0.5	0.843501

## Sheet: All Zircon Hf data KLA
Summary of all available TIMS U-Pb isotopes on zircon and Hf isotopic data of samples from the KLA.
2
3	Number		Description	Weight	nr.		Concentrations							Atomic ratios						Apparent ages		Error
4
5					grains		rad.	nonrad.					2s [%]		2s [%]		2s [%]					r	measured		(T)	(0)		eHf(T)
6							[ppm]	[pg]	b)		c)	d) e)		d)		d) e)							f)			g)	206/238 age		err
7	This Study
8	Matum Das (SU-01-12)
9	1		G-P-type lpr	0.0027	3	81.44	2.04	3.6	0.63		111	0.02409	0.72	0.16083	4.69	0.04842	4.43		153.5	151.44	119.9	0.43	0.283243	2.5e-05	0.283203	15.7691	153.5	19.1973	0.884407
10	2		lpr	0.0026	3	143	3.55	0.69	0.44		838	0.02417	0.74	0.16507	1.69	0.04953	1.62		154	155.1	172.9	0.31	0.283339	1e-05	0.283299	19.1638	154	22.5931	0.353763
11	3		lpr	0.0023	2	157	3.81	3.94	0.36		158	0.02422	0.59	0.16421	3.16	0.04917	2.93		154.3	154.4	155.9	0.47	0.283319	9.8e-06	0.283279	18.4424	154.3	21.8715	0.346688
12	4		lpr	0.0026	1	134	3.12	2.21	0.38		254	0.0236	0.63	0.15737	2.9	0.044836	2.7		150.4	148.4	116.9	0.42	0.283297	9.6e-06	0.283257	17.6786	150.4	21.1074	0.339612
13
14	Hornblende pegmatite, Chilas (SU-01-6)
15	5		eq subround	0.0881	1	28.22	0.29	1.95	0.24		868	0.01054	0.41	0.06887	0.99	0.04739	0.87		67.69	67.63	65.32	0.48	0.283078	4e-06	0.283064	10.6086	67.69	12.4344	0.141483
16	6		eq spr	0.0041	4	23.69	0.26	0.68	0.36		1080	0.01098	0.36	0.07193	1.77	0.04751	1.6		70.4	70.55	74.98	0.55	0.283044	6e-06	0.28303	9.40621	70.4	11.2319	0.212224
17	7		ovoid clrls	0.0493	5	45.4	0.47	0.62	0.3		2410	0.01054	0.62	0.06955	0.69	0.04787	0.59		67.57	68.28	92.93	0.6					67.57
18	8		round clrls	0.0691	1	15.54	0.17	1.94	0.35		398	0.01087	0.45	0.07107	2.03	0.04743	1.87		69.68	69.71	70.91	0.45	0.283061	2e-06	0.283037	9.65265	69.68	11.4783	0.5
19	9		spr clrls	0.0852	1	12.78	0.13	9.4	0.15		96	0.01072	0.56	0.07151	4.33	0.04837	4.24		68.74	70.13	117.65	0.22	0.28307	2e-06	0.283046	9.97091	68.74	11.7967	0.5
20	10		prism clrls	0.1027	1	54.1	0.56	2.05	0.27		1831	0.01056	0.36	0.06933	0.54	0.0476	0.38		67.74	68.07	79.56	0.71	0.283051	2e-06	0.283027	9.29902	67.74	11.1247	0.5
21
22	Tonalite , Chilas (C75)
23	11		lge prism	0.0145	1	45.83	0.6	8.37	0.51		81	0.01233	0.72	0.08183	5.76	0.04814	5.69		79	79.86	105.94	0.16	0.282848	6e-06	0.282907	4.81515	79	6.6125	0.5
24	12		prism	0.0241	3	249	3.18	25.25	0.42		205	0.01242	1.25	0.08235	2.3	0.04808	2.24		79.6	80.4	103.03	0.32	0.28293	2e-06	0.282989	7.71563	79.6	9.51351	0.5
25	13		prism lge	0.0239	1	247	3.09	4.53	0.17		1056	0.01255	0.4	0.08474	0.56	0.04897	0.4		80.4	82.59	146.34	0.7	0.282922	2e-06	0.282994	7.89385	80.4	9.69176	0.5
26	14		spr tips	0.0334	5	245	3.04	6.94	0.34		943	0.01239	0.63	0.08177	0.78	0.04785	0.66		79.41	79.81	91.89	0.58					79.41
27	15		eq-round, brown	0.0383	1	204	2.46	1.02	0.23		6048	0.01245	0.35	0.08188	0.4	0.04768	0.2		79.79	79.91	83.45	0.87	0.282863	2e-06	0.282922	5.34573	79.79	7.14317	0.5
28
29	Diorite , Chilas (C220)
30	16		prism euh	0.0156	2	70	0.96	7.6	0.96		123	0.01159	0.57	0.07629	3.27	0.04773	3.2		74.3	74.65	85.83	0.21	0.282771	7e-06	0.282821	1.77244	74.3	3.45683	0.5
31	17		prism euh	0.0137	4	77	1.08	2.5	0.98		332	0.0117	0.65	0.07736	2.6	0.04797	2.4		74.96	75.66	97.95	0.42	0.282789	7e-06	0.282839	2.40911	74.96	4.09361	0.5
32	18		round-subh	0.0078	4	86	1.15	1.19	2.46		434	0.01165	0.71	0.07483	3.21	0.04657	3		74.69	73.27	27.35	0.4	0.282789	7e-06	0.282839	2.40911	74.69	4.09361	0.5
33
34	Diorite , Indus confluence (SU-01-10)
35	19		eq pink	0.027	2	230	2.12	6.95	0.92		462	0.00784	0.41	0.05107	1.1	0.04722	1		50.37	50.58	60.33	0.42	0.283025	2e-06	0.283012	8.73431	50.37	10.3315	0.0707396
36	20		spr euh	0.0306	3	220	2	3.61	0.89		945	0.00785	0.46	0.05098	0.75	0.04709	0.65		50.43	50.49	53.61	0.51	0.283033	3e-06	0.28302	9.01721	50.43	10.6144	0.106109
37	21		eq	0.0187	3	203	1.84	2.4	0.89		810	0.00788	0.47	0.05106	1	0.04699	0.96		50.6	50.56	48.85	0.32	0.283039	4.4e-06	0.283021	9.05203	50.6	10.6492	0.7
38	Leucogranite, Indus confluence (SU-01-8)
39	22		G-type tablets	0.0123	8	4317	19.5	37.7	0.19		6935	0.00478	0.37	0.0307	0.96	0.04661	0.85		30.21	30.34	41.3	0.47	0.282958	5e-06	0.282969	7.08841	30.21	7.81808	0.176834
40	23		G-type acic	0.0071	7	4227	19.26	8.4	0.11		1087	0.0048	0.37	0.03087	0.54	0.04661	0.38		30.42	30.73	55.33	0.71	0.283059	3.8e-06	0.283031	9.26268	30.42	9.99251	0.134394
41	24		prism tips	0.0219	4	3956	17.97	7.46	0.17		3520	0.00477	0.36	0.03076	0.42	0.04677	0.18		30.68	30.76	37.28	0.9	0.282977	4e-06	0.282988	7.74621	30.68	8.47593	0.141467
42	26		core from prism	0.0063	1	3419	19.16	26.4	0.06		315	0.00575	0.37	0.03879	1.22	0.04892	1.13		37	38.6	144	0.39	0.282843	9e-06	0.282854	3.00718	37	3.73655	0.318301
43	27		G- type tablets	0.017	7	3976	17.83	2.89	0.2		6935	0.00468	0.37	0.03016	0.42	0.04671	0.15		30.12	30.17	34.67	0.94	0.283038	3.1e-06	0.28301	8.52009	30.12	9.24987	0.109637
44	28		G- type tablets	0.0189	4	3445	15.21	3.24	0.16		5948	0.00468	0.39	0.03011	0.43	0.0467	0.17		30.08	30.12	33.38	0.92	0.283044	2.2e-06	0.283016	8.73226	30.08	9.46205	0.0778069
45
46	Duber diorite, Indus Valley (Z00/30/14)
47	29		prism tips	0.0316	4	376	131.45	2.37	0.43		104052	0.32727	0.33	5.1298	0.38	0.11368	0.1		1825.1	1841.1	1859.1	0.97
48	30		small spr	0.0156	6	232	78.47	2.89	0.45		24992	0.31502	0.34	4.9295	0.38	0.11349	0.11		1765.4	1807.3	1856.1	0.96
49	31		frags	0.0209	5	273	91.62	3.9	0.42		28915	0.31528	0.33	4.9383	0.38	0.1136	0.11		1766.6	1808.8	1857.8	0.96
50	32		spr	0.0329	5	210	67.8	15.2	0.41		8739	0.30394	0.33	4.761	0.38	0.11361	0.11		1710.8	1778	1857.9	0.96
51
52	Heuberger et al., 2007
53	number			weight	number	U	radiogenic	non-radiogenic	Th/U		206Pb/204Pb	206Pb/238U	error	207Pb/235U	error	207Pb/206Pb	error		age	age	age	error
54				(mg)	grains	(ppm)	Pbppm	Pbpg	(a)		(b)	(c,d)	2s%	(c)	2s	(c,d)	2s		206Pb/238U	207Pb/235U	207Pb/206U	corrected	hf176/177 corrected	2sig%	(t)
55	Mirkhani			diorite,	01B25,	Kohistan,	71?44'06"E/35?27'54"N
56	21			0.0017	1	384	7.43	1.1	0.77		699	0.0175	0.78	0.11596	1.64	0.04807	1.43		111.82	111.4	102.52	0.49	0.283113	7	0.283102		111.82	14.6
57	22			0.0019	2	135	2.54	0.5	0.59		574	0.01743	2.31	0.11772	6.32	0.04899	6.03		111.39	113.01	147.28	0.31	0.2831	10	0.283089		111.39	14.2
58	23			0.0036	3	162	3.1	0.4	0.64		1669	0.01755	0.87	0.11803	1.39	0.04877	1.3		112.17	113.28	136.73	0.41					112.17
59	24			0.0012	3	291	5.48	3.1	0.64		143	0.0174	0.52	0.10954	3.51	0.04566	3.38		111.2	105.54	103.74	0.41	0.283086	14	0.283075		111.2	13.7
60	25			0.0026	2	338	6.19	4	0.52		258	0.01734	1.81	0.11679	2.32	0.04885	2.24		110.82	112.16	140.62	0.43					110.82
61	Meta-gabbro,			01B24,	Kohistan,	71?46'01"E/35?24'25"N
62	26			0.0652	3	512	3.41	2.7	0.24		5356	0.00688	0.34	0.04454	0.41	0.04697	0.17		44.18	44.24	47.28	0.91	0.283076	3	0.283072		44.18	11.8
63	27			0.0398	4	430	2.94	1.5	0.24		5227	0.00706	0.42	0.04581	0.45	0.04706	0.26		45.36	45.48	52.03	0.82	0.283087	2	0.283083		45.36	12.2
64	28			0.0166	5	251	1.97	0.6	0.35		3538	0.00778	0.61	0.05065	0.67	0.04736	0.59		49.8	50.17	67.64	0.58	0.283076	4	0.283071		49.8	11.9
65	29			0.017	3	640	4.56	0.7	0.31		7042	0.00714	0.34	0.04657	0.4	0.04727	0.21		45.89	46.21	62.88	0.85	0.283041	4	0.283037		45.89	10.6
66	Granite			dyke,	01B22,	Kohistan,	71?47'29"E/35?29'09"N
67	30			0.0382	3	936	7.46	2.3	0.52		7331	0.0075	0.35	0.04893	0.4	0.04734	0.15		48.15	48.5	66.25	0.93	0.282583	3	0.282578		48.15	-5.6
68	Granitic			dyke,	01A07,	Kohistan,	71?47'51"E/35?28'31"N
69	38			0.0059	2	339	2.32	1.9	0.36		423	0.006	1.09	0.03944	2.72	0.04477	2.59		38.55	39.28	83.99	0.32	0.283062	7	0.283059		38.55	11.2
70	39			0.0056	2	689	4.66	0.5	58		3025	0.00623	0.81	0.04048	0.71	0.04716	0.61		40.01	40.3	57.21	0.69	0.283044	11	0.28304		40.01	10.5
71	40			0.0034	3	369	2.49	1	1.89		515	0.00603	0.67	0.03847	2.11	0.04628	2		38.74	38.33	12.4	0.32	0.282981	13	0.282977		38.74	8.3
72	41			0.003	3	737	5.03	0.7	0.39		1198	0.00607	1.13	0.03969	1.52	0.04747	1.42		38.98	39.53	72.7	0.46	0.282995	10	0.282991		38.98	8.8
73	42			0.0053	4	591	4.72	0.9	0.22		1776	0.00763	0.66	0.05075	0.79	0.04825	0.74		49	50.27	111.34	0.49	0.282905	5	0.2829		49	5.8
74
75	No			weight	Concentration				Th/Ua					Atomic ratios					Ages			corr.	176Hf/177Hf	± 2s	176Hf/177Hf	eps Hf
76				(mg)	U	Pb	Pb rad	Pb com.			206/204b	207/235c	error	206/238cd	error	207/206cd	error		206/238d	207/235	207/206d	coeff.	(meas.)		(T)	(0)
77	Bouilhol et al., 2011				(ppm)	(ppm)	(ppm)	(pg)					2s (%)		2s (%)		2s (%)						a)		b)
78	G-13/2			0.004	10	0.57	0.15	2.09	0.13		38	0.11436	8.4	0.0159763	0.61	0.0519154	7.9		102.176	109.94	281.91	0.81	0.283142	7.5e-06	0.283141	13.0815	102.176	15.4207	0.5	0.161705
79	G-13/3			0.0038	5	0.3	0.08	1.22	0.08		36	0.11566	8.963	0.0157365	0.76	0.0533056	8.4		100.654	111.13	342.02	0.75	0.283129	7.9e-06	0.283128	12.6219	100.654	14.9609	0.5	0.189071
80	P63/1			0.0044	17	0.29	0.29	0.75	0.65		122.56	0.11446	4.68	0.0156041	0.28	0.0532002	4.55		99.8139	110.04	337.35	0.49	0.283125	5.1e-05	0.283124	12.4782	99.8139	14.8173	0.5	0.197618
81	P63/3			0.0032	21.5	0.39	0.39	0.82	0.92		106.7	0.10541	5.99	0.015663	0.28	0.0488097	5.85		100.188	101.76	138.74	0.52	0.283133	1.42e-05	0.283132	12.7666	100.188	15.1057	0.5	0.180456
82	P63/4			0.0072	6.45	0.12	0.12	0.72	1.21		85	0.09545	8.99	0.0154618	0.36	0.0447729	8.78		98.9102	92.56		0.6	0.283111	3.7e-06	0.28311	12.0044	98.9102	14.3434	0.5	0.225805
83	P63/6			0.0044	6	0.17	0.12	0.93	1.22		50	0.10672	12.13	0.0161317	0.4	0.0479804	11.93		103.162	102.96	98.34	0.51	0.283146	1.25e-05	0.283145	13.2263	103.162	15.5655	0.5	0.153082
84	D101/4			0.0029	10.8862	0.522933	0.27	0.835412	1.95422		58.4053	0.121309	7.6954	0.0164591	0.525334	0.0534547	7.29		105.238	116.258	348.15	0.785511	0.283119	1.13e-05	0.283118	12.2715	105.238	14.6105	0.5	0.20992
85	D101/6			0.0025	7.88374	0.137104	0.14	0.525965	0.528934		59.8514	0.116535	13.8156	0.016246	0.599763	0.0520244	13.3732		103.887	111.926	286.47	0.747572	0.28315	1.01e-05	0.283149	13.3678	103.887	15.707	0.5	0.144657
86	G12/1			0.0028	14	0.303	0.225	1.52	0.22		45	0.109	15.89	0.0163959	1.11	0.0482157	14.89		104.838	105.05	110.07	0.91	0.283132	1.7e-05	0.283131	12.7	104.838	15.1	0.5	0.18
87	G12/2			0.002	41.8	1.89	0.65	2.74	0.21		33.85	0.10834	15.49	0.016206	1.14	0.0484855	14.48		103.633	104.45	123.29	0.89	0.283163	1.43e-05	0.283162	13.8275	103.633	16.1669	0.5	0.117264
88	P8/1			0.002	29.6	0.47	0.24	0.63	0.24		114.56	0.11106	4.475	0.0164459	0.335	0.0489779	4.196		105.154	106.96	146.86	0.84	0.283155	1.86e-05	0.283154	13.5446	105.154	15.8839	0.5	0.134123
89	K08-18/2			0.0125	127.547	1.99588		2.5903	0.212786		582.272	0.0971183	0.737911	0.0146216	0.11028	0.0481731	0.690346		93.5745	94.1128	107.779	0.492138	0.283095	4e-06	0.283094	11	93.5745	13.2	0.5	0.29
90
91
92	Schaltegger et al., 2002					U	Pbrad	Pbnrad	Th/U			206/238	2sig	207/235	2s	207/206	2s		age238				hf/hf	sig
93	Sarangar Gabbro, Indus valley
94	1					149	2.44	4.1	0.53			0.01553	0.37	0.103	0.48	0.04808	0.31		99.3				0.28312	22			99.3	14.5
95	2					182	2.99	2	0.58			0.01544	0.33	0.1022	0.41	0.04803	0.19		98.8				0.283106	5			98.8	14
96	3					129	2.1	3.1	0.55			0.01545	0.33	0.1024	0.4	0.04806	0.17		98.9				0.28311	7			98.9	14.2
97	4					189	3.08	1.9	0.53			0.01549	0.39	0.1026	0.65	0.04805	0.52		99.1				0.283108	5			99.1	14.1
98	Granite, Indus valley
99	5					358	5.82	1.7	0.6			0.01517	0.41	0.1006	0.81	0.04807	0.68		97.1				0.283096	28			97.1	13.7
100	6					507	8.98	8.5	0.55			0.01517	0.5	0.1005	1.68	0.04807	1.55		97				0.283114	16			97	14.3
101	7					1377	22.25	2.2	0.57			0.01512	0.37	0.1006	0.9	0.04797	0.78		97.3				0.283138	13			97.3	15.2
102	Diorite, Indus valley
103	8					16.26	0.25	2.8	0.68			0.01435	2.12	0.0869	31	0.04392	29.5		91.8				0.283141	15			91.8	15.2
104	9					38.2	0.59	5.8	0.68			0.01426	0.86	0.0895	7.94	0.0455	7.54		91.3				0.283112	7			91.3	14.1
105	10					33.23	0.53	1	0.67			0.01442	0.71	0.0964	4.19	0.04848	3.97		92.3				0.283071	13			92.3	12.7
106	Kyanite-bearing dyke, Swat valley
107	11					6.74	0.08	1.1	0.05			0.01304	2.4	0.0802	16.3	0.04459	15.7		83.5				0.283108	8			83.5	13.8
108	12					2.75	0.03	1.5	0.01			0.01299	2.16	0.073	36.5	0.04077	35.2		83.2				0.283121	12			83.2	14.2
109	13					5.29	0.06	4.3	0.01			0.01272	2.44	0.0739	35.44	0.04214	33.8		81.5				0.28311	5			81.5	13.8
110	Chilas gabbronorite, Swat valley
111	14					113	1.75	5	0.91			0.01337	0.36	0.0882	0.45	0.04783	0.24		85.6				0.283012	5			85.6	10.5
112	15					107	1.74	4.5	1.09			0.01337	0.35	0.0882	0.52	0.04778	0.36		85.7				0.28301	5			85.7	10.4
113	16					99	1.62	8.8	1.12			0.01337	0.37	0.0884	0.61	0.04792	0.45		85.7				0.283011	5			85.7	10.4
114	17					103	1.67	1.7	1.08			0.0134	0.36	0.0883	0.64	0.04776	0.51		85.8								85.8
115
116
117	Bouilhol et al., 2013
118			U-Pb results																				Hf results*
119			Measured Isotopic Ratios								Calculated Ages
120	Sample			207Pb/235U	1sig s.e	206Pb/238U	1sig s.e	Rho	207Pb/206Pb	1sig s.e	207Pb/235U	1sig s.e	206Pb/238U	1sig s.e	207Pb/206Pb	1sig s.e			Concordia	1sig s.e	MSWD	Probability	Th232	U238
121			Analysis								Ma	Ma	Ma	Ma	Ma	Ma			age (Ma)	Ma	(of concordance)		ppm	ppm	176Hf/177Hf	2sig s.e	176Lu/177Hf	2sig s.e	176Yb/177Hf	2sig s.e	178Hf/177Hf	2sig s.e
122	KO8-3		ap09a48	0.0702547	0.00820355	0.0118742	0.000797176	0.28747	0.0432803	0.0015445	68.9411	7.78296	76.0953	5.07862	-151.464	88.5667			74.4552	9.4813	0.807573	0.36884	125.016	154.225									76.0953
123			ap09a50	0.0754209	0.00680638	0.0119701	0.000635709	0.294243	0.0443185	0.00173633	73.8306	6.4264	76.706	4.04957	-92.967	96.1352			76.1101	7.63797	0.195424	0.658439	93.0419	126.691	0.282927	2.33287e-05	0.00174758	1.82992e-05	0.0435875	0.00039656	1.4673	4.72242e-05	76.706	7.0072	0.82455
124			ap09a51	0.0827959	0.00603165	0.0121633	0.000410728	0.231764	0.0468814	0.00142616	80.7701	5.65614	77.9367	2.61591	43.1898	72.7299			78.2374	5.09172	0.250516	0.616709	320.611	263.61	0.282942	3.42983e-05	0.00386306	9.0331e-05	0.0963545	0.00244534	1.46731	5.10299e-05	77.9367	7.59019	1.2122
125			ap09a52	0.0800034	0.00956054	0.0117795	0.000627052	0.222727	0.0563091	0.0018859	78.1481	8.9885	75.4917	3.99518	464.576	74.2037			75.7522	7.79286	0.0871914	0.76778	253.794	247.384	0.282898	3.06863e-05	0.00202332	5.22919e-05	0.0487666	0.00149276	1.46727	4.37501e-05	75.4917	6.05552	1.08471
126			ap09a53	0.072841	0.00946247	0.0107589	0.00164081	0.58699	0.0445043	0.00200963	71.3919	8.95569	68.9861	10.4648	-82.7092	110.583			70.6289	17.0063	0.0726189	0.787562	57.6837	74.9539	0.282865	2.36075e-05	0.00124854	1.99422e-05	0.0305567	0.000491651	1.46723	4.03411e-05	68.9861	4.81199	0.834584
127			ap09a54	0.0597367	0.00621486	0.0114008	0.000545023	0.229751	0.0429372	0.00153232	58.913	5.95474	73.0788	3.47384	-171.254	88.9143			70.294	6.51802	5.32536	0.0210171	129.298	160.945									73.0788
128			ap09a58	0.069542	0.00982242	0.0119959	0.000908412	0.268069	0.0438885	0.00206523	68.2647	9.32504	76.8706	5.78659	-116.944	116.003			75.0576	10.8558	0.813577	0.367066	68.3698	90.7137	0.282915	3.31411e-05	0.00169646	9.48558e-05	0.0414427	0.00225382	1.46723	4.08795e-05	76.8706	6.48316	1.17141
129			ap09a59	0.0809193	0.00493288	0.0119634	0.000379767	0.260366	0.0548137	0.00451473	79.0089	4.6338	76.6631	2.41919	404.631	184.398			76.9819	4.67094	0.255651	0.613125	633.419	689.051									76.6631
130			ap09a60	0.0406159	0.00706007	0.0122192	0.000884556	0.208229	0.0303786	0.00137589	40.4252	6.88888	78.2925	5.63338	-1120.55	137.947			63.6226	9.49206	23.0572	1.57255e-06	85.554	94.0151									78.2925
131			ap09a61	0.128516	0.0128986	0.0121681	0.000861077	0.352537	0.0793952	0.00424659	122.764	11.6056	77.9669	5.48413	1182.01	105.717			80.3159	10.9016	16.098	6.01486e-05	73.8475	79.4328									77.9669
132			ap09a62	0.0779674	0.0102013	0.0123227	0.000607634	0.188436	0.0603434	0.00270854	76.2321	9.60905	78.9517	3.86938	615.913	96.9224			78.7182	7.55959	0.0794563	0.778035	77.516	101.379	0.282899	3.89266e-05	0.00175208	3.856e-05	0.0397846	0.00106191	1.46731	5.21535e-05	78.9517	6.06091	1.37599
133			ap09a64	0.0803754	0.00978333	0.0127512	0.000697502	0.224699	0.0565862	0.00281655	78.4978	9.19479	81.6797	4.43977	475.443	110.072			81.287	8.58098	0.118137	0.731065	84.3651	119.049	0.282875	3.09215e-05	0.00212854	0.000117969	0.0555206	0.00295591	1.46725	4.31898e-05	81.6797	5.25334	1.09311
134			ap09a67	0.0680072	0.00947918	0.011739	0.000789654	0.241301	0.0478923	0.00224518	66.8066	9.01211	75.2339	5.03137	93.9509	111.019			73.7825	9.55592	0.843743	0.358325	90.599	99.2711	0.282926	3.47374e-05	0.00153964	7.08681e-05	0.0360891	0.00152124	1.46731	4.61612e-05	75.2339	6.82825	1.22779
135			ap09a68	0.118766	0.00937829	0.0121662	0.000668099	0.347716	0.061128	0.00269066	113.953	8.51166	77.9553	4.25508	643.742	94.6073			80.6311	8.41871	19.2388	1.15346e-05	54.5079	82.2948									77.9553
136	KO8-13		ap08b04	0.0508957	0.0115299	0.00775905	0.000566426	0.161123	0.0653884	0.002582	50.4065	11.1403	49.825	3.6233	786.859	82.9114			49.856	7.14862	0.00272055	0.958406	87.5885	259.484									49.825
137			ap08b05	0.0518864	0.00572837	0.00783982	0.000371883	0.214829	0.0503339	0.00224067	51.3633	5.52958	50.3416	2.37866	210.442	103.181			50.436	4.64607	0.0341007	0.85349	132.229	336.664	0.282774	4.86973e-05	0.000706036	5.67599e-06	0.0221	0.000182386	1.46731	6.48516e-05	50.3416	1.14101	1.72213
138			ap08b06	0.0502991	0.00716953	0.00758472	0.000544807	0.251966	0.0515998	0.00212212	49.8299	6.93119	48.7098	3.48562	267.715	94.3401			48.8508	6.74878	0.0261074	0.871637	104.697	293.309	0.282705	3.73596e-05	0.00066857	6.36544e-06	0.0199644	0.000300603	1.46723	5.591e-05	48.7098	-1.33242	1.32151
139			ap08b07	0.0463754	0.0082816	0.00699265	0.000764986	0.306306	0.0518778	0.00182748	46.0295	8.03631	44.9207	4.89717	280.027	80.6273			45.1254	9.33405	0.0190633	0.890184	131.424	336.059	0.282695	5.15538e-05	0.00040283	7.50828e-06	0.012518	0.000366062	1.46723	4.82561e-05	44.9207	-1.75499	1.82366
140			ap08b08	0.0552895	0.00536532	0.00787903	0.000489146	0.319877	0.0523163	0.00207398	54.6429	5.16243	50.5924	3.12858	299.259	90.4235			51.3038	5.99287	0.626786	0.428536	72.4675	221.558	0.282727	4.60326e-05	0.000773399	2.25032e-05	0.0231615	0.000573226	1.46725	5.30465e-05	50.5924	-0.512622	1.62816
141			ap08b09	0.0471435	0.00499883	0.0074299	0.000469781	0.298151	0.0465893	0.00160458	46.7746	4.84721	47.7191	3.00607	28.2275	82.575			47.5329	5.69599	0.0374408	0.846569	99.0267	309.258	0.282701	3.65724e-05	0.000627224	2.0021e-05	0.0186955	0.00068889	1.46724	6.00478e-05	47.7191	-1.49039	1.29368
142			ap08b10	0.0469887	0.00475475	0.00727691	0.000325934	0.221319	0.0534431	0.00180601	46.6245	4.61122	46.7401	2.08592	347.654	76.4188			46.7281	4.05944	0.000625913	0.980054	111.3	306.548	0.282741	3.99146e-05	0.000568981	3.74721e-06	0.0168896	0.000147624	1.46729	5.57774e-05	46.7401	-0.0964526	1.4117
143			ap08b13	0.0521174	0.00496457	0.00824302	0.000519126	0.330566	0.0438807	0.00156135	51.5863	4.79123	52.9201	3.31914	-117.383	87.7237			52.5919	6.19631	0.0758953	0.782939	110.173	302.733									52.9201
144			ap08b14	0.0510706	0.0114126	0.00789267	0.000799019	0.226511	0.0534147	0.00200509	50.5755	11.0251	50.6797	5.11047	346.455	84.9055			50.6683	9.93105	8.88144e-05	0.992434	150.29	343.901	0.282728	3.55369e-05	0.00054251	9.30937e-06	0.0161138	0.000404381	1.46728	4.78729e-05	50.6797	-0.459438	1.25693
145			ap08b15	0.0543297	0.00516087	0.00817854	0.000322754	0.207721	0.0564952	0.00189713	53.7191	4.97023	52.5078	2.06373	471.882	74.3059			52.6119	4.03793	0.0593349	0.807549	168.122	379.075									52.5078
146			ap08b16	0.0497584	0.00612996	0.0078141	0.000466551	0.242326	0.0558121	0.00232723	49.3071	5.92923	50.1771	2.98426	444.903	92.6989			50.0637	5.76315	0.0213467	0.883836	71.1916	236.218	0.282669	5.00615e-05	0.000532985	1.3385e-05	0.0152688	0.000461659	1.46724	5.28625e-05	50.1771	-2.5435	1.77103
147			ap08b17	0.0529849	0.00508296	0.00853198	0.000351594	0.214782	0.0455209	0.00175934	52.4231	4.90145	54.7673	2.24734	-27.6897	93.6537			54.5076	4.36012	0.226159	0.634387	222.491	458.39									54.7673
148			ap08b19	0.0430767	0.00607792	0.00757801	0.000704804	0.329587	0.0434901	0.00191895	42.8234	5.91655	48.6668	4.50929	-139.472	109.252			46.8668	8.19057	0.906864	0.340951	87.5077	274.489									48.6668
149	LB08-7		ap09a122	0.0571205	0.0078661	0.0085737	0.000681993	0.288812	0.0490886	0.00209206	56.4032	7.55553	55.034	4.35903	152.065	99.8445			55.2611	8.34953	0.0328229	0.856232	94.3963	232.22	0.283002	5.81823e-05	0.002222	0.000180164	0.0761622	0.00597587	1.46722	6.01007e-05	55.034	9.26272	2.0559
150			ap09a123	0.0563374	0.00906498	0.00965069	0.000477891	0.153876	0.0519488	0.00384928	55.6507	8.71353	61.9141	3.05124	283.156	169.501			61.4844	5.98353	0.511854	0.47434	262.808	277.428	0.283021	5.11493e-05	0.00172939	3.49927e-05	0.058004	0.00114719	1.46728	6.62333e-05	61.9141	10.1053	1.80726
151			ap09a124	0.0570837	0.00985726	0.00873435	0.000759343	0.251729	0.0688067	0.00409293	56.3678	9.46841	56.0608	4.85266	892.95	122.817			56.1016	9.37134	0.00104644	0.974188	85.2498	76.5308	0.283046	7.65645e-05	0.000789371	1.92e-05	0.0269193	0.00152704	1.46719	9.65086e-05	56.0608	10.893	2.70502
152			ap09a126	0.0605658	0.012996	0.00982601	0.000969279	0.229859	0.0472366	0.0034873	59.7071	12.4423	63.0334	6.18757	61.2055	175.908			62.5963	11.929	0.0703281	0.79086	476.116	282.315									63.0334
153			ap09a131	0.0660508	0.0119098	0.00953216	0.000926765	0.269602	0.0576321	0.00340228	64.9449	11.3437	61.1572	5.9179	515.804	129.649			61.656	11.4541	0.112202	0.73765	236.468	163.996	0.282973	5.70117e-05	0.00224641	3.12265e-05	0.0730806	0.00151248	1.46723	7.41476e-05	61.1572	8.34621	2.01474
154			ap09a132	0.0399751	0.0060913	0.00890608	0.000562194	0.207133	0.038784	0.0017739	39.7997	5.94726	57.1581	3.59214	-431.331	120.057			53.3361	6.6411	7.7225	0.00545365	211.912	186.653									57.1581
155			ap09a133	0.0428364	0.00695136	0.00837983	0.000552197	0.203036	0.0582172	0.00782749	42.5896	6.76836	53.7948	3.53011	537.944	294.168			52.0069	6.70562	2.60526	0.106513	178.927	159.509									53.7948
156			ap09a134	0.0617118	0.00675781	0.00915272	0.000598241	0.298441	0.061671	0.00315652	60.8037	6.46293	58.7338	3.82153	662.721	109.665			59.0921	7.30862	0.102768	0.748533	96.9613	108.969	0.282963	4.09184e-05	0.00143334	3.51477e-05	0.0431252	0.000695801	1.46725	6.79183e-05	58.7338	7.99366	1.44607
157			ap09a135	0.059158	0.00650588	0.00908512	0.000370563	0.185442	0.0570858	0.00191428	58.3584	6.23699	58.302	2.36729	494.848	73.9093			58.3061	4.64484	8.15705e-05	0.992768	1718.89	652.88	0.28292	5.19138e-05	0.00328675	6.67787e-05	0.0997645	0.00290814	1.46725	5.87863e-05	58.302	6.37006	1.83493
158			ap09a137	0.0429987	0.0062106	0.0088641	0.000440679	0.1721	0.051743	0.0022913	42.7476	6.04616	56.8899	2.81584	274.071	101.463			55.0164	5.38984	5.23272	0.0221658	281.303	267.308									56.8899
159			ap09a141	0.057677	0.00580377	0.00931483	0.000463371	0.247181	0.050652	0.00244579	56.9376	5.57169	59.7693	2.95951	225.024	111.622			59.3482	5.67841	0.253864	0.614366	237.603	231.472	0.28298	5.41837e-05	0.00152751	2.21136e-05	0.0473811	0.00109157	1.46725	6.82407e-05	59.7693	8.61314	1.91475
160			ap09a142	0.038166	0.00506453	0.0087486	0.00044256	0.190608	0.0394762	0.0019553	38.0319	4.95338	56.1518	2.82818	-385.113	128.792			52.5109	5.26174	12.2116	0.000474929	238.669	267.597									56.1518
161			ap09a143	0.0645489	0.00864909	0.00906627	0.000656847	0.270348	0.0632321	0.00315981	63.5133	8.24964	58.1816	4.19627	716.048	106.135			58.8311	8.15054	0.422916	0.515488	298.961	194.152	0.282982	5.24936e-05	0.000905094	4.02008e-05	0.0301503	0.00184532	1.46726	7.10489e-05	58.1816	8.68372	1.85501
162			ap09a144	0.0671508	0.00720192	0.00923877	0.000502722	0.253681	0.0646592	0.00310117	65.9921	6.85256	59.2835	3.21109	763.266	101.089			59.9611	6.27249	0.970987	0.324433	71.2307	156.714									59.2835
163	LB08-12		ap10a48	0.0484992	0.00697689	0.00891189	0.000605489	0.236145	0.0451359	0.00186379	48.0883	6.75653	57.1953	3.86876	-48.3119	100.456			55.5118	7.30338	1.72831	0.188622	259.85	217.676									57.1953
164			ap10a49	0.0534982	0.00406051	0.00870405	0.000292839	0.221634	0.049093	0.0014124	52.918	3.9136	55.8671	1.87147	152.276	67.3988			55.5092	3.61881	0.559789	0.454345	571.977	411.499									55.8671
165			ap10a50	0.0598853	0.00422846	0.00944431	0.00027358	0.205127	0.0474253	0.0011969	59.0554	4.05092	60.5962	1.74711	70.6975	60.0273			60.4468	3.40413	0.143564	0.704762	57.59	922.506	0.283057	2.48624e-05	0.00044918	3.01016e-05	0.0126183	0.00102974	1.46724	4.33392e-05	60.5962	11.3836	0.878353
166			ap10a51	0.048093	0.00649731	0.00991078	0.000753834	0.281505	0.0400834	0.00243382	47.6949	6.29454	63.5745	4.81184	-345.584	156.623			58.4015	8.5717	5.55332	0.0184457	52.6557	139.093									63.5745
167			ap10a57	0.0481768	0.00508956	0.00925234	0.000418809	0.214235	0.0439891	0.0014263	47.7761	4.93033	59.3702	2.67506	-111.301	79.8437			57.3888	5.06444	5.24852	0.0219654	206.415	367.047									59.3702
168			ap10a58	0.0542424	0.00864556	0.00925368	0.000636441	0.215754	0.0468179	0.00140448	53.6349	8.32688	59.3788	4.06514	39.9471	71.7655			58.6275	7.82696	0.464979	0.495306	433.517	391.457	0.283021	2.61546e-05	0.00106881	1.04634e-05	0.0304152	0.000369538	1.46729	4.7284e-05	59.3788	10.0723	0.924121
169			ap10a59	0.0561814	0.00519595	0.00857555	0.000430674	0.271509	0.0478546	0.00155967	55.5008	4.99524	55.0459	2.7527	92.0884	77.21			55.1156	5.28714	0.00825291	0.927613	428.054	350.845	0.283012	3.0361e-05	0.0019972	8.6829e-05	0.0609163	0.00290923	1.46725	5.58173e-05	55.0459	9.6164	1.07278
170			ap10a60	0.0619923	0.00610283	0.00888647	0.000247815	0.141636	0.0567335	0.00185529	61.0719	5.83499	57.0329	1.58345	481.187	72.2458			57.1741	3.1404	0.47893	0.488912	37.0857	785.394	0.283044	3.02748e-05	0.000690584	6.22781e-05	0.0191465	0.0019363	1.46727	4.70962e-05	57.0329	10.8572	1.06961
171			ap10a61	0.0658597	0.00588885	0.0091646	0.000368312	0.22473	0.0590163	0.00173977	64.7628	5.60997	58.8097	2.35273	567.697	64.1732			59.2951	4.61601	1.13485	0.286748	446.08	377.075									58.8097
172			ap10a62	0.0563117	0.00967286	0.00890634	0.000667213	0.218062	0.0485576	0.00207281	55.6261	9.29807	57.1598	4.26316	126.527	100.481			56.9919	8.27775	0.0269636	0.869569	688.359	536.213									57.1598
173			ap10a63	0.0460229	0.00566571	0.00840752	0.000600076	0.289887	0.0480549	0.00221938	45.6874	5.49975	53.9718	3.83609	101.974	109.209			51.7701	7.04924	2.1059	0.146739	92.1676	129.892	0.283021	2.5997e-05	0.000654347	3.91512e-05	0.0183629	0.00156942	1.46726	3.85359e-05	53.9718	9.97677	0.918553
174			ap10a66	0.0577538	0.00303398	0.00899464	0.000208615	0.220749	0.0472815	0.000856499	57.0113	2.91245	57.7239	1.33283	63.4698	43.1445			57.6471	2.59021	0.0594591	0.80735	64.4705	1351.09	0.283044	3.39051e-05	0.00110777	2.51959e-05	0.0251663	0.00110895	1.46727	4.85936e-05	57.7239	10.8421	1.19787
175			ap10a67	0.053336	0.00795682	0.00909252	0.000530797	0.195657	0.0509344	0.0015333	52.7616	7.67013	58.3493	3.39091	237.863	69.4279			57.7475	6.5744	0.521329	0.470274	334.06	426									58.3493
176			ap10a68	0.0618682	0.00669419	0.00937563	0.000524979	0.258751	0.0472168	0.00145536	60.9533	6.40114	60.1576	3.3528	60.2057	73.4565			60.2675	6.46711	0.0153915	0.901264	49.9604	1120.61									60.1576
177			ap10a69	0.0683681	0.0157316	0.00941685	0.000435975	0.100602	0.0823745	0.00279578	67.1497	14.9514	60.4209	2.78426	1254.44	66.3857			60.5266	5.54849	0.201809	0.653265	249.516	743.844									60.4209
178			ap10a70	0.0623201	0.00633186	0.0096678	0.000318102	0.161922	0.0569655	0.00206327	61.3852	6.0521	62.0233	2.03098	490.198	79.8938			61.9862	4.00037	0.0110782	0.916176	600.772	529.3	0.283022	2.66043e-05	0.00102593	5.00064e-05	0.0292594	0.00194031	1.46725	5.01685e-05	62.0233	10.1751	0.940005
179			ap10a71	0.0552695	0.00306984	0.00903824	0.000255901	0.254876	0.0460729	0.000730655	54.6238	2.95381	58.0025	1.63487	1.43355	38.2159			57.454	3.12298	1.28045	0.257814	83.7083	1612.65									58.0025
180			ap10a72	0.04877	0.00460622	0.00913338	0.00040011	0.231913	0.0411758	0.00156754	48.3505	4.45959	58.6103	2.55593	-276.708	96.8494			56.6914	4.81751	5.014	0.0251432	247.252	355.847									58.6103
181	LB08-23		ap09a70	0.0486047	0.00439017	0.00724338	0.0003106	0.237371	0.0527284	0.00204159	48.1905	4.25108	46.5255	1.98786	317.127	88.034			46.7047	3.86906	0.153718	0.695004	178.196	350.929	0.282854	3.38275e-05	0.000412396	6.51734e-06	0.0120044	0.000268603	1.46723	4.97487e-05	46.5255	3.9168	1.19594
182			ap09a71	0.0447788	0.00355687	0.00702919	0.000249203	0.223163	0.0513649	0.00141314	44.479	3.45679	45.1546	1.59525	257.238	63.2288			45.0807	3.09906	0.0379468	0.845552	367.012	447.493	0.282832	3.08988e-05	0.000920983	3.46207e-05	0.0264941	0.000918375	1.46725	4.34544e-05	45.1546	3.09248	1.09248
183			ap09a73	0.0465754	0.00429181	0.00733116	0.000305792	0.226328	0.0507306	0.0014395	46.2236	4.1639	47.0873	1.95692	228.608	65.5522			46.9891	3.79658	0.0427077	0.836278	370.897	414.259	0.282856	3.00418e-05	0.00084436	1.79093e-05	0.0245843	0.000671327	1.46729	4.82448e-05	47.0873	3.96555	1.06209
184			ap09a76	0.0480999	0.00351847	0.00701907	0.000250488	0.243931	0.0505564	0.00129198	47.7016	3.40864	45.0898	1.60349	220.654	59.1229			45.3687	3.12359	0.590766	0.442121	593.221	612.133	0.282842	3.04623e-05	0.00107325	2.92824e-05	0.0302839	0.000751389	1.46728	3.9916e-05	45.0898	3.42931	1.07701
185			ap09a77	0.0449711	0.00759502	0.00733124	0.000648949	0.262064	0.0484161	0.00136722	44.6659	7.37997	47.0878	4.15295	119.652	66.5555			46.685	7.92773	0.105583	0.745231	451.686	541.64	0.28286	2.4065e-05	0.000525524	3.91629e-06	0.0144752	0.000144327	1.4673	4.51382e-05	47.0878	4.14122	0.850772
186			ap09a78	0.0411186	0.00493815	0.00727275	0.000360086	0.206135	0.0463964	0.00117974	40.9156	4.81608	46.7135	2.3045	18.2678	61.0791			45.9733	4.43784	1.41089	0.234912	506.937	621.266									46.7135
187			ap09a79	0.0511596	0.00620471	0.0076792	0.000471742	0.253258	0.0512615	0.00156154	50.6615	5.99353	49.3142	3.01787	252.606	70.068			49.4838	5.84409	0.050555	0.822103	351.816	384.563	0.282887	2.89287e-05	0.00077225	3.72124e-05	0.0203527	0.00108533	1.46725	4.68021e-05	49.3142	5.13983	1.02262
188			ap09a80	0.0559732	0.00870319	0.00755496	0.000596973	0.254094	0.0550342	0.00181445	55.3006	8.36865	48.5193	3.81948	413.612	73.6959			49.1504	7.48072	0.668841	0.413454	786.875	641.824									48.5193
189			ap09a81	0.0472017	0.00554887	0.00781589	0.000638442	0.347428	0.0425716	0.00189739	46.831	5.38027	50.1886	4.08374	-192.606	111.51			49.1837	7.47439	0.371948	0.541947	435.305	473.727									50.1886
190			ap09a82	0.0479536	0.0181086	0.00767794	0.000576384	0.0993972	0.0570321	0.00239993	47.5599	17.5458	49.3061	3.6873	492.775	92.7803			49.2654	7.3291	0.00989827	0.920747	726.256	634.436									49.3061
191			ap09a86	0.0433283	0.00489327	0.00759403	0.000326234	0.190195	0.0460123	0.00187092	43.0684	4.7622	48.7693	2.08719	-1.7387	98.0438			48.1583	4.04533	1.4039	0.236068	491.69	529.739									48.7693
192			ap09a87	0.0487848	0.00446539	0.00732605	0.000318861	0.237753	0.0527098	0.00136764	48.3648	4.32318	47.0546	2.04056	316.327	59.0024			47.1993	3.9678	0.091915	0.761755	471.884	500.338									47.0546
193			ap09a88	0.0500112	0.00315249	0.00782814	0.000262325	0.265806	0.045749	0.0014846	49.5515	3.04852	50.2669	1.67792	-15.5946	78.4536			50.1559	3.21827	0.0545413	0.815342	286.237	437.899	0.282885	3.01137e-05	0.000873314	2.47808e-05	0.0222673	0.000660023	1.46727	4.41756e-05	50.2669	5.08717	1.06452
194			ap09a89	0.0509278	0.00348675	0.00791732	0.000228312	0.210598	0.050539	0.00122878	50.4375	3.36882	50.8373	1.46024	219.858	56.2581			50.7989	2.84734	0.0140163	0.905757	336.592	533.232	0.282856	2.70512e-05	0.00074567	9.10298e-06	0.018719	0.00027969	1.46726	5.06453e-05	50.8373	4.05887	0.95636
195			ap09a90	0.0483153	0.00337489	0.00790061	0.0002966	0.268724	0.0455983	0.00114515	47.9103	3.26887	50.7304	1.89702	-23.5765	60.8076			50.2304	3.60861	0.727596	0.393659	255.801	411.567									50.7304
196			ap09a91	0.0602216	0.0126248	0.00799054	0.00094819	0.28302	0.0682312	0.00374704	59.3776	12.0909	51.3056	6.06397	875.585	113.695			52.2026	11.8328	0.457728	0.498685	53.2175	100.334									51.3056
197	LB08-25		ap09a25	0.0537123	0.00533398	0.00902294	0.000478388	0.266946	0.0477046	0.00209142	53.1242	5.13996	57.9048	3.05631	84.6452	104.004			56.9986	5.78374	0.837452	0.360122	270.011	222.657									57.9048
198			ap09a26	0.0471435	0.0185544	0.00700474	0.00167104	0.303068	0.0574368	0.00350849	46.7746	17.9916	44.998	10.6973	508.344	134.322			45.307	20.4632	0.00980636	0.92112	112.22	99.3487	0.28302	2.54944e-05	0.00070404	1.16096e-05	0.0183293	0.000380537	1.46725	4.91636e-05	44.998	9.7334	0.9008
199			ap09a27	0.0601747	0.00652586	0.00852581	0.000627599	0.339385	0.0596482	0.0031441	59.3326	6.25015	54.7279	4.01156	590.836	114.299			55.6355	7.64265	0.554355	0.456547	62.5176	73.2394	0.282987	2.33839e-05	0.000698241	1.02483e-05	0.0164683	0.000261913	1.46726	5.92739e-05	54.7279	8.78008	0.826323
200			ap09a30	0.0415894	0.00590052	0.00794143	0.000629995	0.279577	0.0429364	0.0015788	41.3747	5.75206	50.9915	4.02921	-171.298	91.6134			48.3783	7.3688	2.55605	0.109873	317.434	244.136									50.9915
201			ap09a31	0.0480292	0.0097198	0.00708987	0.000599506	0.208917	0.0813655	0.00572388	47.6331	9.41702	45.543	3.83746	1230.29	138.076			45.712	7.52237	0.0493854	0.824137	115.168	82.4121	0.283003	2.67938e-05	0.00082506	9.82303e-06	0.02177	0.000234745	1.46729	5.29452e-05	45.543	9.14507	0.946768
202			ap09a32	0.0453229	0.0134564	0.00662784	0.000676587	0.171914	0.0899285	0.00517694	45.0077	13.071	42.5848	4.33284	1424.01	109.965			42.7128	8.55505	0.0344263	0.852804	58.3528	63.3462	0.283009	3.62141e-05	0.00049808	4.31965e-06	0.0125541	0.000124908	1.46725	4.80709e-05	42.5848	9.31091	1.27961
203			ap09a33	0.0467081	0.0215439	0.00798545	0.0012181	0.165357	0.0581866	0.00315089	46.3523	20.8992	51.2731	7.79018	536.794	118.5			50.8948	15.2425	0.0548071	0.8149	135.221	141.46									51.2731
204			ap09a34	0.0522625	0.00513833	0.00762101	0.000330825	0.220762	0.0545308	0.001865	51.7263	4.95825	48.9419	2.11651	393.035	76.7243			49.1869	4.14233	0.316609	0.573654	588.721	359.638	0.283019	4.56333e-05	0.00141703	3.61597e-05	0.0359262	0.00105109	1.46724	4.2373e-05	48.9419	9.7496	1.61238
205			ap09a35	0.0497986	0.00781903	0.00766817	0.000439451	0.182496	0.063053	0.00264856	49.3459	7.5627	49.2436	2.81132	710.02	89.3035			49.2508	5.52134	0.000182532	0.989201	258.742	217.102									49.2436
206			ap09a36	0.0664715	0.00513488	0.00734741	0.00037876	0.333661	0.0628321	0.00309351	65.3455	4.8889	47.1913	2.42384	702.553	104.801			48.6964	4.78318	14.8474	0.000116567	166.68	131.254									47.1913
207			ap09a39	0.0550147	0.0367685	0.00804084	0.000715393	0.0665604	0.112065	0.00686957	54.3785	35.3873	51.6273	4.57493	1833.17	111.073			51.6494	9.13201	0.00603137	0.9381	440.558	299.786									51.6273
208			ap09a41	0.0470771	0.00483186	0.00802463	0.000454529	0.275932	0.0413325	0.00175717	46.7102	4.6856	51.5236	2.90675	-267.053	107.945			50.5294	5.46918	1.01527	0.313645	349.712	278.864	0.28306	3.42621e-05	0.00144948	2.97144e-05	0.0372048	0.00060834	1.4673	5.38542e-05	51.5236	11.2698	1.21042
209			ap09a42	0.0469993	0.00501704	0.00779703	0.000422458	0.253786	0.0518415	0.0019662	46.6348	4.86554	50.0679	2.70227	278.425	86.8333			49.5043	5.15752	0.486134	0.485655	220.003	198.091	0.282989	3.75033e-05	0.00177506	0.000115524	0.0508776	0.00325261	1.46728	4.82969e-05	50.0679	8.71648	1.32525
210			ap09a44	0.0562864	0.00655233	0.00852137	0.000528488	0.266381	0.0576953	0.00284561	55.6017	6.2986	54.6995	3.37807	518.21	108.273			54.8297	6.50642	0.0204647	0.88625	106.6	119.688	0.28296	3.33249e-05	0.00208211	0.000137291	0.0615722	0.00381309	1.46725	4.87332e-05	54.6995	7.77054	1.17773
211	LB09-5.2B		ap10a18	0.0614109	0.00632302	0.00937568	0.000567784	0.294084	0.0555402	0.00222181	60.5159	6.04882	60.158	3.62617	434.035	89.1014			60.223	6.90856	0.00347743	0.952978	153.545	194.875	0.282995	3.74188e-05	0.00195167	9.24962e-05	0.0468505	0.00207646	1.46723	4.83112e-05	60.158	9.11391	1.32224
212			ap10a19	0.0615899	0.00230856	0.00954049	0.000196964	0.275394	0.0468686	0.000597006	60.6871	2.20807	61.2104	1.25771	42.535	30.4577			61.1236	2.40516	0.0555924	0.813604	1157.55	2284.41	0.282989	3.10981e-05	0.0038547	6.21746e-05	0.102846	0.00183103	1.46727	4.43507e-05	61.2104	8.86945	1.09892
213			ap10a20	0.0587136	0.00625632	0.00973369	0.000377182	0.181829	0.0567076	0.00199796	57.9323	6.00027	62.444	2.40803	480.181	77.8508			62.0489	4.69899	0.559029	0.454655	301.889	278.228	0.282981	3.14139e-05	0.00145973	2.46596e-05	0.0362514	0.000648777	1.46717	3.81427e-05	62.444	8.71756	1.11011
214			ap10a21	0.0811202	0.0158487	0.00956939	0.00144747	0.387108	0.0609333	0.00242592	79.1975	14.885	61.395	9.24254	636.881	85.6687			64.1256	17.9531	1.56145	0.211458	165.148	203.818	0.282999	3.14762e-05	0.00107649	5.14064e-06	0.0268758	0.000155223	1.46722	5.56635e-05	61.395	9.34202	1.11224
215			ap10a22	0.0634737	0.00649713	0.0102038	0.000391732	0.18753	0.0520362	0.00186211	62.4873	6.20332	65.4443	2.49976	287.002	81.8025			65.1889	4.88249	0.225243	0.635074	237.225	291.049	0.282962	2.88742e-05	0.00172591	3.70201e-05	0.0439441	0.0010818	1.46729	6.45807e-05	65.4443	8.07607	1.02043
216			ap10a23	0.0645207	0.00458576	0.00958806	0.000347574	0.25502	0.0508033	0.00139762	63.4865	4.37408	61.5142	2.21933	231.913	63.5161			61.766	4.29557	0.203291	0.652079	233.679	558.116									61.5142
217			ap10a24	0.0610018	0.00498077	0.009836	0.000322057	0.200507	0.0545292	0.00147504	60.1245	4.76662	63.0971	2.05589	392.969	60.6841			62.8033	4.00134	0.384821	0.535038	267.136	347.427	0.282903	4.35512e-05	0.00182006	5.50191e-05	0.0475171	0.0015181	1.46723	5.12943e-05	63.0971	5.93663	1.53944
218			ap10a27	0.0601333	0.00457616	0.00864882	0.000393663	0.299055	0.0529214	0.00170046	59.2929	4.38299	55.5141	2.51596	325.427	72.949			56.1144	4.8372	0.751746	0.385926	82.8757	242.868									55.5141
219			ap10a28	0.0787408	0.00583806	0.00999986	0.000546105	0.368284	0.0529559	0.00153606	76.9604	5.49518	64.1431	3.48556	326.906	65.8363			66.3911	6.71265	5.76879	0.0163133	330.669	448.09									64.1431
220			ap10a31	0.0549242	0.00633494	0.00932537	0.000405384	0.188448	0.0479075	0.00163942	54.2915	6.09749	59.8366	2.58913	94.7054	81.0284			59.2857	5.03265	0.814207	0.366878	384.515	463.146									59.8366
221			ap10a32	0.0549372	0.00490579	0.00976378	0.000372683	0.213722	0.0463511	0.00138135	54.304	4.72185	62.6361	2.37924	15.9198	71.6188			61.4458	4.55769	3.01637	0.0824276	404.711	542.968									62.6361
222			ap10a33	0.0620443	0.00384467	0.00991441	0.000383081	0.311771	0.0463101	0.000861838	61.1216	3.67575	63.5977	2.44525	13.7959	44.7413			63.0289	4.58195	0.442146	0.50609	1188.64	911.732									63.5977
223			ap10a36	0.0635409	0.00799923	0.00971024	0.000516811	0.211386	0.0621385	0.00230098	62.5515	7.63702	62.2943	3.29954	678.879	79.129			62.3187	6.43719	0.00112972	0.973195	123.56	154.63	0.28298	2.76485e-05	0.00156635	8.88053e-05	0.043946	0.0022151	1.46729	5.01294e-05	62.2943	8.6732	0.977045
224			ap10a37	0.0565997	0.00471896	0.0100078	0.000265313	0.158985	0.0516291	0.00118808	55.9028	4.53488	64.194	1.69337	269.017	52.7745			63.5331	3.30793	3.29769	0.0693776	628.673	1065.05									64.194
225			ap10a38	0.056119	0.0146659	0.00903899	0.000455819	0.0964814	0.0882966	0.00444615	55.4408	14.1002	58.0073	2.91207	1388.95	96.6516			57.9488	5.7886	0.0331181	0.855598	119.045	153.484									58.0073
226			ap10a39	0.0618543	0.00595692	0.0096825	0.000437954	0.234833	0.0526387	0.00185136	60.94	5.69622	62.1172	2.79616	313.253	80.0228			61.9704	5.40727	0.0423087	0.837033	281.015	284.367	0.282976	3.12154e-05	0.0012072	1.25765e-05	0.035333	0.00036744	1.46725	5.14411e-05	62.1172	8.54558	1.10311
227			ap10a40	0.0595189	0.00468658	0.00952153	0.000355898	0.237349	0.0498591	0.000954723	58.7043	4.49135	61.0894	2.27263	188.43	44.5617			60.7687	4.37981	0.27809	0.597954	1041.76	1299.47	0.282942	4.41236e-05	0.00338663	0.000232002	0.101447	0.00679103	1.46727	4.53393e-05	61.0894	7.21097	1.55946
228			ap10a41	0.0590037	0.00585249	0.00941023	0.000423307	0.226759	0.0533162	0.00173057	58.2105	5.61142	60.3786	2.70337	342.275	73.4709			60.1147	5.22944	0.147525	0.700911	220.803	241.679									60.3786
229	LB09-11.4A		ap08b22	0.0411218	0.00299037	0.00626336	0.000188169	0.206566	0.0497009	0.00111609	40.9187	2.91644	40.2503	1.20546	181.031	52.3302			40.3073	2.35893	0.0525032	0.818764	3108.95	1734.44	0.282737	3.54955e-05	0.000655104	6.78753e-05	0.0223041	0.00294306	1.46727	4.74825e-05	40.2503	-0.378818	1.25543
230			ap08b23	0.0423761	0.00298364	0.00638571	0.000206224	0.229337	0.0489134	0.0009254	42.1412	2.90638	41.0341	1.32097	143.683	44.3919			41.1473	2.57418	0.145265	0.703102	456.505	2371.08	0.282621	2.87012e-05	0.000777876	1.49653e-05	0.022935	0.000548793	1.46724	3.7843e-05	41.0341	-4.44794	1.01554
231			ap08b24	0.0411497	0.00329085	0.00609472	0.000259299	0.265997	0.0465812	0.00142737	40.9459	3.20941	39.1699	1.66142	27.8107	73.4739			39.4021	3.21562	0.308117	0.578835	62.7746	699.219	0.282736	2.84566e-05	0.000161176	7.30748e-06	0.0039106	0.000208094	1.46725	4.30837e-05	39.1699	-0.414294	1.00647
232			ap08b25	0.0382052	0.00259293	0.00591014	0.000173472	0.216238	0.0490722	0.0010308	38.0702	2.53593	37.9871	1.1117	151.283	49.2188			37.9952	2.16801	0.00107144	0.973875	792.937	2894.62	0.282685	2.68865e-05	0.000510263	6.07083e-06	0.0143668	0.000255308	1.46727	4.60206e-05	37.9871	-2.24975	0.95111
233			ap08b26	0.0402702	0.00229926	0.00623548	0.000177092	0.248711	0.0471564	0.000699109	40.0878	2.24426	40.0717	1.13453	57.1559	35.3516			40.0738	2.19328	5.15314e-05	0.994298	816.286	3908.12	0.282618	4.75667e-05	0.002774	0.000225839	0.0934106	0.0084042	1.4672	5.31412e-05	40.0717	-4.6571	1.68308
234			ap08b27	0.041705	0.00177396	0.00608611	0.000138142	0.266807	0.0488046	0.000610667	41.4873	1.72914	39.1147	0.88513	138.453	29.3878			39.4142	1.71603	1.90051	0.168021	6227.77	6386.49									39.1147
235			ap08b28	0.0418151	0.00229162	0.00636563	0.000181918	0.260733	0.0457503	0.000780326	41.5946	2.23347	40.9054	1.1653	-15.5247	41.2345			40.9991	2.24998	0.095166	0.757709	448.754	3304.71	0.28263	2.66888e-05	0.000741153	1.79458e-05	0.0209375	0.000566601	1.46725	4.91757e-05	40.9054	-4.14248	0.944301
236			ap08b35	0.0409881	0.00215818	0.0062737	0.000166443	0.251931	0.0495595	0.000794153	40.7883	2.10509	40.3165	1.06627	174.384	37.3873			40.3772	2.06246	0.0501296	0.822841	993.617	3556.97	0.282685	2.39674e-05	0.000512537	5.73835e-06	0.0131285	0.000153736	1.46729	4.53712e-05	40.3165	-2.18995	0.847847
237			ap08b36	0.0382972	0.00196004	0.00621446	0.000144696	0.227471	0.0486235	0.00076759	38.1602	1.91679	39.937	0.927013	129.716	37.1371			39.7192	1.79274	0.84868	0.356927	999.797	3601.3	0.28265	2.60175e-05	0.000481534	1.85038e-05	0.013201	0.000614776	1.46725	4.21592e-05	39.937	-3.44224	0.920484
238	LB09-11.5A		ap10a88	0.0317917	0.00199537	0.00437602	0.00019952	0.363218	0.0469698	0.000893258	31.7782	1.96364	28.1481	1.28058	47.6927	45.4293			28.8616	2.44741	3.58343	0.0583589	52.6878	2693.18	0.282616	3.4941e-05	0.00037362	1.08799e-05	0.0111783	0.000432588	1.46725	4.16219e-05	28.1481	-4.89119	1.23634
239			ap10a89	0.0331502	0.00308064	0.00436265	0.000358597	0.442253	0.0492881	0.00107312	33.1143	3.02766	28.0623	2.30162	161.557	50.9189			29.3978	4.34225	3.06673	0.0799093	90.6334	2304.79									28.0623
240			ap10a90	0.0271466	0.00406111	0.00485231	0.000323811	0.22304	0.0451598	0.0019105	27.1967	4.0146	31.2043	2.07734	-47.0268	102.894			30.6114	3.97558	0.963797	0.326232	67.0333	297.766									31.2043
241			ap10a91	0.0358232	0.00880725	0.00486215	0.000482491	0.201816	0.0580392	0.00265628	35.7379	8.63345	31.2675	3.09529	531.243	100.247			31.5199	6.11404	0.271459	0.602356	262.798	1155.29									31.2675
242			ap10a92	0.0277878	0.00489606	0.00427875	0.000342908	0.227425	0.0495228	0.00109737	27.8304	4.83697	27.5238	2.20111	172.656	51.7172			27.5555	4.28676	0.00401704	0.949466	130.929	3100.39	0.282566	2.02654e-05	0.000349385	1.62414e-05	0.0106737	0.000473198	1.46726	3.58896e-05	27.5238	-6.67104	0.717191
243			ap10a93	0.0303233	0.00310788	0.00424153	0.00027524	0.316572	0.049434	0.00156216	30.3322	3.06281	27.2848	1.76682	168.468	73.8107			27.7547	3.4088	1.02098	0.312285	584.26	963.843	0.282478	3.91685e-05	0.00029351	8.86892e-06	0.00957159	0.000321559	1.46728	5.7489e-05	27.2848	-9.80029	1.3866
244			ap10a97	0.033872	0.00260528	0.00489168	0.000312565	0.415375	0.0465447	0.000587062	33.8234	2.55869	31.4569	2.00512	25.9271	30.2535			32.1634	3.71869	0.887253	0.346219	1158.2	7957.97	0.282694	2.58301e-05	0.000769743	1.3669e-05	0.0251207	0.000239201	1.4673	3.66848e-05	31.4569	-2.09441	0.913713
245			ap10a102	0.0323639	0.00188063	0.00479986	0.000167596	0.300443	0.0465883	0.00075366	32.3412	1.8497	30.8679	1.07523	28.177	38.786			31.1105	2.06324	0.641132	0.423304	294.102	3670.39									30.8679
246			ap10a105	0.0322394	0.00526417	0.00489863	0.000356137	0.222623	0.0494339	0.000899983	32.2188	5.1782	31.5015	2.28461	168.463	42.5235			31.5707	4.45878	0.0192111	0.889762	807.623	4028.31									31.5015
247			ap10a107	0.0331479	0.00247304	0.00483511	0.000186216	0.25811	0.049055	0.001024	33.112	2.43052	31.094	1.19465	150.458	48.9188			31.3274	2.32288	0.696697	0.403896	96.8334	2138.43	0.282523	2.39518e-05	0.000474241	3.93454e-06	0.0100411	0.000116285	1.46724	3.94937e-05	31.094	-8.13527	0.847781
248			ap10a108	0.0324557	0.00138143	0.00448667	0.00013317	0.348671	0.0465986	0.000670978	32.4315	1.35858	28.8582	0.854634	28.7037	34.5199			29.5119	1.63829	7.2114	0.00724417	612.601	4789.97	0.282563	3.40023e-05	0.000619315	2.16707e-05	0.0200238	0.000888802	1.46725	4.482e-05	28.8582	-6.75919	1.20335
249			ap10a109	0.0282781	0.00326895	0.0047038	0.000275882	0.25368	0.0453433	0.00186047	28.3146	3.22796	30.2516	1.77012	-37.1732	99.6053			29.9444	3.38585	0.352611	0.552636	234.423	363.606									30.2516
250			ap10a110	0.0280235	0.00640857	0.00455006	0.00025561	0.122826	0.0638377	0.00245622	28.0632	6.32977	29.265	1.6403	736.258	81.4513			29.2226	3.24998	0.0359657	0.849588	420.188	1396.09	0.282309	3.91989e-05	0.000228123	1.97077e-05	0.0077558	0.000703855	1.46732	6.07545e-05	29.265	-15.7493	1.38851
251			ap07A13	0.178885	0.0303638	0.0143817	0.00121094	0.248028	0.0639823	0.00296585	167.101	26.1525	92.0503	7.69554	947.829	78.567			78.4792	12.0403	0.000322851	0.985684	80.0324	154.155									92.0503
252	LB09-21.3A		ap07A16	0.0976046	0.0090036	0.0160107	0.000731528	0.247654	0.0457337	0.0027176	94.5628	8.32914	102.394	4.64142	-16.4048	143.682			101.07	8.83433	0.859048	0.354007	111.621	121.999									102.394
253			ap07A17	0.0937608	0.0164547	0.0141861	0.00160809	0.322962	0.0493935	0.00274629	91.0007	15.2755	90.8066	10.2214	166.55	129.912			90.8508	19.1994	0.00015892	0.989947	71.2113	124.765									90.8066
254			ap07A21	0.101489	0.0124806	0.014761	0.000999338	0.275264	0.0517317	0.00110609	98.1498	11.5049	94.4603	6.34844	273.567	48.9946			95.0189	12.2069	0.1025	0.748847	231.018	985.648	0.283005	3.97404e-05	0.000712058	8.5223e-06	0.0184655	0.000256505	1.46725	4.4871e-05	94.4603	10.2733	1.40423
255			ap07A22	0.0955552	0.00842154	0.0150233	0.000734408	0.277335	0.043927	0.00138529	92.6652	7.80526	96.1261	4.66423	-114.786	77.7107			95.4765	8.84593	0.192125	0.661154	187.646	274.735	0.282969	4.40472e-05	0.00101294	5.89928e-05	0.0291162	0.00204809	1.46726	5.60128e-05	96.1261	9.02636	1.55661
256			ap07A24	0.0996114	0.0388662	0.014935	0.00185272	0.158969	0.0704967	0.00429064	96.4176	35.8891	95.5654	11.7677	942.855	124.692			95.6124	23.1991	0.00056159	0.981109	79.1811	112.412									95.5654
257			ap07A25	0.102455	0.0364356	0.0140058	0.00111079	0.111507	0.0877738	0.00300872	99.0403	33.5579	89.6605	7.06169	1377.54	65.8976			89.8517	14.0561	0.0776442	0.780516	207.184	306.101									89.6605
258			ap07A26	0.0858149	0.014673	0.0173546	0.00172106	0.289998	0.0369559	0.00225122	83.5972	13.7212	110.915	10.9054	-559.752	164.209			101.276	19.1936	3.42299	0.0642945	58.6171	104.95									110.915
259			ap07A27	0.100902	0.0124693	0.0152348	0.00121521	0.322731	0.0397735	0.00192388	97.6088	11.5007	97.4693	7.71617	-365.642	125.279			97.5014	14.4837	0.000144648	0.990378	70.2496	81.4926	0.283009	4.61384e-05	0.00096096	6.82887e-06	0.0283452	0.000248647	1.46727	5.21288e-05	97.4693	10.4591	1.63028
260			ap10a78	0.0583885	0.0132009	0.0152184	0.0013429	0.19515	0.0372675	0.00201941	57.6204	12.6645	97.365	8.52713	106.215	186.669			106.153	95.7544	0.000657145	0.97953	78.7125	86.6304	0.282932	5.81531e-05	0.00118032	1.41466e-05	0.03274	0.000604034	1.46725	6.82504e-05	97.365	7.71656	2.05537
261			ap10a79	0.0965517	0.00991748	0.0143202	0.000809001	0.274998	0.0589374	0.00226155	93.5883	9.18337	91.6589	5.14153	564.783	83.5725			91.9638	9.86147	0.0438355	0.834162	88.9147	96.5614	0.282964	3.92461e-05	0.000845387	7.64041e-06	0.0251757	0.000249952	1.4673	4.66812e-05	91.6589	8.76704	1.38696
262			ap10a80	0.102258	0.00996938	0.0152144	0.000632211	0.21311	0.0539453	0.00194613	98.8583	9.18364	97.3399	4.01442	368.765	81.2772			97.4874	7.82663	0.027175	0.869061	219.188	247.314	0.282996	3.96752e-05	0.000828259	2.29194e-05	0.0237407	0.000616531	1.46725	6.27933e-05	97.3399	10.023	1.40197
263			ap10a81	0.106335	0.0119282	0.0171466	0.000926943	0.240962	0.0471134	0.00236051	102.608	10.9475	109.597	5.87473	54.9807	119.521			108.506	11.2309	0.397965	0.528144	44.8805	88.8175									109.597
264			ap10a82	0.110112	0.0103928	0.0156026	0.000553114	0.187799	0.0539104	0.00222911	106.068	9.50591	99.804	3.51082	367.309	93.1794			100.219	6.90695	0.432934	0.510554	193.937	337.17	0.282983	2.95543e-05	0.000840387	2.58128e-05	0.0211104	0.000622462	1.46722	5.93216e-05	99.804	9.5549	1.04439
265			ap10a83	0.106423	0.00623236	0.0161222	0.000590947	0.312951	0.0489089	0.000866807	102.688	5.71954	103.101	3.74905	143.467	41.5867			103.01	7.05299	0.00513406	0.942875	1013.66	1117.04									103.101
266			ap10a84	0.102627	0.00790546	0.0153527	0.000512148	0.216529	0.0525547	0.00162657	99.1983	7.27995	98.2176	3.2516	309.62	70.4647			98.3176	6.3302	0.0180232	0.893208	111.001	196.918	0.283	5.25359e-05	0.00052151	1.02802e-05	0.0151009	0.000542069	1.46725	7.50565e-05	98.2176	10.1939	1.85639
267	LB09-22.7		ap08a43	0.0763388	0.0176045	0.0124673	0.00161034	0.28005	0.0527715	0.0040074	74.6969	16.6075	79.8725	10.2531	318.984	172.602			78.8225	19.3332	0.0941049	0.759023	79.2439	110.851									79.8725
268			ap08a44	0.0749233	0.00607421	0.0115625	0.000515993	0.275226	0.0471819	0.00156906	73.3607	5.73776	74.109	3.28828	58.4451	79.2802			73.9827	6.2814	0.0167972	0.896878	171.492	292.457	0.283058	6.24699e-05	0.0028855	0.000201206	0.0866269	0.00691771	1.46725	7.67016e-05	74.109	11.5883	2.20697
269			ap08a45	0.0592723	0.00421086	0.011531	0.000401082	0.244804	0.0405381	0.0010923	58.468	4.03639	73.9083	2.55607	-316.57	69.0986			70.35	4.73479	13.5331	0.000234387	290.855	481.328									73.9083
270			ap08a46	0.0722475	0.0084111	0.0113711	0.000556082	0.210027	0.0534405	0.00202583	70.83	7.96504	72.8893	3.54443	347.546	85.7257			72.6755	6.89151	0.0662194	0.796923	126.686	221.964	0.282954	5.43048e-05	0.00238399	4.81313e-05	0.0703434	0.00094623	1.46716	5.79596e-05	72.8893	7.91694	1.91921
271			ap08a47	0.0580773	0.0114407	0.0110246	0.000546357	0.125787	0.0594982	0.00256303	57.3218	10.979	70.6805	3.48364	585.374	93.4955			69.8646	6.83668	1.46717	0.225791	109.702	274.401	0.282999	5.85533e-05	0.00159008	8.51644e-05	0.0468912	0.00268999	1.46724	7.42308e-05	70.6805	9.49934	2.06903
272			ap08a48	0.0978262	0.00860246	0.0110722	0.000855209	0.43918	0.0559811	0.00231632	94.7678	7.95645	70.9835	5.45266	451.62	91.8788			75.336	10.5498	10.1423	0.00144902	92.7019	159.145									70.9835
273			ap08a49	0.0780685	0.0109088	0.0118901	0.000544485	0.16386	0.0576511	0.00248284	76.3274	10.2745	76.1962	3.46873	516.527	94.5694			76.2039	6.83234	0.000162585	0.989842	263.998	360.466	0.282996	4.43059e-05	0.00233225	4.92164e-05	0.0688642	0.00188655	1.46727	6.83755e-05	76.1962	9.47813	1.5656
274			ap08a52	0.0705305	0.0052785	0.0110829	0.000431725	0.26025	0.0496196	0.000980893	69.2027	5.00658	71.0519	2.75257	177.214	46.0988			70.7612	5.27208	0.134433	0.713878	502.088	886.799	0.282931	5.64908e-05	0.00256559	0.000217994	0.0760764	0.00756016	1.46728	6.67805e-05	71.0519	7.05037	1.99663
275			ap08a53	0.0729008	0.00432436	0.0111172	0.000372939	0.282763	0.0481712	0.000927006	71.4484	4.09253	71.2706	2.37769	107.688	45.4565			71.3012	4.54106	0.00187038	0.965501	710.448	1025.06									71.2706
276			ap08a54	0.0821988	0.0199799	0.0118115	0.00111177	0.19362	0.06805	0.00385465	80.2101	18.7463	75.6958	7.08326	870.076	117.374			76.008	13.9265	0.057971	0.809733	42.2707	93.6428									75.6958
277			ap08a55	0.0740984	0.00733087	0.0114725	0.000690095	0.303999	0.0472458	0.00129082	72.5812	6.93013	73.5357	4.39818	61.6704	65.094			73.3385	8.309	0.0186654	0.89133	428.151	710.371	0.283009	5.14391e-05	0.00306193	3.26851e-05	0.0878464	0.00141862	1.46725	5.38852e-05	73.5357	9.83515	1.81758
278			ap08a56	0.0751371	0.0067148	0.011316	0.000407323	0.20139	0.0514686	0.00165744	73.5627	6.3416	72.538	2.59639	261.873	73.9482			72.6248	5.07982	0.0260152	0.871864	207.499	278.982									72.538
279			ap08a57	0.0742623	0.00689866	0.0110685	0.000625019	0.303934	0.0472138	0.00141462	72.7361	6.52055	70.96	3.98502	60.0536	71.4068			71.2917	7.58711	0.073963	0.785652	466.734	770.311	0.28296	5.21535e-05	0.00335502	6.76512e-05	0.0989192	0.00240536	1.46725	5.12701e-05	70.96	8.03533	1.84314
280			ap08a58	0.0724347	0.00453151	0.0113201	0.000326791	0.230725	0.047482	0.000961539	71.0072	4.29044	72.564	2.08305	73.5399	48.1402			72.3731	4.02967	0.13029	0.71813	725.999	1037.36									72.564
281			ap08a61	0.066607	0.00863513	0.0100548	0.000690657	0.264918	0.0514151	0.00188566	65.4745	8.22042	64.4935	4.40794	259.486	84.2539			64.6355	8.48724	0.0141829	0.905202	267.505	373.028									64.4935
282			ap08a62	0.06853	0.00847543	0.0107553	0.00067651	0.254297	0.0510633	0.00194214	67.3035	8.05387	68.9628	4.31466	243.69	87.6253			68.7154	8.2842	0.0418861	0.837837	116.125	220.51									68.9628
283			ap08a63	0.0710278	0.00535415	0.0105856	0.000433278	0.271494	0.0460253	0.00131268	69.6743	5.07598	67.8803	2.76384	-1.05536	68.7613			68.1459	5.31887	0.124649	0.724047	562.115	517.419									67.8803
284			ap08a64	0.0796341	0.00758229	0.0119272	0.00065245	0.287262	0.049965	0.00213744	77.8009	7.13106	76.4326	4.15639	193.365	99.4636			76.6666	7.94442	0.0366072	0.848267	147.061	186.34									76.4326
285			ap08a66	0.0721144	0.0124273	0.0110014	0.000984018	0.259519	0.053401	0.00190074	70.704	11.7697	70.5325	6.27436	345.875	80.5156			70.5573	12.0738	0.000210686	0.988443	114.174	276.186	0.283	5.66098e-05	0.00169883	6.00499e-05	0.0491102	0.00220176	1.46727	6.91903e-05	70.5325	9.54834	2.00034
286			ap08a67	0.0754237	0.00545504	0.0112558	0.00056418	0.346515	0.0457355	0.00108039	73.8333	5.15049	72.154	3.59646	-16.3077	57.1178			72.5639	6.73669	0.105813	0.744963	443.684	860.979									72.154
287	LB09-23.11A		ap08a12	0.0640413	0.0070638	0.0102697	0.000431435	0.190437	0.0517473	0.00203841	63.0291	6.74078	65.8648	2.75294	274.26	90.254			65.6138	5.37397	0.175417	0.675343	128.082	233.387	0.282997	4.5201e-05	0.00231513	4.76914e-05	0.0653274	0.00165885	1.46728	5.79954e-05	65.8648	9.29567	1.59723
288			ap08a13	0.0548777	0.00689198	0.00983645	0.000477011	0.193069	0.0496653	0.00170193	54.2467	6.63394	63.1	3.04506	179.358	79.8801			62.0374	5.8735	1.73506	0.187765	325.94	424.788									63.1
289			ap08a14	0.0623532	0.0109515	0.00947143	0.000482385	0.144988	0.0613161	0.00201449	61.4169	10.4673	60.7694	3.08048	650.34	70.5377			60.7978	6.09213	0.00381881	0.95073	890.247	336.691									60.7694
290			ap08a15	0.036649	0.00601289	0.0100218	0.000777971	0.236575	0.0389784	0.00183569	36.5471	5.88954	64.2828	4.96536	-418.221	123.288			53.2154	8.37834	17.0639	3.61418e-05	68.0018	94.8137									64.2828
291			ap08a16	0.0673651	0.00984318	0.0102407	0.000500126	0.167116	0.0613418	0.00202609	66.1959	9.36381	65.6803	3.19134	651.243	70.9035			65.7107	6.28602	0.00302469	0.956136	151.791	346.429	0.282969	4.25755e-05	0.00201847	2.51436e-05	0.0612388	0.00070193	1.46726	6.00592e-05	65.6803	8.31123	1.5046
292			ap08a21	0.0712536	0.00494484	0.0100603	0.000524039	0.375297	0.0470662	0.00133521	69.8883	4.68695	64.5291	3.34453	52.5877	67.7048			65.8454	6.28885	1.339	0.247215	256.575	423.529									64.5291
293			ap08a23	0.0622344	0.00744084	0.00956613	0.000478978	0.209391	0.0537502	0.00179414	61.3033	7.11266	61.3742	3.05843	360.599	75.31			61.3675	5.96687	9.8684e-05	0.992069	147.4	297.063									61.3742
294			ap08a25	0.0535414	0.0107169	0.00993516	0.000809989	0.203656	0.0485528	0.00251108	52.9596	10.3287	63.7301	5.17016	126.291	121.744			62.1725	9.88446	1.04696	0.306207	65.1127	125.575	0.283099	3.47992e-05	0.00154362	3.85843e-05	0.0390714	0.00107817	1.46727	6.94339e-05	63.7301	12.906	1.22922
295			ap08a26	0.0624079	0.00647862	0.00930105	0.000572119	0.296266	0.0509114	0.00181571	61.4692	6.19186	59.6813	3.65413	236.82	82.2682			59.9908	6.98655	0.0833944	0.772749	217.983	267.584	0.283042	3.61292e-05	0.00210436	8.22453e-05	0.0555384	0.00231877	1.46722	5.30424e-05	59.6813	10.761	1.27646
296			ap08a27	0.066427	0.00757332	0.00986954	0.000646232	0.287157	0.052897	0.00181895	65.3032	7.21083	63.3113	4.12516	324.382	78.0829			63.6351	7.90969	0.0763025	0.782375	134.474	270.711	0.283005	2.90836e-05	0.00228335	3.74067e-05	0.0582566	0.000885752	1.46726	5.64735e-05	63.3113	9.55026	1.02767
297			ap08a30	0.0680249	0.00916074	0.0103982	0.000613563	0.219082	0.0640008	0.00485619	66.8235	8.70922	66.6851	3.91457	741.658	160.486			66.6994	7.61969	0.000251054	0.987334	52.5861	92.0293									66.6851
298			ap08a34	0.0584074	0.00707024	0.0107125	0.000558472	0.215334	0.0497222	0.00183413	57.6385	6.78283	68.6902	3.56198	182.028	85.9443			66.9452	6.78222	2.54887	0.110372	130.321	245.317									68.6902
299			ap08a35	0.0627901	0.00581363	0.00979307	0.00036172	0.199465	0.0507377	0.00138187	61.8344	5.55431	62.8231	2.30918	228.931	62.9154			62.7346	4.50952	0.0314903	0.859151	407.04	586.156									62.8231
300			ap08a36	0.063014	0.00458267	0.00979985	0.000303815	0.213146	0.0472983	0.0013119	62.0483	4.37733	62.8664	1.93951	64.3122	66.0509			62.7835	3.77563	0.0346914	0.852244	726.108	811.387	0.283025	3.77377e-05	0.00272068	5.36997e-05	0.0681058	0.00185672	1.46725	5.6064e-05	62.8664	10.207	1.33337
301			ap08a37	0.0512069	0.00460111	0.00931835	0.000308712	0.184353	0.0497471	0.00128014	50.7071	4.44431	59.7918	1.97171	183.194	59.9424			58.7635	3.81011	4.07247	0.0435877	197.569	539.866									59.7918
302			ap08a39	0.0631775	0.00543385	0.00973784	0.000448118	0.267519	0.048932	0.0012627	62.2045	5.18957	62.4705	2.86089	144.574	60.5396			62.4292	5.48857	0.00260369	0.959306	536.009	689.658	0.283009	3.26174e-05	0.00242663	3.01216e-05	0.0623502	0.000913597	1.46724	4.88678e-05	62.4705	9.63619	1.15252
303			ap08a40	0.0574853	0.00455155	0.00942885	0.000331261	0.22186	0.0489389	0.00149432	56.7536	4.37034	60.4975	2.1155	144.906	71.63			60.0281	4.08447	0.721856	0.395537	268.219	414.392	0.282995	2.74012e-05	0.00199532	3.22808e-05	0.0490653	0.00082118	1.46725	3.72357e-05	60.4975	9.13955	0.968255
304	LB09-24.5		ap07A86	0.0751224	0.0232383	0.00749513	0.00103423	0.223035	0.0897723	0.00510347	73.5488	21.947	48.1366	6.61747	1420.69	108.643			48.7003	13.1987	1.36881	0.242016	77.6502	105.14									48.1366
305			ap07A87	0.0590366	0.0166735	0.00932649	0.0014205	0.269642	0.0366385	0.00180877	58.242	15.9862	59.8438	9.07252	-583.061	133.73			59.5765	17.3314	0.00989232	0.920779	130.319	162.766									59.8438
306			ap07A90	0.0393748	0.00535165	0.00796898	0.00046936	0.216672	0.0494881	0.00195885	39.2135	5.22812	51.1678	3.00177	171.023	92.4091			48.8567	5.62882	4.8742	0.027261	146.598	184.058									51.1678
307			ap07A91	0.0482998	0.00622838	0.00717114	0.000679625	0.36747	0.0581076	0.00301218	47.8953	6.03281	46.0632	4.34995	533.82	113.495			46.5335	8.1344	0.0930691	0.760313	82.9519	78.5882	0.28305	3.47718e-05	0.000774415	2.46316e-05	0.0233737	0.000670675	1.46729	5.46849e-05	46.0632	10.8291	1.22847
308			ap07A94	0.0540553	0.0119511	0.00805216	0.000533286	0.149777	0.081714	0.00411323	53.4547	11.5127	51.6997	3.41032	1238.67	98.6803			51.7756	6.74744	0.0232261	0.878871	116.548	159.555									51.6997
309			ap07A95	0.049913	0.0045833	0.00827755	0.000332916	0.218997	0.0517649	0.0118883	49.4566	4.43257	53.1409	2.12849	275.037	526.124			52.6848	4.11083	0.679034	0.409923	200.743	505.3									53.1409
310			ap07A96	0.0423411	0.00385217	0.00739638	0.000441526	0.328067	0.0429812	0.00157395	42.1072	3.75255	47.5047	2.82536	-168.702	91.1903			45.8837	5.14868	1.93327	0.164398	131.693	175.423									47.5047
311			ap07A97	0.0546034	0.00604327	0.00840426	0.000535681	0.287955	0.0533592	0.00186873	53.9826	5.81852	53.951	3.42444	344.101	79.2467			53.9565	6.53457	2.93583e-05	0.995713	165.86	211.615	0.283024	2.25814e-05	0.000587789	3.2612e-05	0.0173676	0.00112331	1.46722	3.85049e-05	53.951	10.0583	0.797862
312			ap07A99	0.0555158	0.00623075	0.00776227	0.000837125	0.48045	0.0605252	0.00298644	54.8607	5.99385	49.8456	5.35489	622.404	106.43			51.801	9.69906	0.743751	0.38846	29.8499	37.9247	0.283001	2.84813e-05	0.000817124	2.7929e-05	0.0214142	0.000820851	1.46725	5.28738e-05	49.8456	9.17185	1.0064
313			ap07c104	0.0526966	0.0058767	0.00776505	0.000732765	0.423096	0.0475252	0.00171899	52.1451	5.6684	49.8634	4.68731	75.6977	85.9497			50.6351	8.56634	0.164494	0.685055	225.497	238.467									49.8634
314			ap07c105	0.0449226	0.00428591	0.00809536	0.000463005	0.299738	0.0317829	0.0016902	44.6188	4.16475	51.9759	2.96075	-984.988	157.129			49.963	5.4314	2.90238	0.0884507	276.063	221.978									51.9759
315			ap08a03	0.0496666	0.00759799	0.00796023	0.000644969	0.264819	0.0498239	0.00201507	49.2182	7.34982	51.1118	4.1249	186.784	94.1483			50.8012	7.88399	0.0653045	0.798301	164.987	194.219	0.283	3.27939e-05	0.00104242	2.50292e-05	0.0255191	0.000717237	1.46725	4.57198e-05	51.1118	9.14325	1.15879
316			ap08a04	0.0596128	0.00770538	0.00799655	0.000518747	0.250939	0.0639322	0.00225257	58.7942	7.38375	51.3441	3.31753	739.387	74.5498			52.0121	6.5033	1.03641	0.308656	210.077	226.903	0.282997	2.28422e-05	0.00132767	1.79152e-05	0.0327875	0.000559771	1.46726	4.43481e-05	51.3441	9.05563	0.807152
317			ap08a05	0.052753	0.0143455	0.00791064	0.0005482	0.127417	0.0908796	0.0046847	52.1995	13.8363	50.7946	3.50619	1444.08	98.1994			50.8393	6.95673	0.0102991	0.919165	274.746	227.204									50.7946
318			ap08a06	0.0579276	0.0056698	0.0082432	0.000282392	0.175002	0.0581732	0.00191986	57.1781	5.44179	52.9213	1.80553	536.291	72.2259			53.1418	3.56675	0.613322	0.433544	430.813	364.72	0.283021	2.99359e-05	0.00228659	0.000190223	0.0522766	0.00405978	1.46724	5.1659e-05	52.9213	9.89387	1.05773
319	LB09-30		ap07A49	0.0443788	0.00848518	0.00726654	0.00120358	0.433145	0.044896	0.00279539	44.0902	8.24961	46.6738	7.70283	-61.2924	151.851			45.5347	13.4609	0.0923347	0.76123	115.033	105.709	0.282987	3.74403e-05	0.000692261	5.3616e-05	0.0185835	0.00151608	1.4673	7.1049e-05	46.6738	8.61828	1.32304
320			ap07A50	0.0327031	0.00596613	0.00746713	0.000656668	0.241024	0.0357327	0.00273562	32.6748	5.86607	47.9574	4.20178	-651.36	210.394			43.423	7.52744	5.8547	0.0155354	151.919	151.188	0.283023	5.21599e-05	0.00172279	0.000139947	0.0473575	0.003761	1.46725	6.13745e-05	47.9574	9.8789	1.84296
321			ap07A51	0.0505017	0.0175575	0.0073196	0.00109494	0.215137	0.0628553	0.00324427	50.0258	16.9705	47.0133	7.00712	703.339	109.854			47.2594	13.738	0.0316581	0.858781	115.652	128.708	0.283005	4.2183e-05	0.00069669	1.30062e-05	0.01827	0.000376747	1.4673	6.47607e-05	47.0133	9.26769	1.49054
322			ap07A61	0.0476467	0.0069707	0.00883898	0.000564833	0.218396	0.0503643	0.00247559	47.2624	6.75603	56.7294	3.60925	211.84	113.901			55.1872	6.86047	1.87859	0.170496	77.0997	104.272									56.7294
323			ap07A62	0.0581318	0.00659085	0.00941643	0.00050033	0.234322	0.0550796	0.0021855	57.3742	6.32458	60.4182	3.19525	415.454	88.665			60.0068	6.15416	0.227957	0.633046	162.485	160.527									60.4182
324			ap07A63	0.0572966	0.00742469	0.00876579	0.000575299	0.253235	0.0631259	0.00307396	56.5724	7.13036	56.2617	3.67639	712.476	103.486			56.3035	7.09665	0.00188909	0.965337	74.2805	84.424	0.283065	4.87868e-05	0.000473892	1.31688e-05	0.0121413	0.000441764	1.4672	5.94407e-05	56.2617	11.5652	1.72352
325			ap07A64	0.0429943	0.00754189	0.00814832	0.00038148	0.133446	0.0540005	0.00205234	42.7433	7.34223	52.3146	2.4393	371.071	85.5904			51.6844	4.78101	1.67701	0.195324	844.709	491.887									52.3146
326			ap07A67	0.0491997	0.00555447	0.00839737	0.000357593	0.188597	0.0468686	0.00153989	48.7665	5.37545	53.9069	2.286	42.5385	78.5611			53.3948	4.44305	0.899823	0.342826	208.727	385.709									53.9069
327			ap07A68	0.0568657	0.012726	0.00864683	0.000840649	0.217214	0.044169	0.0051179	56.1584	12.2265	55.5014	5.37272	-101.266	284.778			55.5653	10.4779	0.00287962	0.957202	121.795	123.056	0.282962	6.06002e-05	0.000745754	1.02503e-05	0.0187051	0.000361548	1.46726	7.33947e-05	55.5014	7.91699	2.14164
328			ap07A69	0.0496015	0.00534243	0.00799617	0.000521634	0.302838	0.0500961	0.00194955	49.1553	5.16826	51.3416	3.33599	199.454	90.3822			50.8685	6.27661	0.1747	0.675966	145.465	154.855	0.282961	4.42884e-05	0.000830824	5.84116e-06	0.0217651	0.000211167	1.46723	5.89187e-05	51.3416	7.79137	1.56518
329			ap07A70	0.0546509	0.00899986	0.00780212	0.000865667	0.336876	0.0619023	0.00379216	54.0284	8.66477	50.1005	5.53725	670.736	131.083			50.8704	10.5502	0.209632	0.647056	66.1114	97.4408									50.1005
330			ap07A71	0.050462	0.00417669	0.00836197	0.000393577	0.284331	0.0465012	0.00147063	49.9874	4.03721	53.6806	2.51612	23.6866	75.8902			52.9216	4.74217	0.811163	0.367775	235.208	246.307									53.6806
331			ap07A72	0.0469223	0.00369364	0.00835248	0.000306102	0.23278	0.0464677	0.00153302	46.5601	3.58237	53.6199	1.95691	21.9543	79.1925			52.4481	3.72209	3.73764	0.0531995	490.876	287.889									53.6199
332			ap07A73	0.0505157	0.00483263	0.00771203	0.000411774	0.279064	0.0496171	0.00164153	50.0393	4.67101	49.5242	2.63415	177.095	77.1521			49.6066	5.05103	0.0121174	0.912348	248.165	249.855	0.283014	3.80408e-05	0.000691111	2.88911e-05	0.0178407	0.000821398	1.46727	5.08662e-05	49.5242	9.61699	1.34413
333			ap07A76	0.0500325	0.00369342	0.00815419	0.000235091	0.195276	0.0475663	0.00110743	49.5721	3.57154	52.3521	1.50324	77.7539	55.3025			52.09	2.92937	0.599572	0.438742	1641.32	911.583									52.3521
334			ap07A78	0.055115	0.00654952	0.00868618	0.00048366	0.234284	0.0451481	0.00184111	54.475	6.30289	55.7529	3.09103	-47.6546	99.1938			55.5937	5.97737	0.0407105	0.840097	185.156	172.54	0.282962	5.23449e-05	0.00112351	3.28927e-05	0.0297475	0.00091548	1.46723	6.3164e-05	55.7529	7.88788	1.84989
335			ap07A79	0.0483182	0.00524264	0.00829128	0.000444426	0.247006	0.0473884	0.00213372	47.913	5.07793	53.2286	2.8414	68.8435	107.132			52.3237	5.40506	1.06084	0.30302	136.836	188.767									53.2286
336			ap07A80	0.0516698	0.0188446	0.00814306	0.000618774	0.104175	0.100772	0.00459429	51.1542	18.1944	52.281	3.95666	1638.37	84.6482			52.2532	7.86229	0.00383181	0.950644	125.274	165.493									52.281
337			ap07A81	0.0507394	0.00570213	0.00865426	0.000493289	0.2536	0.0416722	0.00299517	50.2555	5.51026	55.5489	3.15266	-246.314	181.746			54.6103	5.98512	0.892918	0.344693	358.579	398.895									55.5489
338	LB09-48		ap08b77	0.0597338	0.00738774	0.0083609	0.000522765	0.252774	0.0598806	0.00222911	58.9103	7.07856	53.6738	3.34202	599.264	80.6071			54.2183	6.52125	0.553745	0.456794	182.894	214.612	0.283003	2.8297e-05	0.00109107	9.69226e-06	0.0268491	0.000320848	1.46725	4.52793e-05	53.6738	9.31963	0.999884
339			ap08b78	0.0506858	0.00546662	0.00804629	0.000407484	0.234775	0.0533798	0.00253953	50.2037	5.28295	51.6622	2.60584	344.977	107.635			51.4778	5.03598	0.0754195	0.783602	172.059	206.344	0.283004	2.8329e-05	0.000970726	1.16402e-05	0.023354	0.000273714	1.46724	4.59751e-05	51.6622	9.28787	1.00101
340			ap08b79	0.0561483	0.00798602	0.00829331	0.000648888	0.275054	0.058419	0.00267813	55.4689	7.67778	53.2417	4.14859	545.513	100.171			53.5612	8.00012	0.0844644	0.771335	169.656	192.961	0.282958	2.803e-05	0.00170602	7.86432e-05	0.0485351	0.00237022	1.46724	5.38776e-05	53.2417	7.6825	0.990607
341			ap08b80	0.0548756	0.00971212	0.00846294	0.000970733	0.324051	0.0511879	0.0022256	54.2446	9.34851	54.3261	6.20523	249.3	100.069			54.3079	11.6801	7.51729e-05	0.993119	204.804	204.047	0.282971	3.02304e-05	0.00117285	1.88031e-05	0.0334612	0.000384669	1.46722	4.47359e-05	54.3261	8.19348	1.06832
342			ap08b82	0.0451645	0.00607191	0.00800167	0.000546061	0.253806	0.0647481	0.00304174	44.8538	5.89889	51.3768	3.49219	766.161	98.9692			50.1197	6.58747	1.16946	0.27951	195.252	154.31									51.3768
343			ap08b83	0.0517994	0.0132205	0.00827711	0.00133335	0.315583	0.0519328	0.00346629	51.2793	12.7627	53.1381	8.52479	282.453	152.702			52.7098	15.9788	0.0207256	0.88553	132.798	163.086									53.1381
344			ap08b86	0.0561156	0.0058677	0.00803705	0.000531231	0.316062	0.0522549	0.00210405	55.4375	5.64139	51.603	3.39723	296.581	91.8863			52.2708	6.50804	0.469274	0.493318	107.605	166.639	0.282995	3.63866e-05	0.00116895	2.04554e-05	0.0323995	0.000699624	1.46728	5.56017e-05	51.603	8.96312	1.28577
345			ap08b87	0.0975764	0.0373158	0.00795577	0.00159572	0.262239	0.148094	0.016224	94.5367	34.5213	51.0833	10.2055	2324.04	187.761			51.3677	20.4052	1.62964	0.20176	34.7432	39.8151									51.0833
346			ap08b89	0.0592651	0.00498104	0.00904008	0.00032809	0.215909	0.0493236	0.00187664	58.461	4.77469	58.0143	2.09606	163.242	88.9535			58.0579	4.08694	0.00872433	0.925584	785.36	480.126	0.283066	7.32251e-05	0.0055421	4.53345e-05	0.17553	0.000420392	1.4673	6.5591e-05	58.0143	11.4485	2.58686
347			ap08b90	0.048154	0.00553806	0.00773491	0.000473844	0.266333	0.0517522	0.00212651	47.754	5.36491	49.6706	3.03115	274.475	94.1424			49.3519	5.78941	0.125491	0.723155	98.9917	141.464									49.6706
348			ap08b95	0.0543254	0.0126374	0.00804454	0.000998981	0.266914	0.0642731	0.0034352	53.7149	12.1706	51.6509	6.38845	750.631	112.88			51.9306	12.3448	0.0288511	0.865126	103.221	82.3665									51.6509
349			ap08b96	0.0600334	0.00686187	0.0089162	0.000590232	0.289576	0.0527181	0.00217602	59.1973	6.57284	57.2228	3.77125	316.685	93.8564			57.5445	7.23215	0.0903969	0.763675	145.231	175.062									57.2228
350			ap08b97	0.0544732	0.00461053	0.00790745	0.000474216	0.354276	0.0435264	0.0017863	53.8573	4.43961	50.7742	3.03301	-137.411	101.574			51.4753	5.72499	0.489894	0.483975	270.342	297.124	0.282981	4.73079e-05	0.00163039	9.58658e-05	0.0488589	0.00314272	1.46725	7.04274e-05	50.7742	8.4639	1.67177
351	PK06-11		au25a72	0.108934	0.00921771	0.0159493	0.00060851	0.225443	0.0552132	0.00133326	104.99	8.44009	102.004	3.86113	420.866	53.9079			102.318	7.5139	0.124441	0.724268	311.721	544.599	0.283034	3.10934e-05	0.00178953	5.8862e-05	0.0504517	0.00189095	1.46725	4.71932e-05	102.004	11.3936	1.09858
352			au25a73	0.10163	0.00685161	0.01617	0.000569584	0.261246	0.0463293	0.00140525	98.2802	6.31519	103.405	3.61335	14.7923	72.9079			102.51	6.87447	0.642408	0.422837	177.196	312.882	0.283067	2.85903e-05	0.00150771	8.78073e-05	0.0423928	0.00287014	1.46723	4.58224e-05	103.405	12.594	1.01002
353			au25a74	0.0953636	0.00646493	0.0155205	0.000618681	0.294002	0.0490141	0.00132941	92.4875	5.99288	99.2831	3.92732	148.506	63.5847			97.7255	7.33989	1.23633	0.266184	193.602	350.499									99.2831
354			au25a75	0.101163	0.0124172	0.0151409	0.000707018	0.190215	0.0643334	0.00213159	97.8495	11.45	96.8732	4.48975	752.612	69.9557			96.95	8.79594	0.00723063	0.932233	133.146	282.566	0.283077	3.33943e-05	0.00228111	6.89553e-05	0.063696	0.00186125	1.46729	4.02169e-05	96.8732	12.7766	1.17969
355			au25a76	0.0701617	0.00654581	0.0162624	0.000793518	0.261504	0.0396151	0.0013459	68.8529	6.21075	103.991	5.03349	-375.993	88.1777			90.8777	8.69224	26.3036	2.91738e-07	104.004	201.838									103.991
356			au25a77	0.103405	0.00945168	0.0162249	0.000666724	0.224785	0.0545019	0.00170404	99.9146	8.69769	103.753	4.22936	391.844	70.1544			103.27	8.16683	0.191901	0.66134	186.356	265.132	0.28307	2.99342e-05	0.0023844	7.42551e-05	0.0629304	0.00147797	1.46726	4.68551e-05	103.753	12.6567	1.05748
357			au25a78	0.0911675	0.00935455	0.0153487	0.000768633	0.244026	0.0471017	0.00137815	88.5904	8.70485	98.1922	4.88003	54.3883	69.8056			96.5279	9.26767	1.17671	0.278023	223.276	349.806	0.283041	3.15774e-05	0.00174317	6.21618e-05	0.0480995	0.00201334	1.46728	5.15487e-05	98.1922	11.5465	1.11565
358			au25a79	0.0944818	0.00655765	0.016001	0.000676758	0.304688	0.042284	0.00119025	91.6698	6.08373	102.333	4.29396	-209.59	70.6631			99.4635	7.901	2.89216	0.0890166	190.268	344.582									102.333
359			au25a82	0.112235	0.0141474	0.016857	0.000878034	0.206612	0.0549671	0.00152814	108.008	12.9155	107.761	5.56634	410.885	62.1723			107.785	10.8512	0.000362634	0.984821	162.164	295.134	0.28305	3.09628e-05	0.00186697	9.27272e-05	0.0589333	0.00341783	1.4673	4.14734e-05	107.761	12.0707	1.0939
360			au25a83	0.0185296	0.00118128	0.0157783	0.000476544	0.236877	0.0081063	0.00022173	18.6424	1.17763	100.919	3.02428	-14510.3	1498.19			23.4473	2.3181	756.92	1.2553e-166	321.397	421.895	0.283038	2.84746e-05	0.00163524	7.31884e-05	0.0543277	0.00289642	1.46728	3.66458e-05	100.919	11.4883	1.00604
361			au25a84	0.125126	0.00745164	0.0158978	0.000580574	0.306612	0.0560706	0.0012599	119.709	6.72482	101.677	3.68405	455.166	49.8648			104.05	7.1548	7.35858	0.00667439	535.761	698.946	0.283077	3.10992e-05	0.00255288	5.79144e-05	0.0834014	0.00168546	1.46721	4.55276e-05	101.677	12.7537	1.09861
362			au25a85	0.117743	0.014719	0.0166087	0.000915215	0.220401	0.0591337	0.00240902	113.023	13.3711	106.187	5.80347	572.021	88.6184			106.813	11.3436	0.260721	0.609628	139.291	192.855									106.187
363			au25a86	0.10087	0.0070799	0.0159432	0.000538295	0.240521	0.0508505	0.0012839	97.5795	6.53011	101.965	3.41562	234.06	58.2708			101.326	6.55606	0.442805	0.505775	218.613	436.215	0.283041	3.47828e-05	0.0024075	2.79365e-05	0.0800303	0.00129843	1.46722	4.57966e-05	101.965	11.5887	1.2289
364			au25a87	0.0810396	0.0118272	0.0155827	0.000888065	0.195248	0.0481351	0.00174367	79.1219	11.1089	99.6779	5.63699	105.915	85.5949			96.5	10.7193	3.27939	0.0701549	299.195	360.808									99.6779
365			au25a88	0.101008	0.00974316	0.0164773	0.000501429	0.157743	0.0515623	0.00166278	97.7065	8.98543	105.354	3.18002	266.05	73.9958			104.822	6.2356	0.719335	0.396363	293.003	455.305	0.283042	3.06451e-05	0.00244766	6.0754e-05	0.078824	0.00244195	1.46728	4.69534e-05	105.354	11.6793	1.08271
366	O1A-7		au27a97	0.0448888	0.0029365	0.00587275	0.000236878	0.308291	0.0490717	0.0012211	44.586	2.85358	37.7474	1.5181	151.257	58.3063			38.5859	2.95739	5.9828	0.0144461	2008.98	1463.25	0.282925	8.73352e-05	0.00628543	0.00039834	0.236352	0.0121063	1.4672	0.000101844	37.7474	6.06744	3.08687
367			au27a99	0.0471419	0.00664382	0.00631339	0.00037285	0.209523	0.0676634	0.00300889	46.7731	6.44232	40.5708	2.38846	858.262	92.3156			40.9424	4.71467	0.9387	0.33261	164.426	175.857	0.283033	6.47843e-05	0.000712764	7.83271e-06	0.0234941	0.000153558	1.46732	9.53348e-05	40.5708	10.103	2.28893
368			au27a98	0.0471997	0.00382295	0.00597161	0.000327961	0.339033	0.0486677	0.00210628	46.8292	3.7068	38.381	2.10162	131.855	101.772			39.5223	4.08845	5.50937	0.0189149	256.126	307.248									38.381
369			au27a111	0.0597339	0.00492308	0.00563774	0.000325996	0.350801	0.066235	0.00202245	58.9103	4.71704	36.2412	2.08972	813.811	63.8374			37.1712	4.16262	25.5575	4.2939e-07	1943.51	763.697	0.282947	2.83575e-05	0.00112428	7.94919e-05	0.0394998	0.0038502	1.46719	5.38074e-05	36.2412	6.97098	1.00222
370			au27a110	0.0404543	0.00336945	0.00571699	0.00020229	0.212414	0.049141	0.0011994	40.2675	3.28826	36.7491	1.29663	154.566	57.1543			37.0024	2.54997	1.15538	0.282427	1505.62	1106.79	0.282987	5.68765e-05	0.00160749	0.000122049	0.0570321	0.00578777	1.46727	6.89373e-05	36.7491	8.35925	2.00987
371			au27a109	0.0423299	0.00631787	0.00590278	0.000293828	0.166756	0.0597105	0.00242088	42.0963	6.15454	37.9399	1.88302	593.101	87.8818			38.1166	3.72959	0.458234	0.498452	455.272	450.903									37.9399
372			au27a107	0.0636141	0.0143821	0.00545378	0.000434452	0.176175	0.120688	0.00576491	62.6214	13.73	35.0618	2.78546	1966.42	85.1856			35.1829	5.56952	4.04516	0.0442981	160.051	197.659									35.0618
373			au27a106	0.0301776	0.0044024	0.00537063	0.000499376	0.31869	0.0420366	0.0020647	30.1886	4.33917	34.5287	3.20199	-224.346	123.659			33.2713	5.85236	0.933268	0.334011	258.783	243.131	0.282976	6.2356e-05	0.00124408	7.10838e-06	0.0419289	0.000380636	1.46723	0.000121307	34.5287	7.93229	2.20358
374			au27a105	0.0443819	0.00459245	0.00570079	0.000476817	0.404155	0.051012	0.0014734	44.0932	4.46493	36.6453	3.05633	241.374	66.5717			38.1822	5.85026	3.02634	0.081923	534.793	726.402	0.282863	5.25088e-05	0.00121965	6.56993e-05	0.0439752	0.00278689	1.46728	5.60612e-05	36.6453	3.98328	1.85633
375			au27a104	0.059691	0.00457316	0.00588316	0.000251335	0.278807	0.0635834	0.00204509	58.8692	4.38195	37.8142	1.61073	727.801	68.1827			38.4857	3.20961	24.346	8.04954e-07	371.686	392.828									37.8142
376			au27a101	0.0383554	0.00364995	0.00558776	0.000238203	0.223985	0.0480384	0.00147582	38.2171	3.5692	35.9208	1.52702	101.16	72.6565			36.1217	2.98981	0.416747	0.518564	905.608	623.182	0.28297	6.89348e-05	0.00110925	2.90686e-05	0.0368565	0.000675022	1.46729	8.78804e-05	35.9208	7.77121	2.43611
377	01B-22		au27a70	0.045113	0.0130618	0.00578969	0.00173959	0.51887	0.0496627	0.00262801	44.8038	12.6902	37.2151	11.1495	179.236	123.355			39.9688	20.5836	0.41454	0.519676	47.3987	317.641	0.282607	5.32939e-05	0.000696797	8.26773e-05	0.0271324	0.00301976	1.46726	5.22409e-05	37.2151	-5.02989	1.88579
378			au27a74	0.0451197	0.00188801	0.00616139	0.000131304	0.254644	0.0471651	0.000723343	44.8103	1.83429	39.597	0.841259	57.5971	36.5672			40.0902	1.6469	8.23529	0.00410836	484.375	2038.19	0.2827	4.09188e-05	0.000171954	8.25166e-06	0.00877649	0.000332569	1.46724	5.20766e-05	39.597	-1.69036	1.44743
379			au27a87	0.0474649	0.00298778	0.00632784	0.000220031	0.276199	0.0491937	0.00100974	47.0863	2.89627	40.6634	1.40949	157.072	48.0431			41.3326	2.75511	5.05488	0.0245565	239.561	1142.58	0.282695	3.7574e-05	0.000106731	2.49868e-06	0.00480762	0.000105111	1.46725	3.97412e-05	40.6634	-1.82357	1.32913
380	01b-24		au27a50	0.0439153	0.00174445	0.00640872	0.000116464	0.228742	0.0502066	0.000742651	43.6394	1.69677	41.1815	0.745993	204.571	34.3218			41.4099	1.45841	2.1109	0.146259	334.593	1392.41	0.283006	2.87011e-05	0.000903459	2.95125e-06	0.0260532	0.000101789	1.46723	4.06226e-05	41.1815	9.14697	1.01415
381			au27a55	0.0402198	0.0152147	0.00722082	0.00108907	0.19935	0.0759551	0.00724686	40.0387	14.8514	46.3812	6.97026	1093.89	191.041			45.5943	13.4321	0.177379	0.673638	19.0812	36.0082	0.283135	3.63275e-05	0.000385289	1.16999e-05	0.0109114	0.000463636	1.46724	4.09353e-05	46.3812	13.8595	1.28304
382			au27a58	0.0461993	0.00552668	0.00690043	0.000486046	0.294403	0.0602221	0.00260689	45.8587	5.36389	44.3302	3.11178	611.566	93.5407			44.5841	5.96381	0.0815224	0.775246	22.9473	52.6246	0.283108	2.52853e-05	0.000458321	2.18236e-05	0.0123505	0.000695479	1.46728	4.43804e-05	44.3302	12.8392	0.893135
383			au27a59	0.0391456	0.0024913	0.00630795	0.000183179	0.228148	0.0487016	0.00119207	38.9895	2.43433	40.5359	1.17345	133.491	57.5412			40.3484	2.27064	0.399053	0.527579	142.7	531.544	0.283075	2.48128e-05	0.000391957	1.45193e-05	0.0108246	0.000330722	1.46727	3.98168e-05	40.5359	11.597	0.876545
384			au27a64	0.0401221	0.00342913	0.00604376	0.000276447	0.267592	0.0497742	0.00132128	39.9432	3.34757	38.8433	1.77138	184.464	61.8208			38.9957	3.4194	0.108224	0.742176	64.6009	463.982	0.283075	2.48615e-05	0.000144676	1.41448e-06	0.00385646	3.14792e-05	1.46726	4.42909e-05	38.8433	11.5742	0.878266
385	PGUP-9		au26a87	0.066242	0.0150846	0.00904743	0.000779608	0.1892	0.0738473	0.00365272	65.127	14.3651	58.0612	4.98061	1037.3	99.8846			58.4447	9.83847	0.243107	0.621974	122.241	118.228									58.0612
386			au26a88	0.064205	0.00372166	0.00958178	0.000473435	0.426203	0.0438612	0.00165957	63.1853	3.55092	61.4741	3.02299	-118.482	93.3034			62.0926	5.47368	0.232292	0.629828	98.1296	106.637	0.283102	3.39604e-05	0.00297127	0.000253786	0.103119	0.00849784	1.46726	4.09899e-05	61.4741	12.8901	1.19958
387			au26a89	0.0916773	0.0268142	0.0105592	0.0023565	0.381507	0.059792	0.00292292	89.0646	24.9402	67.7121	15.0322	596.055	105.91			70.6901	29.3029	0.799016	0.371393	342.026	218.29									67.7121
388			au26a90	0.048299	0.00483652	0.00939842	0.00053153	0.282389	0.0442697	0.0019181	47.8944	4.68466	60.3032	3.39456	-95.6681	106.372			56.6834	6.15254	6.32582	0.0118991	79.4522	99.6275									60.3032
389			au26a91	0.0579192	0.00502377	0.00948806	0.00060035	0.364745	0.047516	0.0018017	57.1701	4.82178	60.8756	3.83373	75.2402	90.1105			59.6647	6.95534	0.562222	0.453369	87.9161	105.568	0.283054	3.58529e-05	0.00392711	4.84709e-05	0.126037	0.00129195	1.46724	5.31746e-05	60.8756	11.1612	1.26664
390			au26a93	0.0536438	0.0135964	0.00815333	0.000578828	0.140049	0.0949075	0.00442971	53.0583	13.1027	52.3466	3.70119	1526.24	87.9383			52.3752	7.32712	0.00294586	0.956719	83.8542	111.817	0.28303	2.42134e-05	0.00158401	1.57887e-05	0.0521043	0.000550196	1.46726	4.33929e-05	52.3466	10.208	0.855507
391			au26a96	0.0557727	0.00784276	0.00893178	0.000596037	0.237278	0.0576353	0.0022473	55.1078	7.54273	57.3224	3.80828	515.924	85.6302			57.0264	7.34147	0.0850384	0.770581	109.604	123.912	0.28302	3.05021e-05	0.001719	2.27619e-05	0.0551015	0.00107487	1.46725	4.5159e-05	57.3224	9.97863	1.07773
392			au26a97	0.0670293	0.00690627	0.00854125	0.000703241	0.399552	0.0439253	0.00209798	65.8765	6.57199	54.8266	4.49499	-114.879	117.696			57.1058	8.5993	3.04801	0.0808358	72.1255	81.3256									54.8266
393			au26a98	0.0628868	0.00601223	0.00965173	0.000711568	0.385572	0.059629	0.00309532	61.9268	5.74353	61.9207	4.54321	590.137	112.575			61.9226	8.31873	1.10873e-06	0.998811	60.1443	59.7855	0.283069	2.90161e-05	0.00209703	4.35816e-05	0.0684939	0.000969419	1.46724	4.90467e-05	61.9207	11.7908	1.02505
394			au26a99	0.0623871	0.00750238	0.00880375	0.000622398	0.293945	0.0588384	0.0024278	61.4493	7.17044	56.5043	3.97722	561.121	89.9226			57.2253	7.67801	0.482823	0.487148	91.4169	115.161									56.5043
395			au26a100	0.0760311	0.0134666	0.00901998	0.000699168	0.218816	0.0874936	0.00433261	74.4067	12.7076	57.8859	4.46684	1371.39	95.2785			58.6427	8.85764	1.71742	0.190027	74.6654	104.361									57.8859
396			au26a101	0.0561227	0.00467974	0.00873599	0.00025869	0.177564	0.0574753	0.00130901	55.4443	4.49922	56.0713	1.65318	509.816	50.0689			56.0277	3.24637	0.0193373	0.889405	1015.24	753.347	0.283015	2.25214e-05	0.00349353	0.000131319	0.114436	0.00552723	1.46724	4.43266e-05	56.0713	9.70486	0.795766
397			au26a102	0.0576106	0.00651738	0.00887077	0.000633123	0.315447	0.0503808	0.00213776	56.8738	6.25716	56.9325	4.04549	212.598	98.3118			56.9201	7.63928	8.70214e-05	0.992528	105.355	122.093	0.283077	3.49423e-05	0.00270855	0.000103559	0.0809024	0.00280518	1.46728	4.86279e-05	56.9325	11.9263	1.23438
398			au27a12	0.0656449	0.00647077	0.00939004	0.000508708	0.2748	0.0526987	0.00161977	64.5583	6.16557	60.2496	3.24883	315.847	69.9003			60.8238	6.28777	0.492688	0.482729	454.987	343.429	0.283046	2.86846e-05	0.00235499	7.3088e-05	0.0750073	0.00330248	1.46728	4.64767e-05	60.2496	10.9225	1.01343
399			au27a11	0.049535	0.00547	0.00933689	0.000679782	0.329657	0.0406216	0.00161675	49.091	5.29201	59.9102	4.34162	-311.299	101.957			56.0158	7.68869	3.70733	0.0541745	97.8379	111.601									59.9102
400			au27a10	0.0721866	0.0107759	0.00956016	0.00050502	0.176936	0.0705453	0.00306946	70.7723	10.205	61.336	3.22474	944.268	89.1215			61.7456	6.38815	0.858071	0.354279	173.759	209.268									61.336
401			au27a09	0.0665134	0.0045232	0.00958015	0.000300829	0.230877	0.0491606	0.00108591	65.3854	4.30635	61.4637	1.92086	155.5	51.717			61.8395	3.75216	0.832568	0.361531	1718.73	852.763									61.4637
402			au27a08	0.0464162	0.010717	0.00891225	0.000715001	0.173734	0.0792649	0.003995	46.0691	10.3992	57.1976	4.56848	1178.76	99.6645			55.9248	8.81362	1.11027	0.292027	69.8913	94.6092									57.1976
403			au27a07	0.0766072	0.0078358	0.00977282	0.000510822	0.255509	0.0615563	0.00204404	74.9501	7.3902	62.6938	3.2611	658.731	71.1939			63.6987	6.41002	2.80923	0.0937302	127.364	169.624									62.6938
404			au27a06	0.0600973	0.0103476	0.0100434	0.000791277	0.228787	0.0525413	0.00201769	59.2584	9.91115	64.4212	5.05018	309.041	87.4394			63.6949	9.69979	0.265333	0.606479	113.884	132.986									64.4212
405			au27a05	0.063316	0.00686839	0.00897069	0.000590069	0.303183	0.0558281	0.00203128	62.3367	6.55877	57.571	3.77001	445.54	80.8785			58.3215	7.25503	0.535956	0.464116	183.822	197.509	0.283033	3.16821e-05	0.00210457	7.53999e-05	0.0655759	0.00323571	1.46728	4.37913e-05	57.571	10.417	1.11938
406	PGUP-16		au25a136	0.0171472	0.00390147	0.0140999	0.00141781	0.220971	0.0109473	0.000483731	17.2633	3.8947	90.2593	9.01272	-6989.28	564.68			23.6874	7.57627	65.2994	6.43408e-16	191.343	161.291									90.2593
407			au25a137	0.184525	0.0268285	0.0136119	0.0013657	0.345037	0.123421	0.0054376	171.947	22.9976	87.1561	8.68565	2006.27	78.2059			87.2401	17.371	14.2024	0.000164159	75.9608	84.4698									87.1561
408			au25a138	0.0777081	0.0360098	0.0125889	0.00219521	0.188149	0.0704616	0.00499926	75.9879	33.9273	80.6469	13.9753	941.836	145.38			80.2197	27.2435	0.0186553	0.891357	76.5863	97.7822	0.28311	4.11714e-05	0.000701821	2.8205e-05	0.0257394	0.00105391	1.46723	5.25766e-05	80.6469	13.6722	1.45426
409			au25a139	0.0824441	0.0106476	0.0126674	0.00157802	0.482284	0.0538588	0.00307257	80.4402	9.98794	81.1464	10.0453	365.15	128.609			80.7892	17.2437	0.00480073	0.944762	36.3041	46.1232	0.283074	4.78498e-05	0.00090556	3.93516e-05	0.035738	0.00137669	1.46719	5.96804e-05	81.1464	12.4295	1.69036
410			au25a140	0.110566	0.0174667	0.0125145	0.00142187	0.359607	0.0652164	0.0030004	106.483	15.9697	80.1729	9.05268	781.326	96.6867			83.3202	17.7169	2.91257	0.0878904	85.0386	98.5671									80.1729
411			au25a141	0.0275962	0.0291013	0.0120471	0.00126539	0.0498024	0.0591261	0.00370135	27.6411	28.7555	77.1963	8.06013	571.744	136.182			73.9133	15.6687	2.95052	0.0858451	168.99	184.43									77.1963
412			au25a142	0.0149354	0.00301556	0.0120591	0.00125971	0.258688	0.0115276	0.000494061	15.053	3.01689	77.2728	8.02387	-6374.22	475.972			17.8265	5.97668	62.9581	2.11146e-15	64.4643	95.3424									77.2728
413			au25a143	0.0804954	0.0116768	0.0126428	0.000742041	0.202302	0.0637089	0.0022397	78.6106	10.9732	80.9899	4.72378	731.98	74.4731			80.7577	9.1995	0.0465877	0.829111	260.146	228.077									80.9899
414			au25a146	0.0987565	0.0138987	0.0131434	0.000956841	0.25864	0.0664303	0.00238119	95.6278	12.844	84.1756	6.08817	819.963	74.8664			85.3381	11.895	0.804351	0.369793	48.3259	83.1531	0.283106	5.34221e-05	0.00069389	5.27908e-06	0.0226528	0.000249844	1.46726	5.87489e-05	84.1756	13.6312	1.887
415			au25a147	0.0787952	0.0119263	0.0123235	0.000846494	0.226909	0.0601241	0.00227779	77.0116	11.2253	78.9572	5.39042	608.045	81.9132			78.7226	10.432	0.0297066	0.863157	63.0975	94.5903	0.283084	4.04812e-05	0.000722107	3.67403e-06	0.0246918	0.000300335	1.46731	5.77586e-05	78.9572	12.7418	1.43
416			au25a148	0.0966967	0.0141059	0.0125116	0.00153165	0.41959	0.0527331	0.00228882	93.7226	13.06	80.1549	9.75162	317.328	98.6825			83.6256	18.3882	1.15103	0.283334	71.8547	96.9766	0.283063	4.60096e-05	0.00068886	3.75093e-05	0.0227498	0.0011092	1.4673	5.58336e-05	80.1549	12.0152	1.62542
417			au25a150	0.133732	0.0164438	0.0134586	0.00151297	0.457123	0.0684728	0.00278806	127.446	14.7273	86.1813	9.62373	882.899	84.2021			91.7556	18.8761	9.18792	0.00243618	60.6717	96.934									86.1813
418			au25a151	0.121058	0.00906533	0.0132501	0.000780146	0.393132	0.0590178	0.00202639	116.031	8.21079	84.8544	4.96338	567.752	74.743			88.9521	9.70445	15.833	6.91859e-05	98.3263	133.689									84.8544
419			au25a152	0.0654781	0.00849182	0.0132113	0.000987857	0.28828	0.0471611	0.00196807	64.3993	8.09257	84.6077	6.2851	57.3905	99.5046			77.8218	11.1565	5.44333	0.0196433	53.0501	73.6966									84.6077
420			au25a153	0.082868	0.00705214	0.0124723	0.00094463	0.44499	0.0475548	0.00166401	80.8378	6.61265	79.9045	6.01446	77.1804	83.1258			80.2915	10.6798	0.0195664	0.888757	77.5829	114.109	0.283111	4.86168e-05	0.000824137	1.93942e-05	0.0308228	0.000646347	1.46728	5.2017e-05	79.9045	13.6875	1.71724
421			au25a156	0.0404016	0.0132388	0.0134837	0.00118786	0.134423	0.0346145	0.00168092	40.2161	12.9204	86.341	7.55553	-739.56	135.991			75.5311	13.665	11.0481	0.00088778	100.64	121.597									86.341
422			au25a157	0.0808371	0.00699754	0.0130793	0.000619673	0.273661	0.0497144	0.00173915	78.9317	6.57378	83.7679	3.9431	181.663	81.5118			82.8431	7.46385	0.526342	0.46815	99.7115	132.2	0.283112	4.37591e-05	0.000749209	8.41836e-06	0.0273205	0.000533436	1.46727	5.5666e-05	83.7679	13.8111	1.54565
423			au25a158	0.0976196	0.0110286	0.0144183	0.000859789	0.263914	0.0569417	0.0018635	94.5766	10.2023	92.2829	5.46378	489.277	72.1997			92.6137	10.5209	0.0502561	0.822617	70.2812	103.186									92.2829
424			au25a159	0.0829073	0.0227099	0.0128828	0.00118715	0.168206	0.0739956	0.00340443	80.8746	21.2938	82.5176	7.55552	1041.35	92.8518			82.4092	14.8461	0.0059234	0.938649	45.7994	65.9237	0.283078	5.61053e-05	0.000619668	1.03321e-05	0.0230771	0.000317143	1.46723	4.78492e-05	82.5176	12.5838	1.98198
425			au25a160	0.0338942	0.0116222	0.0133728	0.00119812	0.130643	0.0292799	0.00122075	33.8452	11.4141	85.6351	7.62163	-1234.19	130.308			70.278	13.2859	16.6043	4.60456e-05	108.985	134.584									85.6351
426			au25a161	0.0954518	0.0176981	0.0137131	0.00148121	0.291279	0.0636497	0.00301027	92.5693	16.4045	87.7994	9.4193	730.011	100.221			88.5708	18.0749	0.0846759	0.771057	57.7348	81.2002	0.283121	4.67283e-05	0.000941639	4.28643e-05	0.0354845	0.00134486	1.46729	5.03936e-05	87.7994	14.2255	1.65047
427			au25a162	0.13196	0.014997	0.0128601	0.000959443	0.328233	0.0887343	0.003641	125.858	13.4525	82.3733	6.10644	1398.43	78.6559			84.671	12.1302	11.0787	0.000873266	64.821	93.475									82.3733
428	PGAK-13.1		au26a48	0.0268557	0.00259019	0.00725018	0.000434926	0.310987	0.0311216	0.00122808	26.9091	2.56125	46.5691	2.78353	-1047.55	118.232			35.4381	4.29555	39.2522	3.72451e-10	95.4133	125.487									46.5691
429			au26a49	0.0336353	0.00385637	0.00768477	0.000479776	0.272266	0.0399446	0.00149097	33.5909	3.78827	49.3498	3.06925	-354.54	96.456			43.6086	5.34197	14.3257	0.000153747	92.934	131.131									49.3498
430			au26a52	0.0539212	0.00947079	0.00787698	0.000711844	0.257257	0.0671344	0.00302787	53.3256	9.12448	50.5793	4.55298	841.945	93.872			50.9112	8.83591	0.0911025	0.762781	113.647	129.692	0.283061	3.01372e-05	0.00186672	2.13295e-05	0.0618553	0.000736085	1.46726	4.44318e-05	50.5793	11.2645	1.06469
431			au26a53	0.0476459	0.0033037	0.00694376	0.000291433	0.302649	0.04853	0.00139409	47.2617	3.20196	44.6076	1.86574	125.186	67.635			45.0442	3.58123	0.694963	0.404484	349.279	555.585	0.283036	2.87082e-05	0.00139073	7.42916e-05	0.0478607	0.00304038	1.46725	3.65854e-05	44.6076	10.2776	1.01429
432			au26a58	0.0934956	0.00889118	0.00728917	0.000523927	0.377916	0.0908743	0.00415844	90.7545	8.25605	46.8186	3.35301	1443.97	87.1746			47.0444	6.70531	31.64	1.85568e-08	109.852	123.051									46.8186
433			au26a59	0.0104664	0.00256106	0.00695774	0.000879993	0.258439	0.0151597	0.000763403	10.5722	2.57352	44.6972	5.6336	-4091.62	320.419			13.6856	5.03004	37.5738	8.80196e-10	76.218	102.898									44.6972
434			au26a60	0.0284284	0.00968693	0.00747737	0.000649398	0.127438	0.0427959	0.00198704	28.463	9.56405	48.0229	4.15522	-179.475	115.867			45.5299	7.92466	3.93732	0.0472257	64.8006	344.866									48.0229
435			au26a68	0.0470305	0.00519777	0.0077677	0.000478347	0.278601	0.0424892	0.00185314	46.665	5.04066	49.8803	3.05986	-197.454	109.225			49.2547	5.78807	0.395739	0.529301	77.8052	126.168	0.2831	3.16465e-05	0.00172797	1.24823e-05	0.0546194	0.000891553	1.46729	4.63555e-05	49.8803	12.6416	1.11786
436			au26a69	0.0414909	0.00547198	0.00783229	0.000436115	0.211101	0.0429578	0.0017552	41.2786	5.33481	50.2935	2.78953	-170.056	101.774			48.8763	5.30997	2.72979	0.0984872	107.841	146.68									50.2935
437			au26a70	0.053127	0.00555164	0.00751687	0.000390368	0.248486	0.0516289	0.0017902	52.5601	5.35267	48.2756	2.4977	269.007	79.5209			48.7138	4.87494	0.64772	0.420933	151.452	189.004	0.283079	2.39318e-05	0.00169107	1.57516e-05	0.0550392	0.000351994	1.46729	4.50383e-05	48.2756	11.8795	0.845408
438			au26a75	0.049231	0.0111602	0.0073792	0.000770631	0.230343	0.066033	0.00286978	48.7968	10.8002	47.3947	4.93141	807.423	90.9526			47.5394	9.6076	0.016867	0.896669	53.1802	68.8152	0.283051	2.30315e-05	0.00165888	7.79883e-05	0.0555124	0.00262819	1.46725	3.59991e-05	47.3947	10.8696	0.813687
439			au26a78	0.0540373	0.00564059	0.00765399	0.000497016	0.311043	0.0495999	0.00188428	53.4374	5.43373	49.153	3.17963	176.285	88.6054			49.8493	6.11315	0.633587	0.42604	115.603	137.589									49.153
440			au26a79	0.0436014	0.00837195	0.00798433	0.000576896	0.188149	0.0475502	0.00198866	43.3341	8.14558	51.2659	3.68945	76.9502	99.3576			50.3333	7.11969	0.921972	0.336954	78.5004	117.052									51.2659
441			au26a80	0.0556989	0.00507763	0.00780472	0.000521638	0.366579	0.0466278	0.00184311	55.0368	4.88372	50.1171	3.33665	30.2046	94.7364			51.209	6.32194	1.04762	0.306056	101.218	124.781									50.1171
442			au26a81	0.0689761	0.00657013	0.00738371	0.000455593	0.32389	0.0634112	0.00268746	67.7273	6.24073	47.4236	2.91542	722.051	89.9265			48.8071	5.77151	11.3627	0.000749334	218.519	219.16									47.4236
443			au26a82	0.0453133	0.0065383	0.00725643	0.00047558	0.227108	0.0517798	0.0020529	44.9984	6.35109	46.609	3.0437	275.7	90.8149			46.4161	5.89227	0.0636277	0.800854	234.053	177.06	0.283054	2.64727e-05	0.00131085	3.8588e-05	0.0443865	0.00169618	1.46725	4.41009e-05	46.609	10.9461	0.935253
444	PGAK-18.5		au25a94	0.0381394	0.00570597	0.00772198	0.000829433	0.358977	0.0413307	0.00187514	38.0059	5.58089	49.5879	5.30589	-267.163	115.201			44.2002	8.94102	3.53671	0.0600249	107.562	162.105	0.28308	3.03074e-05	0.00179108	5.66719e-05	0.0556351	0.0014689	1.46726	5.15002e-05	49.5879	11.9272	1.07063
445			au25a95	0.104392	0.015034	0.00768554	0.000570902	0.2579	0.114918	0.00459895	100.823	13.8223	49.3547	3.6522	1878.6	72.1158			49.2588	7.30433	14.1209	0.000171429	196.573	174.541									49.3547
446			au25a98	0.0640074	0.00789996	0.00792541	0.000948474	0.484819	0.0635009	0.00297405	62.9968	7.53894	50.8891	6.06618	725.05	99.327			54.399	11.4183	2.95697	0.0855071	55.1203	86.6221	0.283044	2.80766e-05	0.00156358	6.13059e-05	0.0455731	0.001621	1.46726	4.28182e-05	50.8891	10.6943	0.991951
447			au25a99	0.0334835	0.00939952	0.00838205	0.000686804	0.145941	0.0500926	0.00241544	33.4418	9.2349	53.809	4.39062	199.293	111.992			50.7846	8.31375	4.53928	0.0331254	128.379	137.576									53.809
448			au25a100	0.0471035	0.0148363	0.00756427	0.00146687	0.307839	0.0531604	0.00269839	46.7358	14.3868	48.5789	9.38506	335.65	115.03			48.1731	17.6442	0.0160463	0.8992	163.154	169.156	0.28312	3.10472e-05	0.00178184	1.21406e-05	0.05478	0.000917251	1.46731	5.36302e-05	48.5789	13.299	1.09661
449			au25a101	0.00776226	0.00111318	0.00869516	0.000668963	0.268237	0.00733912	0.000297471	7.85123	1.12159	55.8103	4.27524	-28632	21923.5			7.74572	2.24335	134.584	4.07207e-31	202.477	224.591									55.8103
450			au25a104	0.0119634	0.00368095	0.00771883	0.00106623	0.224472	0.0157585	0.000689204	12.0753	3.69339	49.5677	6.82069	-3852.55	261.865			18.0753	6.99518	28.6837	8.52171e-08	150.305	178.732									49.5677
451			au25a105	0.0506464	0.00601454	0.00745274	0.000620175	0.35036	0.0587928	0.00220908	50.1656	5.81267	47.8653	3.96833	559.432	81.9083			48.3916	7.48227	0.158343	0.690688	115.201	147.856	0.283068	4.17104e-05	0.00179242	4.32442e-05	0.0553825	0.000968836	1.46729	4.11737e-05	47.8653	11.4519	1.47351
452			au25a106	0.0719566	0.00974441	0.00812553	0.000777582	0.35333	0.0777222	0.00330017	70.5545	9.23013	52.1688	4.97222	1139.78	84.4452			54.0805	9.76906	4.30011	0.0381101	98.837	114.729	0.283049	2.7484e-05	0.00260766	9.28945e-05	0.0876732	0.00434204	1.46726	4.13561e-05	52.1688	10.9011	0.970999
453			au25a107	0.0531866	0.006653	0.00849298	0.000606203	0.285307	0.0498137	0.00198647	52.6176	6.41419	54.5181	3.87492	186.311	92.839			54.1581	7.35191	0.086154	0.769125	363.187	270.491	0.28309	3.80231e-05	0.00188519	5.72395e-05	0.0605597	0.00155999	1.46729	5.00185e-05	54.5181	12.2639	1.34315
454			au25a108	0.0465993	0.00845312	0.00768891	0.000969859	0.347677	0.0581381	0.00356119	46.2467	8.20099	49.3763	6.20441	534.971	134.084			48.447	11.3682	0.139391	0.708887	161.929	157.77	0.283098	3.77146e-05	0.00203692	6.1494e-05	0.0671169	0.00175606	1.46728	5.13213e-05	49.3763	12.6163	1.33221
455			au25a109	0.0517399	0.0142217	0.00816323	0.00085561	0.190659	0.0664588	0.0041669	51.2219	13.7301	52.41	5.47096	820.86	130.936			52.312	10.7039	0.00744403	0.931244	96.4601	131.321									52.41
456			au25a111	0.0468978	0.0149859	0.00795148	0.00104245	0.205139	0.0636669	0.00257698	46.5364	14.5348	51.0558	6.66708	730.583	85.7639			50.5372	12.9031	0.0949116	0.758022	177.403	172.038	0.283083	4.16091e-05	0.00237037	3.52591e-05	0.0797843	0.00141005	1.46732	5.23085e-05	51.0558	12.0429	1.46985
457	LB09-16.7		ap07A36	0.0481162	0.0364414	0.00769144	0.000779897	0.0669415	0.202081	0.0146394	47.7173	35.3033	49.3925	4.98916	2843.07	118.055			49.3748	9.95057	0.00225281	0.962145	81.5208	64.2279									49.3925
458			ja06a22	0.0545231	0.00267934	0.00805471	0.000538794	0.680606	-	-	53.9053	2.5799	51.716	3.44554	-	-			53.6977	5.13841	0.745907	0.387775	95.6679	144.806									51.716
459			ja06a18	0.0553164	0.0034337	0.00858317	0.000569786	0.53472	-	-	54.6689	3.30377	55.0945	3.64182	-	-			54.8375	6.04577	0.0160185	0.899287	94.8204	132.633	0.283016	2.12195e-05	0.0012262	3.033e-05	0.0334141	0.000754603	1.46724	5.21509e-05	55.0945	9.79029	0.749763
460			ja06a14	0.0508871	0.00314954	0.00783299	0.000456129	0.470425	-	-	50.3982	3.04314	50.298	2.91754	-	-			50.3441	5.10565	0.00106655	0.973956	133.913	183.818	0.282983	3.36013e-05	0.00151361	8.50005e-06	0.0460127	0.000146755	1.46726	7.01757e-05	50.298	8.52069	1.1874
461			ja06a08	0.0606463	0.00873196	0.00848445	0.000524359	0.214619	-	-	59.7842	8.35932	54.4636	3.3518	-	-			54.8607	6.58684	0.407935	0.523023	470.323	521.405	0.283021	3.28537e-05	0.00228892	0.000175415	0.0764634	0.00628626	1.46727	3.87778e-05	54.4636	9.93276	1.16082
462			ja06a09	0.0484003	0.00359044	0.00765546	0.000507196	0.446554	-	-	47.9925	3.47737	49.1623	3.24475	-	-			48.6497	5.69975	0.109132	0.741136	192.382	232.185	0.282977	4.56102e-05	0.00266297	0.000148489	0.0895317	0.00564563	1.46726	5.00712e-05	49.1623	8.23706	1.6118
463			ja06a10	0.0551309	0.00466829	0.00777947	0.000548724	0.416496	-	-	54.4903	4.49243	49.9556	3.51	-	-			51.2927	6.52014	1.05949	0.303334	162.096	211.227	0.282963	3.39183e-05	0.00249084	6.25487e-05	0.0795082	0.00194948	1.46722	4.43739e-05	49.9556	7.77923	1.19868
464			ja06a11	0.0613561	0.00961581	0.00823118	0.000597193	0.23147	-	-	60.4635	9.1993	52.8444	3.81832	-	-			53.4258	7.50756	0.69541	0.404327	312.472	387.004									52.8444
465			ja06a12	0.0468519	0.00306405	0.00796973	0.000456632	0.43805	-	-	46.4919	2.97195	51.1726	2.92037	-	-			48.8954	4.9907	2.24778	0.133806	148.243	188.49	0.282977	3.12981e-05	0.00213821	3.58996e-05	0.0683575	0.00161373	1.46726	5.28697e-05	51.1726	8.31128	1.10603
466	PK05-39		au24a46	0.0867566	0.00904447	0.0140028	0.000685636	0.234837	0.0504096	0.00126801	84.4775	8.45046	89.642	4.35885	213.922	58.2663			88.9039	8.37047	0.366187	0.545088	235.443	434.054	0.283127	3.0108e-05	0.000541531	4.51619e-06	0.0149224	0.000353622	1.46727	4.10186e-05	89.642	14.476	1.06341
467			au24a47	0.106487	0.00918872	0.0134427	0.00121972	0.525756	0.0514076	0.0017698	102.747	8.43215	86.0802	7.75853	259.147	79.0938			92.7946	14.1254	4.42044	0.0355108	87.8698	208.697									86.0802
468			au24a48	0.0921357	0.0112317	0.0135755	0.000534933	0.16162	0.0624214	0.00157266	89.4909	10.4424	86.9247	3.40222	688.576	53.7516			87.0611	6.71289	0.0602056	0.806172	403.63	761.128									86.9247
469			au24a50	0.0813727	0.00959943	0.0130592	0.000837998	0.271975	0.0496075	0.0012995	79.4346	9.01363	83.6401	5.33244	176.642	61.0938			82.8611	10.1159	0.212295	0.644976	223.775	407.004	0.283109	2.83798e-05	0.000910948	4.11667e-05	0.0226442	0.00124162	1.46723	4.82375e-05	83.6401	13.7099	1.00243
470			au24a51	0.0958003	0.0721483	0.0152076	0.00207665	0.0906596	0.0785963	0.00321688	92.8923	66.8535	97.2964	13.1864	1161.99	81.1336			97.2031	26.2211	0.00434407	0.947442	103.712	245.318									97.2964
471			au24a53	0.0945854	0.00881	0.0134351	0.000623039	0.248939	0.0488913	0.00139866	91.7659	8.17252	86.0316	3.96312	142.622	67.1382			86.684	7.70464	0.493244	0.482488	231.729	477.382	0.283076	2.92482e-05	0.000791838	1.72801e-05	0.017757	0.000454649	1.46727	5.20514e-05	86.0316	12.5865	1.03323
472			au24a56	0.107157	0.0129784	0.0131491	0.000948193	0.297695	0.0686444	0.00222169	103.362	11.9026	84.2121	6.03311	888.072	66.8753			86.2384	11.8048	2.66982	0.102265	120.354	265.536									84.2121
473			au24a57	0.0975944	0.0109867	0.0133899	0.00078863	0.26159	0.0561995	0.00150033	94.5533	10.1638	85.7443	5.01667	460.258	59.1923			86.7483	9.76276	0.757177	0.384214	481.254	933.788	0.283092	2.86554e-05	0.000582239	2.17816e-05	0.0128331	0.00054114	1.46722	4.95943e-05	85.7443	13.1649	1.01223
474			au24a58	0.0916863	0.00828452	0.0132169	0.000515864	0.215979	0.0604308	0.00164969	89.073	7.70547	84.6435	3.28209	619.034	58.9164			85.0369	6.4194	0.330104	0.565596	383.641	762.98	0.283117	2.43697e-05	0.000900408	2.91466e-05	0.0214298	0.000837719	1.46721	4.60621e-05	84.6435	14.0009	0.860765
475			au24a59	0.0944015	0.00964767	0.0131568	0.000839906	0.312325	0.0516824	0.00147365	91.5953	8.95108	84.2612	5.34407	271.383	65.3639			85.5105	10.2471	0.679242	0.409845	359.607	785.307	0.28313	2.56121e-05	0.000711298	1.86944e-05	0.017009	0.000509717	1.46726	4.43565e-05	84.2612	14.4715	0.904607
476			au24a60	0.0653829	0.0207036	0.0130644	0.00106972	0.129291	0.0580203	0.00300434	64.3086	19.7319	83.6733	6.80693	530.529	113.434			82.2237	13.2883	0.950691	0.329541	125.181	314.173									83.6733
477			au24a61	0.0949027	0.0104867	0.0130393	0.00114147	0.396116	0.0499349	0.00154016	92.0602	9.72506	83.5132	7.26368	191.964	71.7315			85.7975	13.5897	0.795953	0.372306	343.2	613.024	0.283177	3.73415e-05	0.000440581	1.11209e-05	0.0110479	0.000347757	1.46726	4.56426e-05	83.5132	16.1471	1.31866
478			au24a62	0.129151	0.00912654	0.0137379	0.000794093	0.408989	0.0609036	0.00187049	123.334	8.20699	87.9574	5.04968	635.831	66.0983			92.5789	9.88557	20.6887	5.40347e-06	151.963	394.447									87.9574
479			au24a63	0.0969336	0.00669529	0.0136017	0.000905633	0.481985	0.0411118	0.00159336	93.9419	6.19754	87.0914	5.75974	-280.664	98.6755			90.0097	10.2738	1.25989	0.261671	95.908	270.625	0.2831	6.73736e-05	0.00113307	5.18089e-05	0.030911	0.0015767	1.46728	5.43092e-05	87.0914	13.4498	2.37985
480	PGLT-19		au25a52	0.0690291	0.01666	0.0081953	0.00101225	0.255888	0.0866597	0.00360151	67.7777	15.8239	52.615	6.47234	1352.94	80.1682			53.5638	12.7949	0.94601	0.330741	135.231	149.94	0.283049	5.29488e-05	0.00145108	5.97433e-05	0.0557387	0.00219099	1.46727	7.487e-05	52.615	10.9093	1.87066
481			au25a53	0.0915835	0.0126136	0.0109657	0.00117793	0.389974	0.0742473	0.00521438	88.9774	11.7331	70.3044	7.51108	1048.2	141.588			73.4455	14.5288	2.74718	0.0974236	72.9607	91.9806									70.3044
482			au25a54	0.0664637	0.0125189	0.0106668	0.00139337	0.346754	0.0500651	0.00218885	65.3381	11.9193	68.3983	8.88743	198.019	101.566			67.5183	16.3487	0.0635456	0.800978	66.2012	91.1915	0.283029	4.02912e-05	0.00137768	6.87476e-06	0.0391857	0.000390882	1.46725	3.83925e-05	68.3983	10.5452	1.42357
483			au25a55	0.147801	0.0175727	0.0115447	0.000750614	0.273428	0.116978	0.00506378	139.969	15.5454	73.9959	4.78354	1910.56	77.7091			74.3145	9.56545	18.2435	1.94388e-05	75.2531	90.542									73.9959
484			au25a56	0.0156219	0.00257493	0.0103367	0.000932533	0.273666	0.015209	0.000952928	15.7396	2.57432	66.2927	5.94999	-4071	396.588			19.2769	5.06592	75.4631	3.72293e-18	71.4445	100.206									66.2927
485			au25a57	0.0971993	0.0207444	0.00838149	0.00120072	0.335625	0.100626	0.00581963	94.1878	19.1975	53.8054	7.67603	1635.68	107.418			54.6755	15.3293	4.7799	0.0287937	28.4357	129.717									53.8054
486			au25a58	0.0929999	0.0204191	0.0101361	0.00109104	0.245125	0.0965588	0.00471439	90.2941	18.9691	65.0125	6.96274	1558.67	91.5958			66.1017	13.8291	1.81873	0.177461	72.7474	87.0715									65.0125
487			au25a59	0.0949029	0.0100145	0.0122409	0.00110103	0.426192	0.0623245	0.00249422	92.0604	9.2872	78.4309	7.01188	685.261	85.4284			81.9919	13.2093	2.30815	0.128698	97.6103	136.859									78.4309
488			au25a62	0.0325835	0.00745116	0.0099164	0.00096723	0.213265	0.03552	0.00218778	32.5572	7.32704	63.6104	6.17394	-667.798	169.859			51.1083	10.3172	13.4372	0.000246675	56.7612	90.1267									63.6104
489			au25a63	0.0793687	0.0186704	0.0101679	0.00187164	0.391253	0.0641756	0.00323595	77.5513	17.5636	65.2156	11.9439	747.423	106.55			67.7536	22.8307	0.526256	0.468182	97.002	156.314	0.283059	3.60313e-05	0.00174174	2.28847e-05	0.0478993	0.000458233	1.46726	6.2099e-05	65.2156	11.4965	1.27293
490			au25a64	0.148189	0.0123535	0.00978176	0.000615416	0.377353	0.118459	0.005268	140.312	10.9246	62.7508	3.9288	1933.11	79.6193			61.3587	7.85021	54.3533	1.67495e-13	113.189	142.904									62.7508
491			au25a65	0.0259144	0.00479833	0.00836769	0.00107701	0.347565	0.0265351	0.000987978	25.9779	4.74907	53.7171	6.88526	-1553.34	125.337			32.4129	8.88624	16.275	5.47816e-05	75.0558	108.558									53.7171
492			au25a66	0.0287994	0.00316013	0.0111599	0.000808513	0.330124	0.0204179	0.000774404	28.8293	3.11892	71.5427	5.15449	-2545.8	162.813			35.9576	5.95964	70.801	3.95129e-17	101.421	152.739									71.5427
493			au25a67	0.080413	0.0100254	0.00925947	0.00129068	0.559021	0.0613139	0.00267107	78.5331	9.42198	59.4157	8.24395	650.265	93.5324			65.8814	15.4632	5.18879	0.022733	74.6766	93.5987	0.28299	3.08545e-05	0.00100839	1.2622e-05	0.0278307	0.000292716	1.46727	5.49817e-05	59.4157	9.00035	1.0903
494			au25a68	0.163111	0.0173584	0.00921355	0.000896651	0.457234	0.131257	0.00700132	153.422	15.1537	59.1224	5.72741	2114.85	93.5212			54.2864	11.3701	43.9345	3.39541e-11	58.1511	78.9198	0.282989	3.09555e-05	0.00139569	6.67849e-05	0.0397447	0.00172566	1.46724	5.27484e-05	59.1224	8.91821	1.09388
495			au25a69	0.0326607	0.00785964	0.0100797	0.00136561	0.281495	0.0326089	0.00190492	32.6331	7.72814	64.6529	8.71545	-909.807	169.76			45.7022	12.9902	10.5255	0.00117737	65.7943	88.9137	0.283012	3.67597e-05	0.0010644	1.15692e-05	0.0300943	0.000160264	1.4673	4.52466e-05	64.6529	9.84745	1.29888
496	LB11-O-16		ap23a39	0.0243549	0.0072842	0.00375866	0.000419191	0.186446	0.0648888	0.00228451	24.4332	7.2204	24.1844	2.69216	770.733	74.1153			24.2017	5.29002	0.00118635	0.972518	608.235	837.801	0.282778	2.78945e-05	0.00089713	3.66259e-05	0.0238227	0.00115334	1.46725	4.7939e-05	24.1844	0.74056	0.986445
497			ap23a48	0.0226387	0.00259685	0.00364336	0.000210139	0.251408	0.0507479	0.00173413	22.7306	2.57843	23.4439	1.34973	229.396	78.9309			23.3433	2.59855	0.0757567	0.783134	4247.85	2023.91	0.28263	3.32076e-05	0.000839671	2.09402e-05	0.0214445	0.000518529	1.46719	4.11899e-05	23.4439	-4.5372	1.17495
498			ap23a37	0.0256	0.00264119	0.0037802	0.000354894	0.454981	0.058401	0.0023574	25.6666	2.61488	24.3228	2.27918	544.839	88.2124			24.8267	4.12988	0.273112	0.601251	649.411	646.369	0.282738	3.09413e-05	0.000580915	4.36366e-05	0.0176381	0.00124916	1.46717	3.551e-05	24.3228	-0.700043	1.09435
499			ap23a36	0.023644	0.00218493	0.00387822	0.000220716	0.307931	0.0566021	0.00186833	23.7283	2.1673	24.9523	1.41733	476.064	72.9872			24.6815	2.66347	0.311438	0.5768	1525.3	711.597									24.9523
500			ap23a44	0.0286848	0.00427951	0.00390729	0.000354406	0.303986	0.0640877	0.00319551	28.7161	4.22417	25.1389	2.27575	744.526	105.412			25.6051	4.4208	0.742954	0.388714	606.972	546.16	0.282674	3.00579e-05	0.000811833	1.61649e-05	0.0203985	0.000419203	1.46724	5.20346e-05	25.1389	-2.93147	1.06334
501			ap23a49	0.0201119	0.00260815	0.00399188	0.000323476	0.312431	0.0439064	0.00214929	20.2186	2.59606	25.6821	2.07697	-115.941	120.652			23.8011	3.69174	3.89319	0.0484821	677.569	558.918	0.282609	2.75788e-05	0.00033228	6.07149e-06	0.00874201	0.000188092	1.4672	5.03805e-05	25.6821	-5.19914	0.975865
502			ap23a52	0.0284628	0.00328266	0.00411349	0.000300497	0.316702	0.052237	0.00274071	28.497	3.24091	26.4629	1.92919	295.797	119.748			26.8066	3.70292	0.402527	0.525789	565	670.589	0.282789	2.3107e-05	0.000545415	1.24317e-05	0.0170846	0.00044955	1.46721	3.74066e-05	26.4629	1.15861	0.817113
503			ap23a47	0.0278221	0.0027782	0.00418474	0.000282624	0.338171	0.0541213	0.00211751	27.8642	2.74458	26.9203	1.81432	376.099	88.033			27.1235	3.4327	0.119415	0.72967	823.091	772.989	0.2827	3.75224e-05	0.000864279	2.97252e-05	0.0236741	0.000685451	1.46718	5.61214e-05	26.9203	-1.96174	1.32729
504			ap23a38	0.039685	0.0190776	0.00423421	0.000660302	0.162197	0.115976	0.00503786	39.5165	18.6317	27.2379	4.23863	1895.09	78.1235			27.4156	8.46003	0.43892	0.507644	252.085	419.082									27.2379
505	LB11-O-10		ap23a22	0.0196971	0.00362745	0.00310832	0.000416455	0.363759	0.0583233	0.00244055	19.8057	3.6121	20.0064	2.67632	541.928	91.4906			19.9509	4.96119	0.00305812	0.955904	143.275	257.009	0.282716	2.37737e-05	0.000446723	6.58591e-06	0.0115778	0.000171499	1.46717	3.97027e-05	20.0064	-1.55897	0.840904
506			ap23a18	0.0188548	0.00370403	0.00330161	0.000197137	0.15197	0.063812	0.00219294	18.9666	3.69141	21.2485	1.26664	735.406	72.7597			21.1001	2.48691	0.377818	0.538774	249.828	1841.35	0.282701	3.15519e-05	0.00188635	6.74058e-05	0.057906	0.00243512	1.46723	4.1712e-05	21.2485	-2.07607	1.11609
507			ap23a12	0.0218969	0.00268622	0.00331358	0.000170697	0.209961	0.0586658	0.00139802	21.9938	2.6691	21.3254	1.09675	554.715	51.9895			21.3807	2.14868	0.0629113	0.801953	152.911	2367.82	0.282681	2.70545e-05	0.00293418	2.84814e-05	0.0985126	0.00170834	1.46727	3.57728e-05	21.3254	-2.7921	0.957069
508			ap23a34	0.0203917	0.00167326	0.00340855	0.000140772	0.251656	0.0465912	0.00137191	20.4971	1.66504	21.9355	0.904389	28.3238	70.597			21.712	1.73165	0.731243	0.39248	325.746	2829.56	0.282721	2.96833e-05	0.00235694	4.45417e-05	0.0788751	0.00137167	1.46721	2.61155e-05	21.9355	-1.34692	1.04991
509	LB11-S-36		ap23a77	0.0702661	0.00473075	0.0108754	0.000348528	0.238001	0.0496348	0.00122623	68.952	4.48815	69.7288	2.22258	177.928	57.6037			69.6306	4.29674	0.029694	0.863187	429.681	920.48	0.282974	3.04859e-05	0.00190855	0.00010354	0.0533135	0.0035583	1.46723	3.88638e-05	69.7288	8.59202	1.14918
510			ap23a78	0.071995	0.00423905	0.0106296	0.000347487	0.277603	0.047276	0.00111389	70.5909	4.01519	68.1613	2.21649	63.1922	56.1194			68.5283	4.26358	0.366137	0.545116	581.498	1098.38	0.282996	3.18385e-05	0.0034258	5.35031e-05	0.0919777	0.00209262	1.46721	3.74075e-05	68.1613	9.25643	1.12505
511			ap23a79	0.0753129	0.00761944	0.0108862	0.000528892	0.240109	0.0517539	0.00136897	73.7287	7.19479	69.7976	3.37274	274.551	60.6023			70.2177	6.56783	0.299218	0.584372	347.827	811.965	0.283017	2.82862e-05	0.00305115	2.78969e-05	0.080541	0.00106546	1.46721	3.49758e-05	69.7976	10.0578	0.999451
512			ap23a80	0.071854	0.00475042	0.010851	0.000415906	0.289878	0.0481689	0.000882318	70.4573	4.50014	69.5732	2.65232	107.573	43.2682			69.7281	5.06307	0.0383608	0.844722	494.824	2086.5	0.28302	4.23203e-05	0.00429055	0.000159771	0.111152	0.00430393	1.46715	5.59749e-05	69.5732	10.1016	1.49531
513			ap23a81	0.0733608	0.00509299	0.0107625	0.000470017	0.314531	0.0512543	0.00113092	71.8837	4.81789	69.0086	2.99766	252.285	50.7555			69.5584	5.70535	0.356989	0.550186	459.796	1033.05	0.282993	2.68393e-05	0.00293117	3.9094e-05	0.0772583	0.00126001	1.46721	3.32032e-05	69.0086	9.18706	0.948408
514			ap23a85	0.0658336	0.00493532	0.0100995	0.000410108	0.270832	0.0480601	0.00108676	64.738	4.70171	64.7791	2.61729	102.227	53.4679			64.7726	5.01802	7.57663e-05	0.993017	586.531	1333.72	0.282985	4.58206e-05	0.0030961	3.78038e-05	0.07905	0.000724345	1.46721	2.8536e-05	64.7791	8.82067	1.61919
515			ap23a86	0.0694098	0.00592625	0.0103621	0.000368044	0.208	0.056108	0.00169189	68.1392	5.62685	66.4545	2.34823	456.647	66.9001			66.6011	4.59299	0.0894688	0.764853	238.743	804.227	0.282997	3.21148e-05	0.00248903	5.70042e-05	0.0641078	0.00174156	1.4672	3.86387e-05	66.4545	9.30499	1.13481
516			ap23a87	0.0712456	0.00644367	0.0108595	0.000482785	0.245775	0.0487743	0.00159523	69.8807	6.10765	69.6276	3.0788	136.995	76.8372			69.6603	5.95009	0.00170705	0.967039	298.922	694.516	0.282963	3.66556e-05	0.00301901	8.44546e-05	0.0760163	0.00211605	1.46724	4.39021e-05	69.6276	8.14962	1.29542
517			ap23a88	0.0694876	0.00444224	0.0107909	0.000299481	0.217063	0.0478116	0.0012666	68.2131	4.21751	69.1901	1.90997	89.9593	62.7832			69.0864	3.71286	0.0532581	0.817488	364.873	946.687	0.282964	4.11749e-05	0.002873	1.16321e-05	0.0729809	0.00031576	1.46721	3.78345e-05	69.1901	8.19103	1.45513
518			ap23a89	0.0660951	0.0214159	0.0101983	0.000890712	0.134776	0.0575257	0.00283827	64.9871	20.3972	65.4093	5.68393	511.743	108.432			65.3924	11.2497	0.000427586	0.983505	285.451	602.544									65.4093
519			ap23a90	0.0677948	0.00972746	0.0107304	0.000851421	0.276499	0.052942	0.00271987	66.6046	9.25	68.8044	5.43034	326.311	116.618			68.4097	10.3317	0.0555272	0.81371	211.226	237.034									68.8044
520			ap23a91	0.0710028	0.00854378	0.0109138	0.00128712	0.490048	0.0439196	0.00232218	69.6506	8.10009	69.9736	8.20773	-115.199	130.299			69.8079	14.0736	0.00153913	0.968709	81.8534	81.1745									69.9736
521			ap23a92	0.0708618	0.00585187	0.0105429	0.00043021	0.247063	0.0508955	0.00118955	69.5169	5.5487	67.6081	2.74438	236.099	53.921			67.8408	5.31889	0.118143	0.731056	810.999	1437.38									67.6081
522			ap23a93	0.0666389	0.00723448	0.0107078	0.000602841	0.259294	0.0451183	0.00124877	65.5049	6.88684	68.6601	3.84499	-49.2632	67.3455			68.1419	7.34333	0.205795	0.650085	442.459	1006.59									68.6601
523	PGAK-26		au27a40	0.0924568	0.01075	0.0114402	0.000914159	0.343626	0.0633672	0.00277577	89.7894	9.99161	73.3299	5.82639	720.577	92.9682			75.6835	11.3107	2.85535	0.0910689	68.4972	85.2686									73.3299
524			au27a39	0.0837569	0.00734223	0.0117167	0.000557632	0.271459	0.0484893	0.00155787	81.671	6.87901	75.0918	3.5531	123.21	75.6718			75.9243	6.89066	0.922833	0.336733	215.688	204.155									75.0918
525			au27a38	0.0758846	0.00908517	0.0109863	0.000444861	0.169108	0.0591308	0.00185863	74.2684	8.57427	70.4358	2.83659	571.915	68.3761			70.6395	5.59923	0.199608	0.655037	242.977	273.76	0.282947	3.01549e-05	0.00454391	4.60667e-05	0.154788	0.00203708	1.46729	3.93456e-05	70.4358	7.53162	1.06574
526			au27a37	0.0813044	0.00592803	0.0116903	0.000463068	0.271639	0.0499761	0.00173727	79.3706	5.56663	74.9234	2.95063	193.882	80.8163			75.5313	5.70187	0.640652	0.423479	241.613	236.184	0.282959	3.71754e-05	0.00525609	0.000287764	0.177649	0.00858391	1.46724	4.63967e-05	74.9234	8.00969	1.31381
527			au27a36	0.0796526	0.00889799	0.0112852	0.00060376	0.239461	0.0535699	0.00176528	77.8182	8.36832	72.3413	3.84865	353.01	74.4479			72.8948	7.50937	0.430254	0.511868	124.607	219.738	0.283033	3.27027e-05	0.00354618	4.414e-05	0.11589	0.00140996	1.46728	3.43101e-05	72.3413	10.6667	1.15544
528			au27a35	0.07891	0.00674571	0.0115516	0.000537621	0.272212	0.0489106	0.00176624	77.1196	6.34852	74.0397	3.42615	143.546	84.7344			74.4826	6.60409	0.235449	0.627511	59.5447	156.825	0.283022	2.69621e-05	0.00339572	7.48757e-05	0.111267	0.00226679	1.46729	3.79782e-05	74.0397	10.2955	0.952652
529			au27a32	0.0631177	0.0103784	0.0107618	0.000926155	0.261691	0.0435597	0.00153406	62.1474	9.91242	69.0043	5.90681	-135.515	87.132			67.6805	11.1534	0.460712	0.497289	105.717	235.759									69.0043
530			au27a31	0.090304	0.00605778	0.0121287	0.000477974	0.293734	0.0517983	0.00143903	87.7866	5.64151	77.7162	3.0443	276.517	63.6269			79.058	5.90238	3.2467	0.0715674	173.091	221.252									77.7162
531			au27a30	0.0828124	0.00929336	0.0114127	0.000614652	0.239956	0.0556409	0.00172171	80.7856	8.71464	73.1545	3.91759	438.069	68.8726			73.8709	7.66289	0.772642	0.3794	118.291	166.826									73.1545
532			au27a28	0.0726175	0.005247	0.0110472	0.000288082	0.180453	0.0492285	0.00123209	71.1803	4.96703	70.8242	1.8368	158.727	58.5632			70.849	3.60744	0.00512184	0.942949	66.6591	517.111	0.282984	2.50889e-05	0.00112124	0.000193156	0.0342602	0.00648684	1.4673	3.76817e-05	70.8242	8.99127	0.886584
533			au27a27	0.0753746	0.00568632	0.0104052	0.000403456	0.256986	0.0508372	0.00131328	73.787	5.3691	66.7297	2.57406	233.454	59.6264			67.483	5.01977	1.74712	0.186239	250.839	335.574	0.282996	2.82497e-05	0.00459918	3.78506e-05	0.155454	0.00219182	1.46724	4.01484e-05	66.7297	9.1838	0.998238
534			au27a26	0.0867257	0.00935995	0.0115169	0.000500682	0.201404	0.0582076	0.00196159	84.4486	8.74548	73.8187	3.19085	537.584	73.736			74.4448	6.29779	1.48434	0.223103	656.167	212.16									73.8187
535			au27a23	0.0681521	0.00509158	0.011629	0.000417691	0.240386	0.0445815	0.00141741	66.9444	4.84005	74.5328	2.66166	-78.4691	77.7965			73.2721	5.06729	2.38038	0.122869	68.4954	220.379									74.5328
536			au27a22	0.0847818	0.00852028	0.0107914	0.000840318	0.387422	0.0537955	0.00161085	82.6307	7.9752	69.1931	5.3592	362.497	67.5369			71.8763	10.2602	3.02445	0.0820181	166.683	137.486									69.1931
537			au27a21	0.0788333	0.0117019	0.0110264	0.00160096	0.489071	-	-	77.0475	11.0137	70.6915	10.2079	-	-			73.3775	18.2702	0.349009	0.554676	13.1249	15.2786									70.6915
538			au27a20	0.082926	0.00577092	0.0111195	0.000404686	0.261486	0.0490287	0.00118971	80.8921	5.41099	71.2854	2.58009	149.206	56.8788			72.2718	5.0401	3.19872	0.0736956	186.659	452.689									71.2854
539			au27a19	0.0761793	0.00753121	0.0117683	0.000483518	0.207798	0.0482814	0.00163398	74.5465	7.10576	75.4202	3.0807	113.083	79.8605			75.3351	6.00321	0.0150112	0.902486	211.135	281.644	0.283007	2.99692e-05	0.00383982	4.85052e-05	0.131425	0.00284753	1.46724	4.11959e-05	75.4202	9.75968	1.05896
540			au27a18	0.0605527	0.00800655	0.011011	0.000402361	0.13818	0.0498123	0.00152567	59.6946	7.66554	70.5937	2.56554	186.244	71.3061			69.8755	5.03019	2.00158	0.157136	412.639	297.485									70.5937
541			au27a17	0.0825749	0.00743115	0.0106292	0.00057801	0.302131	0.0507088	0.00137287	80.5629	6.96993	68.1588	3.6869	227.613	62.5561			69.6643	7.1815	3.26786	0.0706493	809.469	410.364									68.1588
542			au27a16	0.0698252	0.00659727	0.0111193	0.000535309	0.254768	0.046269	0.00148143	68.5336	6.26155	71.2839	3.41287	11.6613	77.006			70.8549	6.53558	0.189634	0.663221	87.6336	196.896	0.282984	3.45425e-05	0.00333135	4.9636e-05	0.114079	0.00187069	1.46725	4.26135e-05	71.2839	8.91803	1.22065
543	PGUP-15		au26a25	0.0588333	0.00635364	0.00937052	0.00036138	0.178555	0.0591314	0.00173898	58.047	6.09291	60.125	2.30798	571.938	63.9736			59.968	4.5227	0.115567	0.733892	111.038	262.178	0.283028	3.28185e-05	0.0023733	6.30089e-05	0.0879125	0.00176927	1.46724	3.86333e-05	60.125	10.2954	1.15955
544			au26a26	0.0608682	0.00472146	0.00881287	0.00041522	0.3037	0.0481479	0.000895814	59.9966	4.51903	56.5625	2.6533	106.542	43.9577			57.137	5.08832	0.583071	0.445114	662.437	1098.29	0.283013	3.55729e-05	0.00519939	6.57776e-05	0.200418	0.00166816	1.46728	4.45573e-05	56.5625	9.58539	1.25693
545			au26a27	0.0679495	0.00579495	0.0088764	0.00048829	0.322514	0.0525618	0.00106979	66.7517	5.50971	56.9685	3.12003	309.927	46.3355			58.3509	6.04891	3.2769	0.0702618	483.927	1013.51									56.9685
546			au26a28	0.0462366	0.00595802	0.00897498	0.00066371	0.286945	0.0369208	0.00130959	45.8948	5.78232	57.5983	4.24049	-562.318	95.6663			54.1174	7.67179	3.68821	0.0547987	232.377	221.962									57.5983
547			au26a30	0.0499727	0.00441791	0.0090106	0.000367486	0.23066	0.0440555	0.000861289	49.5143	4.27237	57.8259	2.34781	-107.593	48.1075			56.4175	4.45783	3.6301	0.0567431	265.432	675.785									57.8259
548			au26a31	0.0620012	0.00873865	0.00882551	0.000687013	0.276154	0.0618083	0.00244889	61.0805	8.35505	56.6433	4.39003	667.484	84.8245			57.2273	8.50244	0.285145	0.593351	93.8243	167.174									56.6433
549			au26a32	0.0623455	0.00517712	0.00930089	0.000340935	0.220716	0.0459369	0.0012632	61.4096	4.94826	59.6803	2.17755	-5.69447	66.3553			59.8467	4.24951	0.122034	0.726839	1252.57	743.159									59.6803
550			au26a33	0.0640697	0.0040707	0.00922669	0.000336995	0.28743	0.0447033	0.00126395	63.0562	3.88444	59.2063	2.15255	-71.795	69.0956			59.7775	4.14898	0.990989	0.319497	717.574	1098.78	0.282973	4.62513e-05	0.00478874	0.000142723	0.162856	0.00419535	1.46721	4.85481e-05	59.2063	8.23713	1.63447
551			au26a36	0.0623548	0.00440517	0.00882173	0.000377248	0.302656	0.0448405	0.00114473	61.4185	4.2104	56.6192	2.41063	-64.3147	62.2972			57.3676	4.64131	1.31972	0.250641	357.959	1082.06	0.282947	3.84224e-05	0.00492714	0.000104312	0.150731	0.00246688	1.46725	5.41094e-05	56.6192	7.25682	1.35793
552			au26a39	0.066274	0.00801029	0.00918417	0.000643758	0.289966	0.0631224	0.00230427	65.1575	7.62798	58.9347	4.11216	712.358	77.5798			59.7779	7.96394	0.677387	0.410486	168.96	132.434									58.9347
553			au26a40	0.0526716	0.00513116	0.00910236	0.000633133	0.357003	0.0415714	0.00139836	52.1209	4.9494	58.4122	4.04462	-252.44	85.1617			56.2135	7.24786	1.49382	0.221631	295.867	246.9	0.283037	3.38865e-05	0.00311749	4.03567e-05	0.116218	0.000860283	1.46721	4.21459e-05	58.4122	10.5204	1.19725
554			au26a42	0.0549897	0.00565539	0.00931975	0.000263416	0.137413	0.0526493	0.00122921	54.3545	5.44308	59.8007	1.68241	313.714	53.116			59.5115	3.31464	0.995445	0.318411	805.881	1375.73	0.283004	5.23057e-05	0.0058524	0.000249659	0.174658	0.00522029	1.46724	6.39204e-05	59.8007	9.27421	1.84823
555			au26a43	0.0607569	0.00559676	0.00949803	0.00034935	0.199644	0.0476211	0.00121806	59.89	5.35736	60.9393	2.23087	80.4848	60.7261			60.845	4.3561	0.0381206	0.845201	585.678	1123.38	0.282998	5.357e-05	0.00420908	0.000103306	0.123374	0.00262862	1.46725	6.21367e-05	60.9393	9.15983	1.89295
556	PJA-4		au26a06	0.0210729	0.00223107	0.00472103	0.000179234	0.179293	0.0380661	0.00105898	21.1747	2.21864	30.3621	1.14999	-480.62	73.7679			28.8502	2.17221	15.9367	6.54981e-05	365.738	934.328									30.3621
557			au26a07	0.0355938	0.00233345	0.00512326	0.000166166	0.247366	0.0430852	0.00125939	35.513	2.28791	32.9423	1.06571	-162.687	72.704			33.206	2.07966	1.27707	0.258444	287.657	739.782	0.282973	2.45949e-05	0.000940526	1.46076e-05	0.0390646	0.000357403	1.46724	4.65347e-05	32.9423	7.82808	0.86916
558			au26a08	0.0295822	0.00275305	0.00461501	0.000222622	0.259167	0.0475986	0.00112721	29.6015	2.71509	29.6818	1.42852	79.3662	56.2349			29.6706	2.75375	0.000871101	0.976449	204.994	633.928	0.282934	2.4814e-05	0.00144467	5.18291e-05	0.0578175	0.00173563	1.46725	3.85743e-05	29.6818	6.34339	0.877024
559			au26a09	0.0303158	0.00155414	0.00429122	0.000154082	0.350201	0.0468491	0.000695269	30.3247	1.53162	27.6038	0.98903	41.5433	35.4922			28.1392	1.88706	3.26582	0.0707378	1141.04	4220.32	0.282966	2.68229e-05	0.00147692	2.62229e-05	0.0660847	0.00129084	1.46729	3.46007e-05	27.6038	7.44089	0.947919
560			au26a10	0.0509505	0.00356951	0.00445086	0.000260639	0.417932	0.0693057	0.00215573	50.4595	3.44871	28.6284	1.67274	907.852	64.0723			29.3499	3.33852	47.3354	5.98228e-12	145.449	495.25									28.6284
561			au26a12	0.076181	0.0274084	0.00446126	0.000570089	0.17759	0.177012	0.00679567	74.5481	25.86	28.6952	3.65871	2625.07	63.8383			28.4181	7.31096	3.0978	0.0783984	39.4482	219.138									28.6952
562			au26a16	0.0347868	0.0121587	0.00442441	0.000383034	0.123846	0.0949478	0.0054391	34.7215	11.9307	28.4586	2.45832	1527.04	107.919			28.5637	4.90028	0.276292	0.599142	137.204	312.46	0.283032	3.60036e-05	0.00100727	2.78528e-05	0.0376115	0.000811295	1.46725	5.26299e-05	28.4586	9.81483	1.27206
563			au26a18	0.0441763	0.00307458	0.00472313	0.000256978	0.390877	0.0594678	0.00167246	43.8933	2.98979	30.3756	1.6488	584.264	61.0514			31.6841	3.25179	23.1648	1.48693e-06	212.763	387.059									30.3756
564			au26a19	0.0311445	0.00469568	0.00481359	0.000157289	0.108363	0.0617665	0.00209382	31.1411	4.62391	30.9559	1.0091	666.035	72.5919			30.9604	2.00598	0.00160297	0.968073	392.199	1345.69	0.283034	5.53496e-05	0.000621648	8.51407e-06	0.0224187	0.000254787	1.46724	6.37068e-05	30.9559	9.94944	1.95558
565			au26a21	0.0364195	0.00392212	0.00452945	0.000317839	0.325796	0.05344	0.0013285	36.3223	3.84251	29.1328	2.03968	347.525	56.2182			29.9533	3.98913	3.72	0.0537643	241.569	852.603	0.282986	4.93515e-05	0.00117151	5.80301e-05	0.0371236	0.00158859	1.46725	6.45469e-05	29.1328	8.19902	1.74395
566	Pba-4		au25a115	0.0629245	0.0158677	0.00959676	0.000619001	0.127892	0.066267	0.00236015	61.9628	15.158	61.5697	3.95241	814.821	74.4489			61.5833	7.83491	0.000671445	0.979324	523.642	565.645	0.283061	3.82318e-05	0.00259702	9.80084e-05	0.0908261	0.00462522	1.46724	5.22125e-05	61.5697	11.4778	1.35065
567			au25a116	0.0582546	0.00657302	0.00948919	0.000506643	0.236596	0.0468035	0.00132072	57.4919	6.30674	60.8828	3.23533	39.2143	67.5158			60.4087	6.22162	0.283997	0.594093	552.791	825.561	0.283016	3.43244e-05	0.00203986	7.09535e-05	0.0699795	0.00309433	1.46726	5.00742e-05	60.8828	9.89768	1.21281
568			au25a117	0.060696	0.00840911	0.00964744	0.000587846	0.219903	0.0642641	0.00270963	59.8317	8.04987	61.8933	3.75329	750.335	89.0548			61.6584	7.27684	0.0648922	0.798925	184.315	173.05	0.283062	4.77274e-05	0.00210564	7.60662e-05	0.0719876	0.00228443	1.4673	5.03755e-05	61.8933	11.5226	1.68611
569			au25a119	0.0587376	0.00378144	0.00970561	0.000290683	0.232609	0.0437987	0.00144607	57.9553	3.62659	62.2647	1.85585	-121.998	81.4719			61.6587	3.56615	1.38349	0.239504	1092.14	787.48	0.283069	4.00641e-05	0.00442465	9.2985e-05	0.16136	0.005311	1.46727	4.30334e-05	62.2647	11.7048	1.41534
570			au25a121	0.0659022	0.00869774	0.010147	0.000620603	0.231707	0.0606397	0.00233859	64.8033	8.28551	65.0821	3.96048	626.479	83.1285			65.0495	7.67848	0.0011248	0.973234	157.435	235.154	0.283054	3.48319e-05	0.00315846	0.000253618	0.112199	0.00865068	1.46727	5.49497e-05	65.0821	11.2555	1.23057
571			au25a122	0.0619752	0.00594206	0.00952436	0.000476947	0.261147	0.0488998	0.00167757	61.0556	5.68136	61.1074	3.04559	143.03	80.5062			61.0998	5.85819	8.24969e-05	0.992768	337.923	362.37	0.283051	3.88243e-05	0.00207867	9.96799e-06	0.0738313	0.000910413	1.46723	4.29209e-05	61.1074	11.1341	1.37164
572			au25a125	0.056728	0.00602245	0.00893998	0.000389235	0.205055	0.0533288	0.00152351	56.0261	5.78682	57.3747	2.48694	342.811	64.6589			57.2452	4.84729	0.0539126	0.81639	539.324	642.882									57.3747
573			au25a126	0.0505622	0.00593359	0.00914241	0.000373993	0.174294	0.0564265	0.00158014	50.0843	5.7349	58.668	2.38907	469.189	61.9943			57.8119	4.63681	2.19354	0.138589	593.781	726.908									58.668
574			au25a127	0.0413647	0.0661004	0.00988956	0.00286693	0.090706	0.0486219	0.00221867	41.1556	64.4512	63.439	18.3004	129.639	107.348			62.2033	35.8965	0.118459	0.730712	346.738	409.869									63.439
575			au25a128	0.0385192	0.0118097	0.00907701	0.000941404	0.169139	0.0540173	0.0030021	38.3773	11.5466	58.2502	6.01409	371.773	125.145			54.8286	11.3022	2.74151	0.0977726	126.845	131.184									58.2502
576			au25a129	0.0664279	0.00524359	0.0100428	0.000342937	0.216297	0.0529475	0.00115651	65.304	4.9926	64.4173	2.18874	326.546	49.5795			64.5032	4.2687	0.0314395	0.859265	661.304	839.727	0.283011	4.45265e-05	0.00262382	6.08762e-05	0.0958557	0.00313827	1.46725	5.39916e-05	64.4173	9.74367	1.57332
577			au25a130	0.112303	0.0108394	0.00949627	0.000798678	0.435684	0.0926204	0.00437763	108.07	9.89496	60.928	5.10017	1480.14	89.6006			62.5929	10.1773	26.6438	2.4464e-07	79.6473	106.128									60.928
578			au25a131	0.0629158	0.00614253	0.00960113	0.000467886	0.249575	0.0519034	0.00150416	61.9545	5.86784	61.5976	2.98751	281.157	66.3165			61.6445	5.77148	0.00367958	0.951633	730.004	575.364	0.283011	2.85614e-05	0.00256887	1.82963e-05	0.0943175	0.00101081	1.46719	4.83554e-05	61.5976	9.69216	1.0092
579			au25a132	0.0840726	0.0237391	0.00942791	0.000985688	0.185133	0.0757377	0.00339115	81.9667	22.2349	60.4915	6.29481	1088.15	89.7303			61.0607	12.5335	0.937523	0.332918	366.24	305.038									60.4915
580	Pba-15		au25a32	0.0706674	0.0144499	0.0110967	0.00124836	0.275089	0.055099	0.00210269	69.3326	13.7037	71.14	7.95914	416.241	85.2635			70.8236	15.1665	0.0171104	0.895928	276.479	186.635	0.282953	3.39299e-05	0.00109633	3.49459e-05	0.0457065	0.00148353	1.46723	5.33182e-05	71.14	7.92538	1.19913
581			au25a33	0.0646419	0.00722162	0.011794	0.000631142	0.239504	0.0492676	0.00192697	63.602	6.88749	75.5844	4.02117	160.587	91.4875			73.2714	7.56815	2.87402	0.0900146	217.349	152.44	0.282983	4.49776e-05	0.000849665	3.38969e-05	0.0334857	0.00196743	1.46724	5.01596e-05	75.5844	9.07983	1.58941
582			au25a36	0.126696	0.0134779	0.011299	0.00084513	0.351556	0.0872093	0.00319258	121.125	12.1464	72.4297	5.38719	1365.12	70.4981			74.147	10.74	17.3821	3.05694e-05	206.043	143.402									72.4297
583			au25a37	0.0683477	0.00819166	0.0111306	0.000747186	0.280048	0.0550863	0.00213458	67.1303	7.78554	71.3561	4.76365	415.727	86.5843			70.5186	8.99959	0.286325	0.592586	222.407	160.388	0.282986	4.06931e-05	0.0012704	8.03887e-06	0.046779	0.000214184	1.46725	6.0641e-05	71.3561	9.07471	1.43799
584			au25a39	0.0710449	0.00987213	0.0116711	0.000832243	0.256584	0.0651789	0.00252627	69.6905	9.35908	74.8013	5.30309	780.115	81.4709			73.922	10.0932	0.290421	0.589953	125.079	106.567	0.282994	2.95194e-05	0.00107527	1.85109e-05	0.0353532	0.000566338	1.46726	4.52458e-05	74.8013	9.4446	1.04311
585			au25a42	0.0502443	0.00482633	0.0113152	0.00067477	0.310409	0.0404352	0.00170784	49.777	4.66613	72.5327	4.30118	-323.093	108.455			62.3052	7.20177	18.7335	1.50316e-05	264.91	191.815									72.5327
586			au25a44	0.0537274	0.00655756	0.0106398	0.00078368	0.301737	0.0489933	0.00178983	53.1389	6.31894	68.2263	4.99874	147.513	85.6584			63.0538	8.86951	4.99504	0.0254201	206.602	146.045									68.2263
587			au25a45	0.0660728	0.0106488	0.0102216	0.00105095	0.318977	0.051819	0.00207866	64.9658	10.1425	65.5579	6.70633	277.431	91.8562			65.4258	12.6143	0.00335705	0.953795	223.385	161.025	0.282984	3.3755e-05	0.0012068	6.41343e-06	0.0449622	0.00034972	1.46723	5.00984e-05	65.5579	8.89817	1.19282
588			au25a46	0.028714	0.00430193	0.0114031	0.000784763	0.229676	0.0245588	0.000835194	28.745	4.24618	73.0933	5.00187	-1822.31	122.082			45.7952	7.10352	59.3154	1.34318e-14	204.805	150.942									73.0933
589			au25a47	0.0309511	0.003879	0.0110595	0.000831276	0.299872	0.0229965	0.000745216	30.9507	3.82043	70.9028	5.30013	-2065.3	123.428			41.7979	6.94519	52.2451	4.89873e-13	288.783	206.348									70.9028
590			au25a48	0.0786283	0.0088631	0.011823	0.00104576	0.392344	0.050493	0.00225907	76.8545	8.34342	75.7688	6.66261	217.751	103.562			76.1166	12.1919	0.0167404	0.897051	161.927	138.633	0.282984	3.46674e-05	0.000928042	8.3977e-06	0.0369882	0.000267535	1.46724	5.13626e-05	75.7688	9.12071	1.22506
591			au25a49	0.0666998	0.0168685	0.0106349	0.0009721	0.180716	0.0744604	0.00331577	65.5629	16.057	68.195	6.20062	1053.97	89.6986			67.987	12.1373	0.0266754	0.87026	180.692	182.19	0.283001	4.5398e-05	0.000823576	3.10329e-05	0.0338213	0.00109144	1.46724	6.09498e-05	68.195	9.57407	1.60416
592	PK05-20		au25a08	0.0408343	0.00350468	0.00639693	0.000248241	0.226073	0.0482893	0.00116833	40.6382	3.41899	41.1059	1.59009	113.467	57.0888			41.0542	3.08846	0.0186052	0.891508	343.328	1847.92	0.282843	3.63305e-05	0.000432153	1.04652e-05	0.0119005	0.000257677	1.46725	4.37371e-05	41.1059	3.39503	1.28448
593			au25a09	0.0423272	0.00257265	0.00663051	0.00017544	0.217666	0.0511852	0.00103392	42.0936	2.50615	42.6019	1.12351	249.181	46.4909			42.5496	2.18671	0.040909	0.839715	491.385	1887.84	0.282853	3.51391e-05	0.000426171	7.187e-06	0.0114782	0.000167524	1.46725	4.45264e-05	42.6019	3.24059	1.37047
594			au25a10	0.0422309	0.00264511	0.00651463	0.000216339	0.265095	0.0449314	0.00101541	41.9998	2.57697	41.8598	1.38558	-59.3705	55.0951			41.8802	2.6667	0.00294137	0.956752	454.1	1668.2	0.282838	3.87621e-05	0.000492249	1.49839e-05	0.0134205	0.000340544	1.46727	4.64595e-05	41.8598	3.77595	1.24231
595			au25a16	0.0435896	0.00416766	0.00660731	0.000245264	0.19412	0.0530358	0.00115422	43.3226	4.05501	42.4533	1.57069	330.33	49.3657			42.5183	3.08232	0.0459363	0.830291	1282.23	2509.3	0.282886	3.05001e-05	0.000370834	5.76464e-06	0.00985844	0.000185088	1.46726	4.52679e-05	42.4533	4.94196	1.07818
596			au25a17	0.0422072	0.00236434	0.00682662	0.000156011	0.203984	0.0467836	0.000889325	41.9767	2.30349	43.8577	0.998891	38.1971	45.4906			43.6717	1.94471	0.660457	0.4164	745.546	4476.53	0.282859	2.52471e-05	0.000484442	1.48023e-05	0.0116237	0.000480947	1.46725	4.61768e-05	43.8577	4.03389	0.892569
597			au25a18	0.0402355	0.00301859	0.00653095	0.000224769	0.22937	0.0474103	0.000939745	40.054	2.94647	41.9643	1.43955	69.9426	47.152			41.725	2.78167	0.414919	0.519482	1221.3	2568.18	0.282881	2.69866e-05	0.00029156	1.12371e-06	0.00706827	4.7974e-05	1.46726	4.4559e-05	41.9643	4.76922	0.953992
598			au25a19	0.0388291	0.00325349	0.0060865	0.000271656	0.266336	0.0471707	0.000874693	38.6802	3.18006	39.1172	1.74061	57.8798	44.2109			39.0504	3.34193	0.018734	0.891132	1023.89	2971.68	0.282842	2.38814e-05	0.00043109	9.13761e-06	0.0101317	0.000266733	1.46722	3.92953e-05	39.1172	3.33483	0.844336
599			au25a28	0.0392568	0.00267922	0.0064746	0.000207597	0.234901	0.0443281	0.00094191	39.0981	2.61768	41.6034	1.32965	-92.437	52.134			41.2609	2.55958	0.900173	0.342735	980.251	2403.17									41.6034
600			au25a29	0.0398477	0.00364526	0.006411	0.000215392	0.183632	0.0524675	0.00108928	39.6753	3.5595	41.196	1.37966	305.836	47.2989			41.0764	2.70153	0.181322	0.670238	533.987	2092.57									41.196
601	PK06-36		au24a129	0.0477564	0.00772639	0.00740437	0.000789807	0.329654	0.047003	0.00210322	47.3688	7.48766	47.5558	5.054	49.3792	106.856			47.5126	9.49266	0.000617057	0.980161	561.411	503.936	0.282956	4.32142e-05	0.00140962	1.60993e-05	0.0495223	0.000605456	1.46724	5.66029e-05	47.5558	7.49227	1.52724
602			au24a131	0.0483542	0.00507833	0.00737501	0.000650784	0.420104	0.0541556	0.00236607	47.9479	4.91862	47.3679	4.16451	377.524	98.2799			47.5761	7.53858	0.0138257	0.906395	113.791	153.294	0.282912	4.75976e-05	0.000776113	2.46048e-05	0.0261308	0.000695976	1.46728	6.53303e-05	47.3679	5.96133	1.68242
603			au24a132	0.0446757	0.00852329	0.00727956	0.000643437	0.231652	0.0507087	0.00279459	44.3788	8.2843	46.757	4.11789	227.611	127.338			46.4471	7.94357	0.0811946	0.775685	320.834	462.57	0.282927	4.72764e-05	0.000656384	2.01785e-05	0.021293	0.000854082	1.46725	5.13827e-05	46.757	6.49893	1.67097
604			au24a134	0.0437629	0.0043005	0.00698567	0.000675723	0.492173	0.0425152	0.00210125	43.4912	4.18357	44.876	4.32577	-195.922	123.735			44.1372	7.34289	0.104231	0.746811	141.97	154.96	0.282929	3.25529e-05	0.0013048	2.39235e-05	0.0412952	0.000647195	1.46722	5.07249e-05	44.876	6.51122	1.15057
605			au24a135	0.0832355	0.00984694	0.00808658	0.00058471	0.3056	0.100307	0.00489699	81.1823	9.23014	51.9198	3.73905	1629.79	90.7435			53.0487	7.4448	10.6805	0.00108269	220.573	259.955									51.9198
606			au24a136	0.0315217	0.00287405	0.00617424	0.000621177	0.551718	0.0359489	0.00160044	31.5125	2.82908	39.6794	3.97979	-634.812	121.92			32.78	5.55296	5.83692	0.0156932	203.414	208.722									39.6794
607			au24a139	0.0512325	0.00329831	0.00756321	0.000280161	0.287691	0.0434713	0.00125219	50.7319	3.18583	48.5722	1.79248	-140.543	71.3368			48.9072	3.44658	0.46221	0.496593	516.066	697.667	0.282973	3.65586e-05	0.00147856	3.26935e-05	0.0361838	0.000782105	1.46722	4.82666e-05	48.5722	8.12208	1.29195
608			au24a140	0.0432717	0.00583348	0.00675797	0.000605538	0.332331	0.0566307	0.00233602	43.0133	5.67754	43.4181	3.87735	477.182	91.1938			43.3223	7.2683	0.00502394	0.943495	187.596	227.093	0.28294	2.51227e-05	0.000767685	1.97875e-05	0.0212258	0.000741594	1.46726	4.30827e-05	43.4181	6.88268	0.887916
609			au24a142	0.0651264	0.00515427	0.00766674	0.000419503	0.345688	0.0650543	0.00212989	64.064	4.91356	49.2345	2.68371	776.092	68.8639			50.9281	5.25562	9.78165	0.00176261	399.624	334.076									49.2345
610			au24a143	0.0437423	0.0125065	0.00715236	0.00104444	0.255369	0.0580464	0.00441493	43.4712	12.1667	45.943	6.68505	531.514	166.59			45.5501	12.7879	0.0404822	0.840541	282.421	313.328									45.943
611			au24a144	0.0524894	0.00586874	0.00723557	0.000448225	0.277026	0.055	0.00174708	51.9452	5.66184	46.4756	2.86869	412.222	71.0212			47.1197	5.58287	0.952223	0.329157	838.119	686.377									46.4756
612			au24a145	0.0456639	0.0283716	0.00719936	0.000809532	0.0904896	0.0908664	0.00385844	45.3389	27.55	46.2438	5.18128	1443.8	80.8943			46.2272	10.313	0.00107834	0.973808	460.852	451.651									46.2438
613			au24a146	0.0378449	0.00329894	0.0069924	0.000317215	0.260213	0.0454512	0.0015927	37.7177	3.22754	44.919	2.0307	-31.4045	84.9732			43.3373	3.78998	4.67941	0.0305264	485.64	742.189									44.919
614			au24a149	0.0227261	0.00281389	0.0074974	0.000426357	0.229641	0.0277802	0.00116871	22.8174	2.79369	48.151	2.72802	-1401.71	136.671			35.6814	4.306	54.9432	1.24065e-13	497.185	434.6									48.151
615			au24a150	0.048824	0.00800232	0.0072347	0.000499334	0.210551	0.0608024	0.00221862	48.4029	7.74718	46.47	3.19579	632.252	78.5773			46.6309	6.26017	0.0623715	0.802785	599.052	462.024									46.47
616			au24a151	0.0224114	0.00279956	0.00725245	0.00058599	0.323412	0.0282636	0.00132177	22.505	2.78031	46.5836	3.75034	-1346.02	149.975			29.3565	5.06603	38.524	5.40856e-10	240.506	317.417									46.5836
617			au24a152	0.0417392	0.00470886	0.00691835	0.00047894	0.306815	0.0498737	0.00199684	41.5206	4.58973	44.445	3.06623	189.11	93.1635			43.7609	5.73089	0.392376	0.531053	403.756	319.059	0.282918	3.43185e-05	0.000991432	3.54863e-05	0.0342653	0.00152008	1.46727	4.22294e-05	44.445	6.12331	1.21302
618			au24a153	0.0256671	0.021579	0.00637462	0.000993294	0.0926701	0.0712442	0.00394818	25.7331	21.3626	40.963	6.36262	964.428	113.159			40.0384	12.4545	0.498344	0.480232	294.04	321.112									40.963
619			au24a154	0.0535229	0.00389218	0.00701192	0.000276762	0.271385	0.0564518	0.00153154	52.9417	3.75128	45.044	1.7717	470.184	60.0503			45.8043	3.47063	4.5562	0.0327999	654.452	1022.66									45.044
620			au24a155	0.0362336	0.00768574	0.00705549	0.000485329	0.162146	0.0595634	0.00263372	36.1402	7.53109	45.3229	3.10671	587.752	95.9307			44.3926	6.01844	1.44503	0.229329	595.939	694.809									45.3229
621	PK05-16		au24a102	0.0411687	0.0038824	0.00621093	0.000204274	0.174379	0.0616609	0.00189852	40.9644	3.78625	39.9144	1.30871	662.368	65.9738			39.9765	2.57883	0.0769257	0.781508	1383.83	2258.93	0.282873	4.80516e-05	0.00037211	6.59823e-06	0.0110005	0.00028517	1.46724	4.34815e-05	39.9144	4.44267	1.6987
622			au24a105	0.0411197	0.00460066	0.00671255	0.000386604	0.257382	0.0447551	0.00124333	40.9167	4.48693	43.1273	2.47559	-68.9645	67.8525			42.774	4.73515	0.238249	0.625476	595.998	1912.89	0.28286	2.39697e-05	0.000447213	4.26246e-06	0.0115068	0.000125246	1.46725	4.03125e-05	43.1273	4.0447	0.847404
623			au24a106	0.0436169	0.00463782	0.0067517	0.000297887	0.207467	0.0541915	0.00147802	43.3492	4.51235	43.378	1.90743	379.016	61.3359			43.3754	3.72572	4.05782e-05	0.994956	833.075	2039.6	0.282837	2.60291e-05	0.000720828	3.46283e-05	0.0195859	0.00104408	1.46721	4.06767e-05	43.378	3.22324	0.920286
624			au24a107	0.0484351	0.00456083	0.00669291	0.000234904	0.186364	0.0624834	0.00183318	48.0262	4.41705	43.0015	1.50422	690.696	62.5721			43.265	2.97268	1.30262	0.253734	617.165	1718.53									43.0015
625			au24a115	0.0416883	0.00488523	0.00612005	0.000268904	0.187474	0.05697	0.00154686	41.471	4.76186	39.3321	1.72292	490.372	59.8909			39.467	3.39317	0.202349	0.652831	959.171	2204.57	0.282861	2.07415e-05	0.000458362	3.71334e-06	0.0100878	0.000143111	1.46725	3.49858e-05	39.3321	3.99271	0.733277
626			au24a117	0.0437423	0.00229606	0.00657354	0.000198241	0.287266	0.0473211	0.00108502	43.4712	2.23367	42.2371	1.2696	65.4607	54.5898			42.4345	2.43677	0.30606	0.580105	825.492	2084	0.282872	2.07253e-05	0.000601957	1.12407e-05	0.014153	0.000286627	1.46724	3.66479e-05	42.2371	4.45246	0.732674
627			au24a118	0.0460809	0.00317634	0.00643371	0.000242213	0.273087	0.0491376	0.00126482	45.7438	3.08313	41.3415	1.55142	154.403	60.2779			41.8574	3.01886	2.07682	0.149549	1087.22	2542.87									41.3415
628			au24a121	0.0358989	0.00578666	0.00626877	0.000296136	0.146532	0.0543817	0.0019074	35.8121	5.67206	40.285	1.89712	386.89	78.7684			40.0051	3.72676	0.615752	0.432634	297.347	1235.72									40.285
629			au24a125	0.0432076	0.00351747	0.00647276	0.000250656	0.237842	0.0471724	0.00127453	42.9509	3.42365	41.5916	1.60544	57.9641	64.4173			41.739	3.12404	0.157948	0.691054	612.419	1940.05	0.282844	2.14096e-05	0.000476831	7.89448e-06	0.0116782	0.000260549	1.46724	3.87061e-05	41.5916	3.44144	0.756939
630	LB08-31a		ap09a95	0.053138	0.0101002	0.00868421	0.000862349	0.261216	0.0484469	0.00223967	52.5707	9.73808	55.7403	5.5112	121.15	108.926			55.2038	10.5072	0.103614	0.747535	159.298	135.708	0.283005	6.54484e-05	0.00309648	6.89486e-05	0.104734	0.00341086	1.46726	6.25424e-05	55.7403	9.35912	2.31262
631			ap09a97	0.0564866	0.00639811	0.00884282	0.000633658	0.316321	0.046586	0.00176069	55.7942	6.14918	56.7539	4.04902	28.0539	90.6183			56.541	7.61668	0.0239665	0.87697	186.909	135.362	0.283013	5.33533e-05	0.00199725	4.49111e-05	0.0616483	0.00183873	1.46727	5.98076e-05	56.7539	9.70797	1.88519
632			ap09a98	0.0626659	0.00768145	0.00938437	0.000496881	0.215976	0.0552026	0.0025344	61.7157	7.33967	60.2134	3.17332	420.438	102.501			60.3535	6.19697	0.0418384	0.837929	177.755	167.612	0.282974	6.65953e-05	0.00171142	5.36156e-05	0.0528535	0.00205234	1.46727	6.63487e-05	60.2134	8.39974	2.35341
633			ap09a99	0.0533494	0.00849902	0.00914712	0.000459704	0.157734	0.0636937	0.0028424	52.7746	8.19268	58.6981	2.93658	731.475	94.544			58.2734	5.75362	0.517427	0.471945	183.502	133.679	0.283022	4.18705e-05	0.00272109	0.000151728	0.0878522	0.00594676	1.46729	5.30303e-05	58.6981	10.0277	1.47941
634			ap09a104	0.0521052	0.00510112	0.00925304	0.000365699	0.201848	0.0481826	0.0018628	51.5745	4.92308	59.3746	2.33583	108.242	91.3133			58.3847	4.49737	2.44305	0.118046	229.25	248.426									59.3746
635			ap09a105	0.059402	0.00641454	0.00966753	0.000512332	0.245381	0.0504036	0.00154712	58.5922	6.14801	62.0216	3.27108	213.648	71.1035			61.5065	6.27134	0.30519	0.580645	469.772	353.175	0.282987	4.77853e-05	0.00482057	0.000160507	0.142158	0.00412831	1.46723	5.23679e-05	62.0216	8.75366	1.68861
636			ap09a107	0.0629517	0.00879516	0.00955229	0.00113688	0.425934	0.0510438	0.00271237	61.9888	8.40157	61.2858	7.25947	242.807	122.443			61.5489	13.0692	0.00692725	0.933666	63.6388	64.9546	0.282966	4.53356e-05	0.00180703	5.27069e-05	0.0499011	0.00168895	1.46728	4.97e-05	61.2858	8.14159	1.60215
637			ap09a108	0.0511215	0.00841347	0.00968974	0.000627541	0.196756	0.0490911	0.00207614	50.6246	8.12741	62.1634	4.00657	152.186	99.0775			60.5256	7.66184	1.93757	0.163928	148.24	155.539									62.1634
638			ap09a109	0.0566212	0.00608755	0.0089005	0.00048798	0.254973	0.0596134	0.00247772	55.9235	5.84996	57.1224	3.11797	589.57	90.1452			56.9465	5.99239	0.0415277	0.838523	87.8785	127.158	0.282989	3.49745e-05	0.00116853	4.94667e-05	0.0316081	0.0016472	1.46727	5.08905e-05	57.1224	8.88822	1.23589
639			ap09a110	0.0638427	0.011391	0.00832164	0.00080675	0.271676	0.0617627	0.00271182	62.8396	10.8721	53.4228	5.15772	665.902	94.0257			54.3377	10.1009	0.769765	0.380289	108.136	116.234									53.4228
640			ap09a113	0.0663832	0.0106939	0.00873771	0.000827131	0.293811	0.0639706	0.003104	65.2614	10.1825	56.0822	5.28584	740.657	102.645			57.1718	10.298	0.836762	0.360326	85.8872	115.229									56.0822
641			ap09a115	0.050764	0.00534278	0.0096491	0.000418023	0.205812	0.0447601	0.00194129	50.2793	5.16288	61.9039	2.669	-68.6955	105.926			60.0964	5.08067	4.8472	0.0276911	320.246	210.188									61.9039
642			ap09a116	0.0609919	0.00774073	0.00967095	0.000557254	0.22701	0.0589168	0.0027161	60.115	7.40798	62.0434	3.55788	564.023	100.418			61.8109	6.88553	0.0670178	0.795728	130.298	166.733	0.282994	2.83974e-05	0.00159026	1.42831e-05	0.0434274	0.000389524	1.46728	4.46951e-05	62.0434	9.16292	1.00346
643	LB09-16.6A		ap08b49	0.0611227	0.00397569	0.00918718	0.00031962	0.267431	0.0444445	0.00120071	60.2401	3.80432	58.954	2.04164	-86.0057	66.2021			59.1392	3.93318	0.114078	0.735547	343.861	712.667	0.282994	2.68851e-05	0.00365503	2.31495e-05	0.102088	0.000563226	1.46726	4.23638e-05	58.954	8.99798	0.950022
644			ap08b50	0.0684135	0.0129055	0.0102015	0.000790678	0.205434	0.0555359	0.00213284	67.1929	12.265	65.43	5.04557	433.862	85.5425			65.5788	9.87598	0.0206242	0.885806	129.473	282.122	0.282999	4.01459e-05	0.00212899	3.82497e-05	0.0535881	0.00116819	1.46723	5.15881e-05	65.43	9.38387	1.41859
645			ap08b51	0.0565912	0.00517763	0.00884995	0.000522389	0.322583	0.0480764	0.00183683	55.8947	4.9757	56.7995	3.338	103.029	90.3268			56.5913	6.2645	0.0325239	0.856883	75.4966	47.5258									56.7995
646			ap08b53	0.0627939	0.00578506	0.010091	0.000429906	0.231216	0.0466092	0.00296988	61.838	5.52699	64.725	2.74367	29.2501	152.741			64.3492	5.29275	0.268892	0.604075	153.075	427.604	0.282975	3.70356e-05	0.00315056	0.000172462	0.0851476	0.00409559	1.46727	5.97925e-05	64.725	8.45555	1.30879
647			ap08b58	0.0664534	0.00602594	0.00936821	0.000479362	0.282143	0.0520391	0.00129622	65.3283	5.73737	60.1103	3.06149	287.127	56.9387			60.8143	5.92591	0.837724	0.360051	245.079	708.282									60.1103
648			ap08b59	0.0619873	0.00707483	0.00961799	0.000654114	0.297938	0.0583439	0.00337133	61.0671	6.76436	61.7053	4.17652	542.699	126.322			61.5809	7.92049	0.00878729	0.925315	105.808	133.048	0.282977	3.55881e-05	0.00283896	0.000237785	0.0732326	0.00635659	1.46729	3.64557e-05	61.7053	8.4993	1.25763
649			ap08b60	0.0640427	0.00527629	0.00962654	0.000435463	0.274531	0.0498189	0.00129274	63.0304	5.035	61.7599	2.78041	186.552	60.4079			61.9539	5.34325	0.0635062	0.801038	217.354	731.061	0.282986	2.96727e-05	0.00383354	4.99316e-05	0.10321	0.00122443	1.46725	4.01817e-05	61.7599	8.75048	1.04856
650			ap08b61	0.060044	0.0130768	0.00907766	0.000776998	0.19651	0.0600968	0.00185677	59.2074	12.5258	58.2543	4.96379	607.063	66.8138			58.3295	9.72829	0.00577757	0.939411	245.282	543.472									58.2543
651			ap08b62	0.0589832	0.00506115	0.00910278	0.000403407	0.258237	0.0514472	0.00121882	58.1908	4.85277	58.4148	2.57707	260.918	54.4107			58.3826	4.96004	0.00211531	0.963319	356.679	954.871	0.282944	2.93418e-05	0.00283406	0.000156959	0.077066	0.00463739	1.46724	4.65225e-05	58.4148	7.24271	1.03702
652			ap08b63	0.0650424	0.00690679	0.00956292	0.000775598	0.381888	0.0470248	0.00137397	63.984	6.58475	61.3537	4.95246	50.4854	69.7593			62.0895	9.1987	0.16077	0.688449	237.833	688.662	0.282997	3.05931e-05	0.00403732	4.811e-05	0.112966	0.00120807	1.46727	4.272e-05	61.3537	9.12796	1.08104
653			ap08b67	0.0646955	0.00443176	0.00953347	0.000321954	0.246497	0.0506062	0.00116157	63.6532	4.22649	61.1656	2.05585	222.935	53.0806			61.4553	3.99206	0.346873	0.555888	451.482	1159.38									61.1656
654			ap08b68	0.0746314	0.0117649	0.00995682	0.0012202	0.388698	0.0537778	0.0021604	73.085	11.1163	63.8684	7.78836	361.756	90.6187			65.9597	14.7741	0.722644	0.395279	490.908	298.207									63.8684
655			ap08b69	0.0634916	0.00953742	0.00958555	0.000627634	0.217944	0.0571757	0.00242626	62.5044	9.10598	61.4982	4.00757	498.318	93.4735			61.5962	7.8158	0.0121775	0.912128	151.591	184.682	0.282962	3.05301e-05	0.00205327	1.81773e-05	0.0537631	0.000346248	1.46722	4.38739e-05	61.4982	7.99073	1.07895
656			ap08b70	0.0623383	0.00849919	0.00959817	0.000826496	0.315791	0.0622342	0.00354239	61.4027	8.12353	61.5787	5.27728	682.167	121.567			61.541	9.95603	0.000464013	0.982833	65.7848	89.0595									61.5787
657			ap08b71	0.0645883	0.0172883	0.00973039	0.000654668	0.125679	0.0624022	0.00222746	63.5509	16.4893	62.4229	4.17959	687.922	76.1636			62.4593	8.29092	0.00467248	0.9455	432.796	1040.08									62.4229
658			ap08b72	0.0643514	0.00716255	0.00991301	0.000491244	0.222614	0.0524802	0.00263387	63.325	6.83302	63.5887	3.13568	306.388	114.33			63.5602	6.09477	0.00148053	0.969313	295.76	201.116									63.5887
659	LB09-33		ap08a70	0.0648998	0.0158833	0.0099016	0.00137966	0.284668	0.0545027	0.00207609	63.848	15.1448	63.5159	8.80666	391.879	85.4695			63.5728	16.8259	0.000477403	0.982588	68.9001	155.54									63.5159
660			ap08a76	0.0677551	0.00828482	0.0105844	0.000755401	0.291836	0.0563427	0.00228215	66.5669	7.87846	67.8731	4.81862	465.9	89.7206			67.6214	9.1384	0.0270493	0.869364	117.295	171.174									67.8731
661			ap08a79	0.0698191	0.00683737	0.0115212	0.000445871	0.197591	0.0519958	0.00160247	68.5278	6.48946	73.8456	2.84153	285.226	70.4737			73.2907	5.51741	0.661968	0.415862	177.702	404.839									73.8456
662			ap08a81	0.0771934	0.00882452	0.0106505	0.000985407	0.404674	0.0490121	0.00203571	75.5028	8.31816	68.2945	6.2854	148.412	97.3724			70.2626	11.7502	0.779891	0.377178	68.8648	136.122									68.2945
663			ap08a82	0.0700436	0.00677873	0.0106612	0.000680912	0.32997	0.0475868	0.00174652	68.7408	6.43246	68.3628	4.34314	78.7784	87.1627			68.45	8.15833	0.00341795	0.953377	89.6923	183.086	0.282982	4.47978e-05	0.00162497	3.52694e-05	0.0498206	0.00156031	1.46728	4.93412e-05	68.3628	8.83959	1.58306
664			ap08a83	0.0706814	0.0126346	0.0109157	0.00109125	0.279631	0.0502897	0.00247584	69.3459	11.9821	69.9859	6.95871	208.404	114.153			69.8752	13.2786	0.00281934	0.957658	140.994	205.555	0.283018	5.98384e-05	0.00255235	9.02932e-05	0.0781927	0.0037701	1.46722	6.18553e-05	69.9859	10.1116	2.1143
665			ap08a84	0.0744758	0.00653303	0.011281	0.000522123	0.263812	0.0466871	0.00195802	72.9379	6.17374	72.315	3.32828	33.251	100.457			72.4067	6.40138	0.0101144	0.919893	205.407	203.003									72.315
666			ap08a85	0.0667989	0.00565695	0.0101018	0.000573344	0.335099	0.0438286	0.00143852	65.6572	5.38431	64.7937	3.65905	-120.315	80.9643			64.9943	6.874	0.0255444	0.873017	130.84	267.475									64.7937
667			ap08a89	0.0725042	0.00852054	0.0100177	0.000791304	0.336079	0.0533989	0.0019094	71.073	8.06674	64.2569	5.05048	345.783	80.8871			65.5141	9.66195	0.731925	0.392261	191.837	317.062	0.282987	4.0916e-05	0.00177048	6.98523e-06	0.0531061	0.000233547	1.46727	6.03263e-05	64.2569	8.95275	1.44586
668			ap08a91	0.0697411	0.00653192	0.0100784	0.00054011	0.286093	0.0514941	0.00163197	68.4538	6.2	64.6445	3.44703	263.008	72.7607			65.2168	6.63857	0.379896	0.537657	146.656	259.075	0.282997	4.34548e-05	0.00167591	1.81515e-05	0.0474285	0.000542313	1.46725	5.83444e-05	64.6445	9.28738	1.53552
669			ap08a92	0.0702347	0.0138202	0.0107686	0.000991627	0.23399	0.0498948	0.00163382	68.9222	13.1119	69.0477	6.32433	190.096	76.1809			69.0327	12.255	9.10087e-05	0.992387	491.24	480.421	0.28299	5.00753e-05	0.0021639	6.58925e-05	0.0607757	0.00192497	1.46723	4.73278e-05	69.0477	9.12982	1.76951
670			ap08a93	0.0581291	0.00906305	0.00928777	0.00109957	0.379666	0.0447308	0.00146192	57.3715	8.69693	59.5965	7.02307	-70.2938	79.846			58.8543	12.7434	0.0630564	0.801729	403.102	484.302									59.5965
671			ap08a94	0.0584541	0.0059348	0.00951131	0.000443741	0.229757	0.0500634	0.00156575	57.6833	5.6933	61.0241	2.83359	197.938	72.6566			60.5841	5.46216	0.338734	0.560559	261.199	394.56	0.283036	3.32511e-05	0.00163132	2.38173e-05	0.0420927	0.000863237	1.46729	5.2331e-05	61.0241	10.5931	1.1748
672			ap08a95	0.0624061	0.00494313	0.0100465	0.00020902	0.131331	0.0508072	0.00256273	61.4675	4.72435	64.441	1.33403	232.093	116.452			64.314	2.63735	0.395009	0.529677	1825.1	1501.75	0.282964	4.16435e-05	0.00350608	5.89719e-05	0.102736	0.00218206	1.46725	4.82775e-05	64.441	8.07231	1.47168
673	KO8-4		ap09a04	0.03228	0.00150122	0.00499111	0.000110905	0.238899	0.0472839	0.00082913	32.2587	1.47665	32.0947	0.711388	63.5892	41.7628			32.1139	1.38028	0.0123097	0.911655	978.228	2590.08	0.282859	5.01995e-05	0.000888198	1.2521e-05	0.0284853	0.000755755	1.46724	6.72524e-05	32.0947	3.76772	1.77472
674			ap09a05	0.0326883	0.00190099	0.00502822	0.000131246	0.224416	0.0478714	0.000900105	32.6602	1.86913	32.3328	0.841833	92.9167	44.5363			32.366	1.64019	0.030658	0.861004	379.039	1991.61	0.282863	4.03725e-05	0.000534698	3.02005e-05	0.0150613	0.00132081	1.46729	7.40532e-05	32.3328	3.93022	1.42728
675			ap09a12	0.028552	0.0144221	0.00452672	0.000635022	0.138862	0.0802821	0.00640305	28.585	14.2374	29.1153	4.07517	1203.93	157.14			29.0929	8.06142	0.00138436	0.970319	11.7534	129.602									29.1153
676			ap09a13	0.0325914	0.00192176	0.00494246	0.000176738	0.303223	0.0456728	0.000982098	32.565	1.88973	31.7827	1.13372	-19.6279	52.0255			31.9223	2.16513	0.171947	0.678388	533.657	1575.63	0.282881	3.87254e-05	0.000405833	7.74961e-06	0.011419	0.000303042	1.46724	5.3151e-05	31.7827	4.53578	1.36896
677			ap09a14	0.0284881	0.00497664	0.00473224	0.00036088	0.21827	0.0473151	0.000991785	28.522	4.91323	30.434	2.31543	65.1604	49.908			30.2089	4.48193	0.14923	0.699275	902.831	4012.57	0.28285	3.79882e-05	0.000896574	4.14397e-05	0.0250516	0.00118451	1.46733	5.88038e-05	30.434	3.41329	1.34305
678			ap09a16	0.0308309	0.00167346	0.00475582	0.000150471	0.291454	0.0476162	0.00074725	30.8323	1.64838	30.5853	0.965409	80.2414	37.2595			30.6278	1.84555	0.0224207	0.880973	1167.26	4420.16									30.5853
679			ap09a18	0.0308085	0.00247259	0.00480306	0.000219188	0.284307	0.0475304	0.000852566	30.8102	2.43559	30.8884	1.40622	75.9586	42.6216			30.8752	2.68958	0.00102596	0.974449	515.102	2678.4	0.282829	3.17093e-05	0.00124843	5.57855e-05	0.0364499	0.000956157	1.46725	4.80145e-05	30.8884	2.65809	1.12115
680
681
	This study
682	Leucogranite, Indus confluence (SU-01-8)
683	25		white core	0.0035	1	2054	53.16	5.6	0.01		2073	0.02539	0.35	0.4673	0.4	0.13348			0.15		161.7	689.3	2144.2	0.93	0.282359	1.2e-05	0.282334	-14.1099					161.7	-4.96809	0.424759	1.63946
684	Granite			dyke,	01B22,	Kohistan,	71?47'29"E/35?29'09"N
685	31			0.0202	5	196	5.65	0.5	0.06		14751	0.03024	0.34	0.2385	0.38	0.05721			0.13		192	217.2	499.7	0.94	0.282514	5	0.282495						192	-4.7
686	32			0.0153	4	626	19.42	1.8	0.31		10398	0.03121	0.35	0.2211	0.39	0.05138			0.14		198.1	202.8	257.8	0.93	0.282629	3	0.28261						198.1	-0.5
687	33			0.012	3	414	7.79	0.6	0.11		9770	0.01962	0.35	0.13715	0.4	0.05071			0.16		125.2	130.5	227.4	0.92	0.282761	5	0.282749						125.2	2.5
688	34			0.015	3	372	10.04	1.5	0.36		6251	0.02265	0.33	0.18757	0.4	0.05127			0.16		168.8	174.6	253.1	0.92	0.28271	6	0.282694						168.8	1.7
689	35			0.0063	4	621	15.7	0.6	0.13		10835	0.0257	0.47	0.19021	0.48	0.05537			0.3		163.61	176.8	357.2	0.8	0.282586	5	0.28257						163.61	-2.8
690	36			0.0139	4	1094	10.76	0.7	0.15		13478	0.0094	0.61	0.0649	0.6	0.05007			0.37		60.32	63.9	198.2	0.81									60.32
691	37			0.0062	2	557	4.48	0.3	0.23		4994	0.00774	0.59	0.05123	0.59	0.04802			0.49		49.69	50.7	99.6	0.66	0.282694	5	0.28269						49.69	-1.6
	This study			207Pb/235U	1s error	206Pb/238U	1s error	Rho	207Pb/206Pb	1s error	207Pb/235U	1s error	206Pb/238U	1s error	ppm	ppm
	file name										Ma	Ma	Ma	Ma	Th232	U238	File name	mass bias and interference corrected 176Hf/177Hf	2SE	mass bias and interference corrected 176Lu/177Hf	2SE	mass bias and interference corrected 176Yb/177Hf	2SE	mass bias corrected 178Hf/177Hf	2SE	EpsHf T	2s-sig
	LB11-O-36
			ap23a59	0.0269259	0.0028025	0.00381705	0.000220291	0.277244	0.0546251	0.00161	26.9785	2.771	24.5595	1.41469	152.431	4335.78	12my02b56	0.282968	2.67432e-05	0.00038484	1.46536e-05	0.0110825	0.000462808	1.46719	4.23505e-05	7.45666	0.945096
			ap23a57	0.0298536	0.00224693	0.00428701	0.000194875	0.30198	0.0527379	0.0012855	29.8692	2.21536	27.5768	1.25088	223.965	4726.85	12my02b50	0.28293	1.38368e-05	0.00061201	8.81344e-06	0.0175619	0.000356866	1.46721	3.2086e-05	6.19932	0.489054
			ap23a56	0.143772	0.0251778	0.0244475	0.00142722	0.166679	0.0593309	0.00242623	136.398	22.3516	155.703	8.98088	385.036	277.606	12my02b47	0.283066	2.43769e-05	0.00128758	2.26594e-05	0.0299595	0.00048568	1.46726	4.26521e-05	13.7043	0.861173
			ap23a58	0.164571	0.0281554	0.0244812	0.00327027	0.390403	0.0512822	0.00285261	154.697	24.5485	155.915	20.5778	96.7009	98.645	12my02b55	0.28305	2.98437e-05	0.00132691	3.09249e-05	0.0298483	0.000828998	1.46719	3.81293e-05	13.1322	1.05436
			ap23a60	0.205484	0.0380747	0.0220893	0.00339537	0.414781	0.0710944	0.00386635	189.756	32.0704	140.847	21.4149	111.072	147.465	12my02b58	0.283074	2.92868e-05	0.00102131	2.2429e-05	0.0223989	0.00060194	1.46719	4.29737e-05	13.6706	1.0346
			ap23a61	0.199171	0.0287369	0.0225632	0.00217824	0.334551	0.0738493	0.00301479	184.425	24.3326	143.835	13.732	225.657	205.013
			ap23a64	0.187276	0.0383309	0.0272053	0.00243638	0.218773	0.0687279	0.00372763	174.302	32.7814	173.033	15.29	63.0173	87.4646	12my02b57	0.283055	2.13836e-05	0.00060643	2.28383e-05	0.0132868	0.000480504	1.4672	3.79357e-05	13.751	0.755456
			ap23a66	0.181393	0.0364988	0.0258276	0.00218845	0.210554	0.0851882	0.0258156	169.258	31.37	164.382	13.7525	112.669	123.299	12my02b63	0.283078	2.10631e-05	0.000523429	1.79486e-05	0.01211	0.000635269	1.46717	5.24584e-05	14.3747	0.744074
			ap23a67	0.163882	0.0261049	0.0244215	0.00282442	0.363024	0.0540973	0.00247395	154.096	22.7742	155.54	17.7733	159.513	142.589	12my02b70	0.283067	2.10297e-05	0.00124921	0.00011484	0.0284827	0.00250153	1.4672	3.62784e-05	13.7186	0.742924
			ap23a68	0.171296	0.024392	0.028296	0.00206323	0.256031	0.0637156	0.00476976	160.543	21.1452	179.874	12.9344	66.7963	82.4859	12my02b64	0.283051	2.55492e-05	0.000760329	1.49995e-05	0.0182621	0.000486943	1.4672	4.65124e-05	13.7258	0.902637
			ap23a69	0.152324	0.0173796	0.0241411	0.00134067	0.243368	0.0564788	0.00231133	143.962	15.3142	153.774	8.43876	339.978	246.525	12my02b65	0.283073	2.40045e-05	0.00110394	5.12411e-05	0.0261836	0.00121329	1.46724	4.55255e-05	13.9149	0.847998
			ap23a70	0.1256	0.0200757	0.0200453	0.0021682	0.338356	0.057	0.00387571	120.136	18.1099	127.942	13.7024	49.1771	103.461	12my02b66	0.283061	2.82267e-05	0.00081436	3.53259e-05	0.0190675	0.00103726	1.4672	5.02837e-05	12.9745	0.997193
